# Supplementary material for: Two-Dimensional Thin-Layer Chromatography as an Accessible, Low-Cost Tool for Lipid-Class Profile Screening
Source: Preprints.org preprint supplement (doi:10.20944/preprints202405.0219.v1), 2024-05-06
Supplement: Supplementary file 1 [file supplementary]

## Sheet: Table S1
Table S1. Detailed Information of all lipids annotated in Chlamydomonas reinhardtii (CC-125)
In TLC fraction and total extract columns, "Y" means found while "N" means not found. Fraction numbers refer to the numbers in Fig S1A.
Precursor	Lipid	Adduct	RT (min)	Experimental m/z	Calculated m/z	Error	TLC fraction	Total extract
DG 32:0(16:0/16:0)[M+NH4]+	DG 32:0(16:0/16:0)	[M+NH4]+	7.23313	586.54	586.541	-0.000722	N	Y
DG 32:1(16:0/16:1)[M+NH4]+	DG 32:1(16:0/16:1)	[M+NH4]+	7.02135	584.521	584.525	-0.0038856	21	N
DG 34:1(16:0/18:1)[M+NH4]+	DG 34:1(16:0/18:1)	[M+NH4]+	7.31739	612.556	612.557	-6.225e-05	21	Y
DG 34:2(16:0/18:2)[M+NH4]+	DG 34:2(16:0/18:2)	[M+NH4]+	6.66292	610.542	610.541	0.0013736	N	Y
DG 34:2(16:1/18:1)[M+NH4]+	DG 34:2(16:1/18:1)	[M+NH4]+	7.03442	610.541	610.541	0.00022685	21	Y
DG 34:3(16:0/18:3)[M+NH4]+	DG 34:3(16:0/18:3)	[M+NH4]+	6.29645	608.525	608.525	-0.0004825	N	Y
DG 34:3(16:1/18:2)[M+NH4]+	DG 34:3(16:1/18:2)	[M+NH4]+	6.44631	608.524	608.525	-0.00155845	21	Y
DG 34:4(16:1/18:3)[M+NH4]+	DG 34:4(16:1/18:3)	[M+NH4]+	5.99328	606.509	606.51	-0.00051665	21	Y
DG 36:3(18:0/18:3)[M+NH4]+	DG 36:3(18:0/18:3)	[M+NH4]+	7.17404	636.555	636.557	-0.00170255	21	Y
DG 36:4(18:0/18:4)[M+NH4]+	DG 36:4(18:0/18:4)	[M+NH4]+	6.63606	634.542	634.541	0.00073545	21	Y
DG 36:4(18:1/18:3)[M+NH4]+	DG 36:4(18:1/18:3)	[M+NH4]+	6.39383	634.542	634.541	0.00073545	21	Y
DG 36:5(18:2/18:3)[M+NH4]+	DG 36:5(18:2/18:3)	[M+NH4]+	5.89449	632.525	632.525	0.00021665	21	Y
DG 36:6(18:3/18:3)[M+NH4]+	DG 36:6(18:3/18:3)	[M+NH4]+	5.38275	630.509	630.509	6.04e-05	N	Y
DG 38:4(18:3/20:1)[M+NH4]+	DG 38:4(18:3/20:1)	[M+NH4]+	7.05237	662.575	662.572	0.0025239	N	Y
DG 40:1(16:1/24:0)[M+NH4]+	DG 40:1(16:1/24:0)	[M+NH4]+	6.76392	696.647	696.65	-0.0031663	N	Y
DG 44:3(18:3/26:0)[M+NH4]+	DG 44:3(18:3/26:0)	[M+NH4]+	9.66166	748.681	748.682	-0.0002866	21	Y
DG 44:4(18:4/26:0)[M+NH4]+	DG 44:4(18:4/26:0)	[M+NH4]+	9.17773	746.663	746.666	-0.0030582	N	Y
DGDG 32:0(16:0/16:0)[M+Na]+	DGDG 32:0(16:0/16:0)	[M+Na]+	5.79993	915.603	915.602	0.0011506	7	N
DGDG 32:0(16:0/16:0)[M+NH4]+	DGDG 32:0(16:0/16:0)	[M+NH4]+	5.78767	910.646	910.647	-0.0003304	7	N
DGDG 32:0(16:0/16:0)[M-H+HCO2H]-	DGDG 32:0(16:0/16:0)	[M-H+HCO2H]-	5.79631	937.619	937.61	0.0085752	7	Y
DGDG 32:1(16:0/16:1)[M+NH4]+	DGDG 32:1(16:0/16:1)	[M+NH4]+	5.30705	908.628	908.631	-0.0030833	7	N
DGDG 32:1(16:0/16:1)[M-H+HCO2H]-	DGDG 32:1(16:0/16:1)	[M-H+HCO2H]-	5.25526	935.6	935.594	0.00556295	7	Y
DGDG 32:2(14:0/18:2)[M-H+HCO2H]-	DGDG 32:2(14:0/18:2)	[M-H+HCO2H]-	4.72953	933.587	933.579	0.0083337	N	Y
DGDG 32:2(16:1/16:1)[M+NH4]+	DGDG 32:2(16:1/16:1)	[M+NH4]+	4.68132	906.618	906.615	0.0029223	N	Y
DGDG 32:3(14:0/18:3)[M+NH4]+	DGDG 32:3(14:0/18:3)	[M+NH4]+	4.26873	904.604	904.6	0.0047166	N	Y
DGDG 34:0(16:0/18:0)[M+Na]+	DGDG 34:0(16:0/18:0)	[M+Na]+	6.48775	943.63	943.633	-0.0034144	7	N
DGDG 34:0(16:0/18:0)[M+NH4]+	DGDG 34:0(16:0/18:0)	[M+NH4]+	6.52283	938.676	938.678	-0.002098	7	N
DGDG 34:1(16:0/18:1)[M+Na]+	DGDG 34:1(16:0/18:1)	[M+Na]+	5.78437	941.62	941.618	0.0026218	7	Y
DGDG 34:1(16:0/18:1)[M+NH4]+	DGDG 34:1(16:0/18:1)	[M+NH4]+	5.76378	936.665	936.662	0.0024454	7	Y
DGDG 34:1(16:0/18:1)[M-H]-	DGDG 34:1(16:0/18:1)	[M-H]-	5.86967	917.627	917.62	0.0070783	7	N
DGDG 34:1(16:0/18:1)[M-H+HCO2H]-	DGDG 34:1(16:0/18:1)	[M-H+HCO2H]-	5.80298	963.634	963.626	0.00868835	7	Y
DGDG 34:2(16:0/18:2)[M+Na]+	DGDG 34:2(16:0/18:2)	[M+Na]+	5.2952	939.602	939.602	-0.0001311	7	N
DGDG 34:2(16:0/18:2)[M+NH4]+	DGDG 34:2(16:0/18:2)	[M+NH4]+	5.29063	934.643	934.647	-0.0032804	7	N
DGDG 34:2(16:0/18:2)[M-H]-	DGDG 34:2(16:0/18:2)	[M-H]-	5.33498	915.614	915.604	0.0093913	7	N
DGDG 34:2(16:0/18:2)[M-H+HCO2H]-	DGDG 34:2(16:0/18:2)	[M-H+HCO2H]-	5.29127	961.615	961.61	0.0054166	7	N
DGDG 34:3(16:0/18:3)[M+Na]+	DGDG 34:3(16:0/18:3)	[M+Na]+	4.90718	937.587	937.586	0.0004882	7	N
DGDG 34:3(16:0/18:3)[M+NH4]+	DGDG 34:3(16:0/18:3)	[M+NH4]+	4.8999	932.631	932.631	-8.04e-05	7	N
DGDG 34:3(16:0/18:3)[M-H+HCO2H]-	DGDG 34:3(16:0/18:3)	[M-H+HCO2H]-	4.87409	959.601	959.594	0.00702775	7	Y
DGDG 34:3(16:1/18:2)[M+Na]+	DGDG 34:3(16:1/18:2)	[M+Na]+	4.77417	937.586	937.586	-0.0006257	N	Y
DGDG 34:3(16:1/18:2)[M+NH4]+	DGDG 34:3(16:1/18:2)	[M+NH4]+	5.10347	932.631	932.631	-8.04e-05	7	N
DGDG 34:3(16:1/18:2)[M-H+HCO2H]-	DGDG 34:3(16:1/18:2)	[M-H+HCO2H]-	4.80112	959.602	959.594	0.0081264	N	Y
DGDG 34:4(16:0/18:4)[M+NH4]+	DGDG 34:4(16:0/18:4)	[M+NH4]+	4.64152	930.614	930.615	-0.0011874	7	N
DGDG 34:4(16:1/18:3)[M+Na]+	DGDG 34:4(16:1/18:3)	[M+Na]+	4.39872	935.568	935.571	-0.0022647	7	Y
DGDG 34:4(16:1/18:3)[M+NH4]+	DGDG 34:4(16:1/18:3)	[M+NH4]+	4.37888	930.613	930.615	-0.00258865	7	Y
DGDG 34:4(16:1/18:3)[M-H+HCO2H]-	DGDG 34:4(16:1/18:3)	[M-H+HCO2H]-	4.40731	957.585	957.579	0.0065484	7	Y
DGDG 34:4(16:3/18:1)[M+Na]+	DGDG 34:4(16:3/18:1)	[M+Na]+	4.47852	935.568	935.571	-0.0026767	N	Y
DGDG 34:4(16:3/18:1)[M+NH4]+	DGDG 34:4(16:3/18:1)	[M+NH4]+	4.42062	930.611	930.615	-0.0039899	N	Y
DGDG 34:5(16:1/18:4)[M+NH4]+	DGDG 34:5(16:1/18:4)	[M+NH4]+	4.14712	928.6	928.6	0.0001389	7	N
DGDG 34:5(16:2/18:3)[M+Na]+	DGDG 34:5(16:2/18:3)	[M+Na]+	4.08572	933.552	933.555	-0.0029882	7	N
DGDG 34:5(16:2/18:3)[M+NH4]+	DGDG 34:5(16:2/18:3)	[M+NH4]+	3.97405	928.596	928.6	-0.0037368	N	Y
DGDG 34:5(16:2/18:3)[M-H+HCO2H]-	DGDG 34:5(16:2/18:3)	[M-H+HCO2H]-	4.04223	955.571	955.563	0.00759495	7	Y
DGDG 34:5(16:3/18:2)[M+NH4]+	DGDG 34:5(16:3/18:2)	[M+NH4]+	4.04072	928.6	928.6	0.0001389	7	N
DGDG 34:5(16:4/18:1)[M+NH4]+	DGDG 34:5(16:4/18:1)	[M+NH4]+	4.22397	928.596	928.6	-0.0037368	N	Y
DGDG 34:5(16:4/18:1)[M-H+HCO2H]-	DGDG 34:5(16:4/18:1)	[M-H+HCO2H]-	4.23497	955.571	955.563	0.0076255	N	Y
DGDG 34:6(16:3/18:3)[M+Na]+	DGDG 34:6(16:3/18:3)	[M+Na]+	3.71809	931.541	931.539	0.00176625	7	Y
DGDG 34:6(16:3/18:3)[M+NH4]+	DGDG 34:6(16:3/18:3)	[M+NH4]+	3.70884	926.586	926.584	0.00153135	7	Y
DGDG 34:6(16:3/18:3)[M-H+HCO2H]-	DGDG 34:6(16:3/18:3)	[M-H+HCO2H]-	3.7199	953.556	953.547	0.0082092	7	Y
DGDG 34:6(16:4/18:2)[M+NH4]+	DGDG 34:6(16:4/18:2)	[M+NH4]+	3.88897	926.584	926.584	0.0002547	7	N
DGDG 34:7(16:4/18:3)[M+Na]+	DGDG 34:7(16:4/18:3)	[M+Na]+	3.56648	929.523	929.524	-0.00048315	7	Y
DGDG 34:7(16:4/18:3)[M+NH4]+	DGDG 34:7(16:4/18:3)	[M+NH4]+	3.55414	924.568	924.568	-0.00075875	7	Y
DGDG 34:7(16:4/18:3)[M-H+HCO2H]-	DGDG 34:7(16:4/18:3)	[M-H+HCO2H]-	3.567	951.54	951.532	0.00805025	7	Y
DGDG 36:4(18:1/18:3)[M-H+HCO2H]-	DGDG 36:4(18:1/18:3)	[M-H+HCO2H]-	5.11063	985.62	985.61	0.0096279	N	Y
DGDG 36:6(18:3/18:3)[M+NH4]+	DGDG 36:6(18:3/18:3)	[M+NH4]+	4.2185	954.612	954.615	-0.003391	N	Y
DGDG 36:6(18:3/18:3)[M-H+HCO2H]-	DGDG 36:6(18:3/18:3)	[M-H+HCO2H]-	4.12885	981.586	981.579	0.0072975	N	Y
DGTS 30:3(14:0/16:3)[M+H]+	DGTS 30:3(14:0/16:3)	[M+H]+	4.08633	678.532	678.531	0.0008883	N	Y
DGTS 30:4(14:0/16:4)[M+H]+	DGTS 30:4(14:0/16:4)	[M+H]+	3.918	676.515	676.515	-0.0004905	N	Y
DGTS 32:1(16:0/16:1)[M+H]+	DGTS 32:1(16:0/16:1)	[M+H]+	5.55134	710.593	710.593	2.835e-05	10	Y
DGTS 32:1(16:0/16:1)[M-H+HCO2H]-	DGTS 32:1(16:0/16:1)	[M-H+HCO2H]-	5.65628	754.587	754.583	0.0039322	10	N
DGTS 32:2(16:0/16:2)[M+H]+	DGTS 32:2(16:0/16:2)	[M+H]+	5.122	708.578	708.578	2.98e-05	10	N
DGTS 32:3(14:0/18:3)[M+H]+	DGTS 32:3(14:0/18:3)	[M+H]+	4.54585	706.559	706.562	-0.0026918	N	Y
DGTS 32:3(16:0/16:3)[M+H]+	DGTS 32:3(16:0/16:3)	[M+H]+	4.68816	706.56	706.562	-0.0025697	10	Y
DGTS 32:4(14:0/18:4)[M+H]+	DGTS 32:4(14:0/18:4)	[M+H]+	4.29233	704.544	704.546	-0.0028796	N	Y
DGTS 32:4(16:0/16:4)[M+H]+	DGTS 32:4(16:0/16:4)	[M+H]+	4.48692	704.547	704.546	0.0001213	10	Y
DGTS 32:4(16:0/16:4)[M-H+HCO2H]-	DGTS 32:4(16:0/16:4)	[M-H+HCO2H]-	4.53408	748.539	748.536	0.002479	10	N
DGTS 32:4(16:1/16:3)[M+H]+	DGTS 32:4(16:1/16:3)	[M+H]+	4.12845	704.544	704.546	-0.0028796	N	Y
DGTS 32:5(16:1/16:4)[M+H]+	DGTS 32:5(16:1/16:4)	[M+H]+	3.94932	702.527	702.531	-0.0037091	N	Y
DGTS 32:6(16:2/16:4)[M+H]+	DGTS 32:6(16:2/16:4)	[M+H]+	3.64767	700.514	700.515	-0.0011918	N	Y
DGTS 32:7(16:3/16:4)[M+H]+	DGTS 32:7(16:3/16:4)	[M+H]+	3.39205	698.497	698.5	-0.0029063	N	Y
DGTS 33:1(16:0/17:1)[M+H]+	DGTS 33:1(16:0/17:1)	[M+H]+	5.8151	724.609	724.609	0.000346	N	Y
DGTS 33:1(16:1/17:0)[M+H]+	DGTS 33:1(16:1/17:0)	[M+H]+	5.9046	724.609	724.609	0.000346	N	Y
DGTS 33:4(16:4/17:0)[M+H]+	DGTS 33:4(16:4/17:0)	[M+H]+	4.76727	718.562	718.562	0.000299	N	Y
DGTS 34:1(16:0/18:1)[M+H]+	DGTS 34:1(16:0/18:1)	[M+H]+	6.20319	738.624	738.625	-0.0007677	10	Y
DGTS 34:1(16:0/18:1)[M-H+HCO2H]-	DGTS 34:1(16:0/18:1)	[M-H+HCO2H]-	6.26417	782.62	782.615	0.0051099	10	N
DGTS 34:2(16:0/18:2)[M+H]+	DGTS 34:2(16:0/18:2)	[M+H]+	5.77464	736.609	736.609	-0.00023545	10	Y
DGTS 34:2(16:0/18:2)[M-H+HCO2H]-	DGTS 34:2(16:0/18:2)	[M-H+HCO2H]-	5.73567	780.603	780.599	0.0044636	10	N
DGTS 34:2(16:1/18:1)[M+H]+	DGTS 34:2(16:1/18:1)	[M+H]+	5.5591	736.608	736.609	-0.0014058	N	Y
DGTS 34:3(16:0/18:3)[M+H]+	DGTS 34:3(16:0/18:3)	[M+H]+	5.29523	734.594	734.593	0.0002084	10	Y
DGTS 34:3(16:0/18:3)[M-H+HCO2H]-	DGTS 34:3(16:0/18:3)	[M-H+HCO2H]-	5.38338	778.587	778.583	0.0038375	10	N
DGTS 34:4(16:0/18:4)[M+H]+	DGTS 34:4(16:0/18:4)	[M+H]+	4.9314	732.574	732.578	-0.0033425	10	N
DGTS 34:4(16:4/18:0)[M+H]+	DGTS 34:4(16:4/18:0)	[M+H]+	5.21237	732.574	732.578	-0.0033425	10	N
DGTS 34:4(16:4/18:0)[M-H+HCO2H]-	DGTS 34:4(16:4/18:0)	[M-H+HCO2H]-	5.03868	776.572	776.568	0.0047272	10	N
DGTS 34:5(16:2/18:3)[M+H]+	DGTS 34:5(16:2/18:3)	[M+H]+	4.29507	730.559	730.562	-0.0033616	N	Y
DGTS 34:5(16:4/18:1)[M+H]+	DGTS 34:5(16:4/18:1)	[M+H]+	4.46395	730.559	730.562	-0.0033616	N	Y
DGTS 34:6(16:3/18:3)[M+H]+	DGTS 34:6(16:3/18:3)	[M+H]+	3.9887	728.548	728.546	0.0017285	N	Y
DGTS 34:7(16:3/18:4)[M+H]+	DGTS 34:7(16:3/18:4)	[M+H]+	3.69297	726.53	726.531	-0.0010345	N	Y
DGTS 34:7(16:4/18:3)[M+H]+	DGTS 34:7(16:4/18:3)	[M+H]+	3.777	726.53	726.531	-0.0010345	N	Y
DGTS 34:8(16:4/18:4)[M+H]+	DGTS 34:8(16:4/18:4)	[M+H]+	3.52367	724.513	724.515	-0.002627	N	Y
DGTS 35:1(16:0/19:1)[M+H]+	DGTS 35:1(16:0/19:1)	[M+H]+	6.58762	752.638	752.64	-0.00242	10	N
DGTS 35:3(17:0/18:3)[M+H]+	DGTS 35:3(17:0/18:3)	[M+H]+	5.75742	748.607	748.609	-0.0022785	10	N
DGTS 35:4(17:0/18:4)[M+H]+	DGTS 35:4(17:0/18:4)	[M+H]+	5.23968	746.589	746.593	-0.0043287	N	Y
DGTS 36:1(18:0/18:1)[M+H]+	DGTS 36:1(18:0/18:1)	[M+H]+	6.97338	766.655	766.656	-0.0011984	10	N
DGTS 36:2(18:0/18:2)[M+H]+	DGTS 36:2(18:0/18:2)	[M+H]+	6.33853	764.643	764.64	0.0028549	N	Y
DGTS 36:2(18:1/18:1)[M+H]+	DGTS 36:2(18:1/18:1)	[M+H]+	6.15107	764.643	764.64	0.0028549	N	Y
DGTS 36:3(18:0/18:3)[M+H]+	DGTS 36:3(18:0/18:3)	[M+H]+	5.95945	762.625	762.625	-0.00017265	10	Y
DGTS 36:3(18:1/18:2)[M+H]+	DGTS 36:3(18:1/18:2)	[M+H]+	5.74217	762.625	762.625	-0.00017265	10	Y
DGTS 36:4(18:0/18:4)[M+H]+	DGTS 36:4(18:0/18:4)	[M+H]+	5.58664	760.606	760.609	-0.00326505	10	Y
DGTS 36:4(18:1/18:3)[M+H]+	DGTS 36:4(18:1/18:3)	[M+H]+	5.35205	760.606	760.609	-0.00326505	10	Y
DGTS 36:4(18:2/18:2)[M+H]+	DGTS 36:4(18:2/18:2)	[M+H]+	5.24888	760.606	760.609	-0.00326505	10	Y
DGTS 36:5(18:1/18:4)[M+H]+	DGTS 36:5(18:1/18:4)	[M+H]+	4.9761	758.591	758.593	-0.0021181	N	Y
DGTS 36:5(18:2/18:3)[M+H]+	DGTS 36:5(18:2/18:3)	[M+H]+	4.71602	758.591	758.593	-0.0021181	N	Y
DGTS 36:6(18:2/18:4)[M+H]+	DGTS 36:6(18:2/18:4)	[M+H]+	4.50387	756.575	756.578	-0.0031315	N	Y
DGTS 36:6(18:3/18:3)[M+H]+	DGTS 36:6(18:3/18:3)	[M+H]+	4.43607	756.575	756.578	-0.00292805	10	Y
DGTS 36:7(18:3/18:4)[M+H]+	DGTS 36:7(18:3/18:4)	[M+H]+	4.17807	754.564	754.562	0.00169415	8	Y
LysoDGTS 16:0[M+H]+	LysoDGTS 16:0	[M+H]+	1.89627	474.38	474.379	0.000935	3	Y
LysoDGTS 16:0[M-H+HCO2H]-	LysoDGTS 16:0	[M-H+HCO2H]-	1.92	518.37	518.369	0.000895	10	N
LysoDGTS 16:1[M+H]+	LysoDGTS 16:1	[M+H]+	1.33741	472.365	472.364	0.00093685	3	Y
LysoDGTS 16:2[M+H]+	LysoDGTS 16:2	[M+H]+	0.971017	470.346	470.348	-0.0016787	N	Y
LysoDGTS 16:3[M+H]+	LysoDGTS 16:3	[M+H]+	0.798267	468.333	468.332	0.0002986	N	Y
LysoDGTS 16:4[M+H]+	LysoDGTS 16:4	[M+H]+	0.707333	466.318	466.317	0.0008416	N	Y
LysoDGTS 18:0[M+H]+	LysoDGTS 18:0	[M+H]+	2.84978	502.41	502.411	-0.00087525	3	Y
LysoDGTS 18:1[M+H]+	LysoDGTS 18:1	[M+H]+	1.982	500.397	500.395	0.0021015	3	Y
LysoDGTS 18:2[M+H]+	LysoDGTS 18:2	[M+H]+	1.55895	498.38	498.379	0.0003481	N	Y
LysoDGTS 18:3[M+H]+	LysoDGTS 18:3	[M+H]+	1.19673	496.361	496.364	-0.0030945	10	Y
LysoDGTS 18:4[M+H]+	LysoDGTS 18:4	[M+H]+	0.882817	494.348	494.348	-0.0004479	N	Y
MGDG 32:4(16:0/16:4)[M+Na]+	MGDG 32:4(16:0/16:4)	[M+Na]+	4.5904	745.49	745.487	0.0038365	N	Y
MGDG 32:4(16:0/16:4)[M-H+HCO2H]-	MGDG 32:4(16:0/16:4)	[M-H+HCO2H]-	4.70178	767.504	767.495	0.0096894	13	N
MGDG 32:5(16:1/16:4)[M+Na]+	MGDG 32:5(16:1/16:4)	[M+Na]+	4.08907	743.471	743.471	-0.0001066	N	Y
MGDG 32:5(16:1/16:4)[M+NH4]+	MGDG 32:5(16:1/16:4)	[M+NH4]+	4.16268	738.514	738.516	-0.0016792	13	Y
MGDG 32:5(16:1/16:4)[M-H+HCO2H]-	MGDG 32:5(16:1/16:4)	[M-H+HCO2H]-	4.15815	765.481	765.479	0.0020842	13	N
MGDG 32:6(16:2/16:4)[M-H+HCO2H]-	MGDG 32:6(16:2/16:4)	[M-H+HCO2H]-	3.77968	763.472	763.463	0.0085782	N	Y
MGDG 34:1(16:0/18:1)[M+Na]+	MGDG 34:1(16:0/18:1)	[M+Na]+	6.42347	779.565	779.565	-7.6e-06	13	N
MGDG 34:1(16:0/18:1)[M+NH4]+	MGDG 34:1(16:0/18:1)	[M+NH4]+	6.40812	774.609	774.609	-0.0002985	13	N
MGDG 34:1(16:0/18:1)[M-H+HCO2H]-	MGDG 34:1(16:0/18:1)	[M-H+HCO2H]-	6.44392	801.576	801.573	0.0028546	13	N
MGDG 34:2(16:0/18:2)[M+NH4]+	MGDG 34:2(16:0/18:2)	[M+NH4]+	5.92133	772.593	772.594	-0.0007219	13	N
MGDG 34:2(16:1/18:1)[M+Na]+	MGDG 34:2(16:1/18:1)	[M+Na]+	5.82608	777.548	777.549	-0.0007769	13	N
MGDG 34:2(16:1/18:1)[M+NH4]+	MGDG 34:2(16:1/18:1)	[M+NH4]+	5.78481	772.595	772.594	0.0008294	13	Y
MGDG 34:2(16:1/18:1)[M-H+HCO2H]-	MGDG 34:2(16:1/18:1)	[M-H+HCO2H]-	5.82124	799.562	799.557	0.00456235	13	Y
MGDG 34:3(16:1/18:2)[M+NH4]+	MGDG 34:3(16:1/18:2)	[M+NH4]+	5.49043	770.576	770.578	-0.0023762	13	Y
MGDG 34:3(16:1/18:2)[M-H+HCO2H]-	MGDG 34:3(16:1/18:2)	[M-H+HCO2H]-	5.7521	797.546	797.541	0.0043525	13	N
MGDG 34:3(16:2/18:1)[M+Na]+	MGDG 34:3(16:2/18:1)	[M+Na]+	5.32735	775.532	775.534	-0.001949	13	N
MGDG 34:3(16:2/18:1)[M+NH4]+	MGDG 34:3(16:2/18:1)	[M+NH4]+	5.32136	770.576	770.578	-0.0023762	13	Y
MGDG 34:3(16:2/18:1)[M-H+HCO2H]-	MGDG 34:3(16:2/18:1)	[M-H+HCO2H]-	5.34027	797.548	797.541	0.0062675	13	Y
MGDG 34:4(16:1/18:3)[M+Na]+	MGDG 34:4(16:1/18:3)	[M+Na]+	4.84108	773.518	773.518	-0.00012425	13	Y
MGDG 34:4(16:1/18:3)[M+NH4]+	MGDG 34:4(16:1/18:3)	[M+NH4]+	4.83425	768.56	768.563	-0.00267495	13	Y
MGDG 34:4(16:1/18:3)[M-H+HCO2H]-	MGDG 34:4(16:1/18:3)	[M-H+HCO2H]-	4.8794	795.528	795.526	0.0026525	13	N
MGDG 34:4(16:2/18:2)[M-H+HCO2H]-	MGDG 34:4(16:2/18:2)	[M-H+HCO2H]-	4.88982	795.534	795.526	0.0081151	N	Y
MGDG 34:4(16:3/18:1)[M+Na]+	MGDG 34:4(16:3/18:1)	[M+Na]+	5.09771	773.518	773.518	-0.00012425	13	Y
MGDG 34:4(16:3/18:1)[M+NH4]+	MGDG 34:4(16:3/18:1)	[M+NH4]+	5.08484	768.56	768.563	-0.00267495	13	Y
MGDG 34:4(16:3/18:1)[M-H+HCO2H]-	MGDG 34:4(16:3/18:1)	[M-H+HCO2H]-	5.13597	795.528	795.526	0.0026525	13	N
MGDG 34:5(16:1/18:4)[M+NH4]+	MGDG 34:5(16:1/18:4)	[M+NH4]+	4.57497	766.546	766.547	-0.001163	13	N
MGDG 34:5(16:2/18:3)[M+NH4]+	MGDG 34:5(16:2/18:3)	[M+NH4]+	4.48712	766.546	766.547	-0.001163	13	N
MGDG 34:5(16:3/18:2)[M+Na]+	MGDG 34:5(16:3/18:2)	[M+Na]+	4.49313	771.502	771.502	-0.0003533	13	N
MGDG 34:5(16:3/18:2)[M+NH4]+	MGDG 34:5(16:3/18:2)	[M+NH4]+	4.56132	766.543	766.547	-0.003815	N	Y
MGDG 34:5(16:3/18:2)[M-H+HCO2H]-	MGDG 34:5(16:3/18:2)	[M-H+HCO2H]-	4.49287	793.512	793.51	0.0015598	13	N
MGDG 34:5(16:4/18:1)[M+Na]+	MGDG 34:5(16:4/18:1)	[M+Na]+	4.6794	771.5	771.502	-0.0023446	13	Y
MGDG 34:5(16:4/18:1)[M+NH4]+	MGDG 34:5(16:4/18:1)	[M+NH4]+	4.64924	766.544	766.547	-0.002489	13	Y
MGDG 34:5(16:4/18:1)[M-H+HCO2H]-	MGDG 34:5(16:4/18:1)	[M-H+HCO2H]-	4.72355	793.512	793.51	0.0015598	13	N
MGDG 34:6(16:3/18:3)[M+Na]+	MGDG 34:6(16:3/18:3)	[M+Na]+	4.22095	769.485	769.487	-0.0014329	13	N
MGDG 34:6(16:3/18:3)[M+NH4]+	MGDG 34:6(16:3/18:3)	[M+NH4]+	4.19003	764.531	764.531	-0.00016735	13	Y
MGDG 34:6(16:3/18:3)[M-H+HCO2H]-	MGDG 34:6(16:3/18:3)	[M-H+HCO2H]-	4.22535	791.498	791.495	0.0030976	13	N
MGDG 34:6(16:4/18:2)[M+NH4]+	MGDG 34:6(16:4/18:2)	[M+NH4]+	4.24962	764.532	764.531	0.0011042	N	Y
MGDG 34:6(16:5/18:1)[M+NH4]+	MGDG 34:6(16:5/18:1)	[M+NH4]+	4.5073	764.53	764.531	-0.0014389	13	N
MGDG 34:7(16:4/18:3)[M+Na]+	MGDG 34:7(16:4/18:3)	[M+Na]+	3.96678	767.473	767.471	0.0016228	13	N
MGDG 34:7(16:4/18:3)[M+NH4]+	MGDG 34:7(16:4/18:3)	[M+NH4]+	3.90963	762.516	762.516	0.0007279	13	Y
MGDG 34:7(16:4/18:3)[M-H+HCO2H]-	MGDG 34:7(16:4/18:3)	[M-H+HCO2H]-	3.98385	789.481	789.479	0.0023691	13	N
MGDG 34:8(16:4/18:4)[M+Na]+	MGDG 34:8(16:4/18:4)	[M+Na]+	3.67085	765.457	765.455	0.001647	13	N
MGDG 34:8(16:4/18:4)[M+NH4]+	MGDG 34:8(16:4/18:4)	[M+NH4]+	3.65627	760.499	760.5	-0.0005411	13	N
MGDG 34:8(16:4/18:4)[M-H+HCO2H]-	MGDG 34:8(16:4/18:4)	[M-H+HCO2H]-	3.68602	787.465	787.463	0.0017422	13	N
MGDG 36:4(18:1/18:3)[M+NH4]+	MGDG 36:4(18:1/18:3)	[M+NH4]+	5.57788	796.594	796.594	6.135e-05	13	Y
MGDG 36:7(18:3/18:4)[M+NH4]+	MGDG 36:7(18:3/18:4)	[M+NH4]+	4.22943	790.546	790.547	-0.0011783	N	Y
PE 36:3(18:0/18:3)[M+H]+	PE 36:3(18:0/18:3)	[M+H]+	5.81145	742.539	742.539	-0.0001075	N	Y
PE 36:4(18:0/18:4)[M+H]+	PE 36:4(18:0/18:4)	[M+H]+	5.39267	740.526	740.523	0.003353	N	Y
PG 32:0(16:0/16:0)[M+Na]+	PG 32:0(16:0/16:0)	[M+Na]+	5.2916	745.5	745.5	0.000411	5	N
PG 32:0(16:0/16:0)[M-H]-	PG 32:0(16:0/16:0)	[M-H]-	5.28131	721.508	721.502	0.00649965	5	Y
PG 32:1(16:0/16:1)[M+Na]+	PG 32:1(16:0/16:1)	[M+Na]+	4.86473	743.488	743.484	0.0038837	5	N
PG 32:1(16:0/16:1)[M-H]-	PG 32:1(16:0/16:1)	[M-H]-	5.03392	719.492	719.486	0.0055371	5	N
PG 32:3[M+Na]+	PG 32:3	[M+Na]+	3.36457	739.454	739.453	0.0019179	5	N
PG 34:1(16:0/18:1)[M-H]-	PG 34:1(16:0/18:1)	[M-H]-	5.38162	747.525	747.518	0.007747	5	Y
PG 34:2(16:1/18:1)[M+Na]+	PG 34:2(16:1/18:1)	[M+Na]+	5.18955	769.499	769.5	-0.0009318	5	N
PG 34:2(16:1/18:1)[M-H]-	PG 34:2(16:1/18:1)	[M-H]-	5.14694	745.508	745.502	0.0065098	5	Y
PG 34:3(16:1/18:2)[M-H]-	PG 34:3(16:1/18:2)	[M-H]-	4.6643	743.493	743.486	0.00714435	5	Y
PG 34:4(16:1/18:3)[M-H]-	PG 34:4(16:1/18:3)	[M-H]-	4.27802	741.478	741.471	0.0070261	5	Y
PI 32:0[M-H]-	PI 32:0	[M-H]-	5.12213	809.516	809.518	-0.0019292	2	N
PI 33:0[M-H]-	PI 33:0	[M-H]-	5.24742	823.535	823.534	0.001038	2	N
PI 34:0[M-H]-	PI 34:0	[M-H]-	5.55102	837.55	837.549	0.000647	2	N
PI 34:1(16:0/18:1)[M-H]-	PI 34:1(16:0/18:1)	[M-H]-	5.14971	835.541	835.534	0.0068975	2	Y
PI 35:0[M-H]-	PI 35:0	[M-H]-	5.89613	851.572	851.565	0.0074577	2	N
SQDG 32:0(16:0/16:0)[M+NH4]+	SQDG 32:0(16:0/16:0)	[M+NH4]+	5.08615	812.555	812.556	-0.0009671	4	N
SQDG 32:1[M-H]-	SQDG 32:1	[M-H]-	4.6338	791.504	791.498	0.0057499	4	Y
SQDG 34:0(16:0/18:0)[M+NH4]+	SQDG 34:0(16:0/18:0)	[M+NH4]+	5.67495	840.585	840.587	-0.0023842	4	N
SQDG 34:1(16:0/18:1)[M+NH4]+	SQDG 34:1(16:0/18:1)	[M+NH4]+	5.10033	838.567	838.571	-0.0043734	4	N
SQDG 34:2[M-H]-	SQDG 34:2	[M-H]-	4.60188	817.521	817.514	0.0076292	N	Y
SQDG 34:3(16:0/18:3)[M+NH4]+	SQDG 34:3(16:0/18:3)	[M+NH4]+	4.3161	834.54	834.54	0.0001322	4	N
SQDG 34:3(16:0/18:3)[M-H]-	SQDG 34:3(16:0/18:3)	[M-H]-	4.22712	815.503	815.498	0.00547215	4	Y
SQDG 34:4[M-H]-	SQDG 34:4	[M-H]-	4.02098	813.492	813.482	0.0097239	N	Y
TG 42:0(12:0/14:0/16:0)[M+NH4]+	TG 42:0(12:0/14:0/16:0)	[M+NH4]+	9.85806	740.677	740.676	0.00057145	21	Y
TG 46:0(12:0/16:0/18:0)[M+NH4]+	TG 46:0(12:0/16:0/18:0)	[M+NH4]+	10.8138	796.738	796.739	-0.00069635	21	Y
TG 46:0(14:0/16:0/16:0)[M+NH4]+	TG 46:0(14:0/16:0/16:0)	[M+NH4]+	10.7717	796.738	796.739	-0.00069635	21	Y
TG 46:1(14:0/16:0/16:1)[M+NH4]+	TG 46:1(14:0/16:0/16:1)	[M+NH4]+	10.4301	794.722	794.723	-0.00141685	21	Y
TG 46:2(12:0/18:1/16:1)[M+NH4]+	TG 46:2(12:0/18:1/16:1)	[M+NH4]+	9.91378	792.711	792.708	0.0032375	N	Y
TG 48:0(14:0/16:0/18:0)[M+NH4]+	TG 48:0(14:0/16:0/18:0)	[M+NH4]+	11.2777	824.77	824.77	0.00025695	21	Y
TG 48:0(16:0/16:0/16:0)[M+Na]+	TG 48:0(16:0/16:0/16:0)	[M+Na]+	11.2952	829.724	829.726	-0.0025601	21	N
TG 48:0(16:0/16:0/16:0)[M+NH4]+	TG 48:0(16:0/16:0/16:0)	[M+NH4]+	11.2631	824.77	824.77	0.00025695	21	Y
TG 48:1(14:0/16:0/18:1)[M+NH4]+	TG 48:1(14:0/16:0/18:1)	[M+NH4]+	10.8585	822.753	822.755	-0.0014974	20	Y
TG 48:1(16:0/16:0/16:1)[M+NH4]+	TG 48:1(16:0/16:0/16:1)	[M+NH4]+	10.9014	822.753	822.755	-0.00140075	21	Y
TG 48:2(14:0/16:1/18:1)[M+NH4]+	TG 48:2(14:0/16:1/18:1)	[M+NH4]+	10.4712	820.738	820.739	-0.0009171	21	N
TG 48:2(16:0/16:1/16:1)[M+NH4]+	TG 48:2(16:0/16:1/16:1)	[M+NH4]+	10.4804	820.739	820.739	-0.000116	21	Y
TG 48:3(16:1/16:1/16:1)[M+NH4]+	TG 48:3(16:1/16:1/16:1)	[M+NH4]+	10.1468	818.725	818.723	0.0018587	N	Y
TG 49:0(16:0/16:0/17:0)[M+NH4]+	TG 49:0(16:0/16:0/17:0)	[M+NH4]+	11.4157	838.785	838.786	-0.0010845	21	Y
TG 49:1(16:0/16:1/17:0)[M+NH4]+	TG 49:1(16:0/16:1/17:0)	[M+NH4]+	11.1026	836.771	836.77	0.0005316	21	Y
TG 49:2(16:0/16:1/17:1)[M+NH4]+	TG 49:2(16:0/16:1/17:1)	[M+NH4]+	10.7166	834.756	834.755	0.00173745	21	Y
TG 49:2(16:1/16:1/17:0)[M+NH4]+	TG 49:2(16:1/16:1/17:0)	[M+NH4]+	10.6792	834.752	834.755	-0.002362	19	N
TG 50:0(16:0/16:0/18:0)[M+NH4]+	TG 50:0(16:0/16:0/18:0)	[M+NH4]+	11.7001	852.802	852.802	0.0004358	21	Y
TG 50:0(16:0/17:0/17:0)[M+NH4]+	TG 50:0(16:0/17:0/17:0)	[M+NH4]+	11.627	852.801	852.802	-0.0002712	21	N
TG 50:1(16:0/16:0/18:1)[M+NH4]+	TG 50:1(16:0/16:0/18:1)	[M+NH4]+	11.3193	850.787	850.786	0.00129075	21	Y
TG 50:1(16:0/16:1/18:0)[M+NH4]+	TG 50:1(16:0/16:1/18:0)	[M+NH4]+	11.3182	850.787	850.786	0.00129075	21	Y
TG 50:1(16:0/17:0/17:1)[M+NH4]+	TG 50:1(16:0/17:0/17:1)	[M+NH4]+	11.1775	850.787	850.786	0.0015756	21	N
TG 50:2(14:1/16:1/20:0)[M+NH4]+	TG 50:2(14:1/16:1/20:0)	[M+NH4]+	11.0884	848.771	848.77	0.0008724	21	N
TG 50:2(16:0/16:0/18:2)[M+NH4]+	TG 50:2(16:0/16:0/18:2)	[M+NH4]+	11.0599	848.77	848.77	0.0001857	N	Y
TG 50:2(16:0/16:1/18:1)[M+Na]+	TG 50:2(16:0/16:1/18:1)	[M+Na]+	10.8416	853.726	853.726	0.0003132	N	Y
TG 50:2(16:0/16:1/18:1)[M+NH4]+	TG 50:2(16:0/16:1/18:1)	[M+NH4]+	10.9722	848.771	848.77	0.00052905	21	Y
TG 50:2(16:1/16:1/18:0)[M+NH4]+	TG 50:2(16:1/16:1/18:0)	[M+NH4]+	10.9671	848.77	848.77	0.0001857	N	Y
TG 50:3(16:0/16:0/18:3)[M+Na]+	TG 50:3(16:0/16:0/18:3)	[M+Na]+	10.5552	851.71	851.71	0.000144	N	Y
TG 50:3(16:0/16:0/18:3)[M+NH4]+	TG 50:3(16:0/16:0/18:3)	[M+NH4]+	10.6733	846.755	846.755	0.00015005	21	Y
TG 50:3(16:0/16:1/18:2)[M+NH4]+	TG 50:3(16:0/16:1/18:2)	[M+NH4]+	10.6438	846.755	846.755	0.00015005	21	Y
TG 50:3(16:1/16:1/18:1)[M+NH4]+	TG 50:3(16:1/16:1/18:1)	[M+NH4]+	10.539	846.756	846.755	0.0012289	19	N
TG 50:4(16:0/16:1/18:3)[M+NH4]+	TG 50:4(16:0/16:1/18:3)	[M+NH4]+	10.3573	844.739	844.739	0.00012305	21	Y
TG 50:5(16:1/16:1/18:3)[M+NH4]+	TG 50:5(16:1/16:1/18:3)	[M+NH4]+	9.80155	842.725	842.723	0.001874	N	Y
TG 51:0(16:0/17:0/18:0)[M+NH4]+	TG 51:0(16:0/17:0/18:0)	[M+NH4]+	11.7837	866.82	866.817	0.0026242	21	Y
TG 51:1(16:0/17:0/18:1)[M+NH4]+	TG 51:1(16:0/17:0/18:1)	[M+NH4]+	11.4593	864.801	864.802	-0.00053565	21	Y
TG 51:1(16:0/17:1/18:0)[M+NH4]+	TG 51:1(16:0/17:1/18:0)	[M+NH4]+	11.4648	864.801	864.802	-0.0008103	N	Y
TG 51:2(16:0/17:0/18:2)[M+NH4]+	TG 51:2(16:0/17:0/18:2)	[M+NH4]+	11.0513	862.789	862.786	0.0028573	21	N
TG 51:2(16:0/17:1/18:1)[M+NH4]+	TG 51:2(16:0/17:1/18:1)	[M+NH4]+	11.0747	862.784	862.786	-0.0022544	19	Y
TG 51:2(16:1/17:0/18:1)[M+NH4]+	TG 51:2(16:1/17:0/18:1)	[M+NH4]+	11.0525	862.789	862.786	0.0028573	21	N
TG 51:2(16:1/17:1/18:0)[M+NH4]+	TG 51:2(16:1/17:1/18:0)	[M+NH4]+	11.0277	862.782	862.786	-0.0037345	N	Y
TG 52:0(16:0/18:0/18:0)[M+NH4]+	TG 52:0(16:0/18:0/18:0)	[M+NH4]+	11.9441	880.833	880.833	0.000574	21	Y
TG 52:1(16:0/16:1/20:0)[M+NH4]+	TG 52:1(16:0/16:1/20:0)	[M+NH4]+	11.7624	878.816	878.817	-0.0007022	20	N
TG 52:1(16:0/18:0/18:1)[M+NH4]+	TG 52:1(16:0/18:0/18:1)	[M+NH4]+	11.6424	878.818	878.817	0.0010678	21	Y
TG 52:2(16:0/18:1/18:1)[M+NH4]+	TG 52:2(16:0/18:1/18:1)	[M+NH4]+	11.3991	876.804	876.802	0.0020914	21	Y
TG 52:3(16:0/18:0/18:3)[M+NH4]+	TG 52:3(16:0/18:0/18:3)	[M+NH4]+	11.0709	874.786	874.786	9.805e-05	21	Y
TG 52:3(16:0/18:1/18:2)[M+NH4]+	TG 52:3(16:0/18:1/18:2)	[M+NH4]+	11.0204	874.786	874.786	9.805e-05	21	Y
TG 52:3(16:1/18:0/18:2)[M+NH4]+	TG 52:3(16:1/18:0/18:2)	[M+NH4]+	10.9841	874.786	874.786	0.0003142	21	N
TG 52:3(16:1/18:1/18:1)[M+NH4]+	TG 52:3(16:1/18:1/18:1)	[M+NH4]+	10.9516	874.789	874.786	0.0026132	22	N
TG 52:4(16:0/18:1/18:3)[M+NH4]+	TG 52:4(16:0/18:1/18:3)	[M+NH4]+	10.6816	872.771	872.77	0.0009029	21	Y
TG 52:4(16:0/18:2/18:2)[M+NH4]+	TG 52:4(16:0/18:2/18:2)	[M+NH4]+	10.6154	872.767	872.77	-0.0027439	20	N
TG 52:4(16:1/18:0/18:3)[M+NH4]+	TG 52:4(16:1/18:0/18:3)	[M+NH4]+	10.6305	872.77	872.77	-0.0002873	21	N
TG 52:4(16:1/18:1/18:2)[M+NH4]+	TG 52:4(16:1/18:1/18:2)	[M+NH4]+	10.5239	872.77	872.77	-0.0002873	21	N
TG 52:5(16:0/18:2/18:3)[M+NH4]+	TG 52:5(16:0/18:2/18:3)	[M+NH4]+	10.2266	870.754	870.755	-0.00078785	21	Y
TG 52:5(16:1/18:1/18:3)[M+NH4]+	TG 52:5(16:1/18:1/18:3)	[M+NH4]+	10.3799	870.756	870.755	0.0017019	N	Y
TG 52:6(16:0/18:3/18:3)[M+NH4]+	TG 52:6(16:0/18:3/18:3)	[M+NH4]+	9.79415	868.743	868.739	0.0036453	N	Y
TG 52:6(16:1/18:2/18:3)[M+NH4]+	TG 52:6(16:1/18:2/18:3)	[M+NH4]+	10.0436	868.74	868.739	0.0010055	21	Y
TG 52:7(16:1/18:3/18:3)[M+NH4]+	TG 52:7(16:1/18:3/18:3)	[M+NH4]+	9.65602	866.722	866.723	-0.0014738	N	Y
TG 53:0(16:0/18:0/19:0)[M+NH4]+	TG 53:0(16:0/18:0/19:0)	[M+NH4]+	12.0081	894.851	894.848	0.0025521	19	N
TG 53:0(17:0/18:0/18:0)[M+NH4]+	TG 53:0(17:0/18:0/18:0)	[M+NH4]+	11.9823	894.853	894.848	0.0041391	22	N
TG 54:0(16:0/18:0/20:0)[M+NH4]+	TG 54:0(16:0/18:0/20:0)	[M+NH4]+	12.0498	908.864	908.864	-8.63e-05	19	N
TG 54:0(18:0/18:0/18:0)[M+NH4]+	TG 54:0(18:0/18:0/18:0)	[M+NH4]+	12.0303	908.866	908.864	0.0016837	21	N
TG 54:1(16:0/18:0/20:1)[M+NH4]+	TG 54:1(16:0/18:0/20:1)	[M+NH4]+	11.9322	906.849	906.848	0.0004159	19	N
TG 54:1(16:0/18:1/20:0)[M+NH4]+	TG 54:1(16:0/18:1/20:0)	[M+NH4]+	11.8715	906.85	906.848	0.0019418	N	Y
TG 54:1(16:1/18:0/20:0)[M+NH4]+	TG 54:1(16:1/18:0/20:0)	[M+NH4]+	11.9059	906.85	906.848	0.0019418	N	Y
TG 54:1(18:0/18:0/18:1)[M+NH4]+	TG 54:1(18:0/18:0/18:1)	[M+NH4]+	11.9138	906.85	906.848	0.0016061	21	Y
TG 54:2(18:0/18:1/18:1)[M+NH4]+	TG 54:2(18:0/18:1/18:1)	[M+NH4]+	11.6646	904.834	904.833	0.00119965	21	Y
TG 54:3(18:0/18:1/18:2)[M+NH4]+	TG 54:3(18:0/18:1/18:2)	[M+NH4]+	11.3733	902.817	902.817	7.35e-06	21	Y
TG 54:3(18:1/18:1/18:1)[M+NH4]+	TG 54:3(18:1/18:1/18:1)	[M+NH4]+	11.395	902.817	902.817	7.35e-06	21	Y
TG 54:4(18:0/18:1/18:3)[M+NH4]+	TG 54:4(18:0/18:1/18:3)	[M+NH4]+	11.0218	900.801	900.802	-0.0004339	N	Y
TG 54:4(18:1/18:1/18:2)[M+NH4]+	TG 54:4(18:1/18:1/18:2)	[M+NH4]+	10.9838	900.801	900.802	-0.0002101	21	Y
TG 54:5(18:0/18:2/18:3)[M+NH4]+	TG 54:5(18:0/18:2/18:3)	[M+NH4]+	10.6211	898.784	898.786	-0.00199495	19	Y
TG 54:5(18:1/18:2/18:2)[M+NH4]+	TG 54:5(18:1/18:2/18:2)	[M+NH4]+	10.6284	898.782	898.786	-0.0040396	20	N
TG 54:6(18:0/18:3/18:3)[M+NH4]+	TG 54:6(18:0/18:3/18:3)	[M+NH4]+	10.4713	896.772	896.77	0.0016964	N	Y
TG 54:7(18:1/18:3/18:3)[M+NH4]+	TG 54:7(18:1/18:3/18:3)	[M+NH4]+	10.0862	894.758	894.755	0.0032369	N	Y
TG 54:8(18:2/18:3/18:3)[M+NH4]+	TG 54:8(18:2/18:3/18:3)	[M+NH4]+	9.5523	892.736	892.739	-0.0032334	N	Y
TG 54:9(18:3/18:3/18:3)[M+NH4]+	TG 54:9(18:3/18:3/18:3)	[M+NH4]+	9.11448	890.72	890.723	-0.0033903	N	Y
TG 56:0(16:0/18:0/22:0)[M+NH4]+	TG 56:0(16:0/18:0/22:0)	[M+NH4]+	12.122	936.897	936.895	0.0016337	22	Y
TG 56:2(16:0/18:1/22:1)[M+NH4]+	TG 56:2(16:0/18:1/22:1)	[M+NH4]+	11.908	932.864	932.864	0.00029515	20	Y
TG 56:2(16:1/18:1/22:0)[M+NH4]+	TG 56:2(16:1/18:1/22:0)	[M+NH4]+	11.9254	932.867	932.864	0.0028434	22	N
TG 58:2(18:0/18:1/22:1)[M+NH4]+	TG 58:2(18:0/18:1/22:1)	[M+NH4]+	12.0475	960.898	960.895	0.00276285	21	Y
TG 58:2(18:0/18:2/22:0)[M+NH4]+	TG 58:2(18:0/18:2/22:0)	[M+NH4]+	12.0432	960.899	960.895	0.0033427	N	Y
TG 58:2(18:1/18:1/22:0)[M+NH4]+	TG 58:2(18:1/18:1/22:0)	[M+NH4]+	12.0519	960.898	960.895	0.002183	21	N
TG 58:3(18:1/20:1/20:1)[M+NH4]+	TG 58:3(18:1/20:1/20:1)	[M+NH4]+	11.9794	958.881	958.88	0.0010373	20	N
TG 60:2(18:1/20:0/22:1)[M+NH4]+	TG 60:2(18:1/20:0/22:1)	[M+NH4]+	12.1563	988.927	988.927	0.0006071	19	N
TG 60:3(18:1/20:1/22:1)[M+NH4]+	TG 60:3(18:1/20:1/22:1)	[M+NH4]+	12.0577	986.912	986.911	0.0012925	20	N
TG 62:3(18:1/22:0/22:2)[M+NH4]+	TG 62:3(18:1/22:0/22:2)	[M+NH4]+	12.3483	1014.94	1014.94	0.0019342	21	N
TG 62:3(18:1/22:1/22:1)[M+NH4]+	TG 62:3(18:1/22:1/22:1)	[M+NH4]+	12.2436	1014.94	1014.94	0.0006118	21	Y
TG 62:3(20:1/20:1/22:1)[M+NH4]+	TG 62:3(20:1/20:1/22:1)	[M+NH4]+	12.3471	1014.94	1014.94	0.0019342	21	N
TG 62:4(18:2/22:1/22:1)[M+NH4]+	TG 62:4(18:2/22:1/22:1)	[M+NH4]+	12.0203	1012.93	1012.93	0.0028654	21	N
TG 62:5(18:3/22:1/22:1)[M+NH4]+	TG 62:5(18:3/22:1/22:1)	[M+NH4]+	11.9239	1010.91	1010.91	0.0014756	21	N
TG 64:3(20:1/22:1/22:1)[M+NH4]+	TG 64:3(20:1/22:1/22:1)	[M+NH4]+	12.1994	1042.97	1042.97	0.0007652	19	N

## Sheet: Table S2
Table S2. Detailed Information of all lipids annotated in Auxenochlorella protothecoides (UTEX 2341)
In TLC fraction and total extract columns, "Y" means found while "N" means not found. Fraction numbers refer to the numbers in Fig S1B.
Precursor	Lipid	Adduct	RT (min)	Experimental m/z	Calculated m/z	Error	TLC fraction	Total extract
DG 32:3(16:0/16:3)[M+NH4]+	DG 32:3(16:0/16:3)	[M+NH4]+	5.3045	580.494	580.494	-0.0005397	N	Y
DG 34:1(16:0/18:1)[M+NH4]+	DG 34:1(16:0/18:1)	[M+NH4]+	6.91866	612.556	612.557	-0.000329	19	Y
DG 34:2(16:0/18:2)[M+NH4]+	DG 34:2(16:0/18:2)	[M+NH4]+	6.36394	610.542	610.541	0.00126395	19	Y
DG 34:3(16:0/18:3)[M+NH4]+	DG 34:3(16:0/18:3)	[M+NH4]+	5.86493	608.526	608.525	0.0006	N	Y
DG 34:4(16:1/18:3)[M+NH4]+	DG 34:4(16:1/18:3)	[M+NH4]+	5.33755	606.51	606.509	0.0009	N	Y
DG 34:5(16:3/18:2)[M+NH4]+	DG 34:5(16:3/18:2)	[M+NH4]+	4.9157	604.494	604.494	-0.0004087	N	Y
DG 36:3(18:1/18:2)[M+NH4]+	DG 36:3(18:1/18:2)	[M+NH4]+	6.43587	636.558	636.556	0.0018	N	Y
DG 36:4(18:2/18:2)[M+NH4]+	DG 36:4(18:2/18:2)	[M+NH4]+	5.90901	634.542	634.541	0.0005	N	Y
DG 36:5(18:2/18:3)[M+NH4]+	DG 36:5(18:2/18:3)	[M+NH4]+	5.4638	632.526	632.525	0.0009	N	Y
DG 36:6(18:3/18:3)[M+NH4]+	DG 36:6(18:3/18:3)	[M+NH4]+	5.00237	630.511	630.509	0.0016	N	Y
DGDG 32:0(16:0/16:0)[M-H+HCO2H]-	DGDG 32:0(16:0/16:0)	[M-H+HCO2H]-	5.75347	937.616	937.61	0.0062101	8	N
DGDG 32:1(14:0/18:1)[M-H+HCO2H]-	DGDG 32:1(14:0/18:1)	[M-H+HCO2H]-	5.1593	935.592	935.594	-0.0022496	8	N
DGDG 32:1(16:0/16:1)[M+Na]+	DGDG 32:1(16:0/16:1)	[M+Na]+	4.909	913.59	913.586	0.0036163	8	N
DGDG 32:1(16:0/16:1)[M+NH4]+	DGDG 32:1(16:0/16:1)	[M+NH4]+	4.90545	908.633	908.631	0.0024709	8	N
DGDG 32:2(14:0/18:2)[M+Na]+	DGDG 32:2(14:0/18:2)	[M+Na]+	4.50798	911.572	911.571	0.0007718	N	Y
DGDG 32:2(14:0/18:2)[M+NH4]+	DGDG 32:2(14:0/18:2)	[M+NH4]+	4.42649	906.618	906.615	0.0028613	8	Y
DGDG 32:2(14:0/18:2)[M-H+HCO2H]-	DGDG 32:2(14:0/18:2)	[M-H+HCO2H]-	4.6207	933.58	933.579	0.0013757	8	Y
DGDG 32:3(14:0/18:3)[M-H+HCO2H]-	DGDG 32:3(14:0/18:3)	[M-H+HCO2H]-	4.26325	931.564	931.563	0.0005454	8	Y
DGDG 34:1(16:0/18:1)[M+Na]+	DGDG 34:1(16:0/18:1)	[M+Na]+	5.51607	941.62	941.618	0.0026523	N	Y
DGDG 34:1(16:0/18:1)[M+NH4]+	DGDG 34:1(16:0/18:1)	[M+NH4]+	5.51244	936.665	936.662	0.00243775	8	Y
DGDG 34:1(16:0/18:1)[M-H]-	DGDG 34:1(16:0/18:1)	[M-H]-	5.80538	917.62	917.62	-0.0001239	8	N
DGDG 34:1(16:0/18:1)[M-H+HCO2H]-	DGDG 34:1(16:0/18:1)	[M-H+HCO2H]-	5.8876	963.625	963.626	-0.0004669	8	N
DGDG 34:2(16:0/18:2)[M+Na]+	DGDG 34:2(16:0/18:2)	[M+Na]+	4.99202	939.603	939.602	0.0014253	8	Y
DGDG 34:2(16:0/18:2)[M+NH4]+	DGDG 34:2(16:0/18:2)	[M+NH4]+	4.98245	934.648	934.647	0.0011115	8	Y
DGDG 34:2(16:0/18:2)[M-H]-	DGDG 34:2(16:0/18:2)	[M-H]-	5.23973	915.605	915.604	0.0005564	8	Y
DGDG 34:2(16:0/18:2)[M-H+HCO2H]-	DGDG 34:2(16:0/18:2)	[M-H+HCO2H]-	5.17603	961.61	961.61	0.00025615	8	Y
DGDG 34:3(16:0/18:3)[M+Na]+	DGDG 34:3(16:0/18:3)	[M+Na]+	4.55324	937.587	937.586	0.0010833	8	Y
DGDG 34:3(16:0/18:3)[M+NH4]+	DGDG 34:3(16:0/18:3)	[M+NH4]+	4.61476	932.633	932.631	0.00185035	8	Y
DGDG 34:3(16:0/18:3)[M-H]-	DGDG 34:3(16:0/18:3)	[M-H]-	4.90442	913.589	913.589	0.0001687	8	N
DGDG 34:3(16:0/18:3)[M-H+HCO2H]-	DGDG 34:3(16:0/18:3)	[M-H+HCO2H]-	4.79147	959.596	959.594	0.0015346	8	Y
DGDG 34:3(16:1/18:2)[M+Na]+	DGDG 34:3(16:1/18:2)	[M+Na]+	4.49323	937.588	937.586	0.0019073	8	N
DGDG 34:3(16:1/18:2)[M+NH4]+	DGDG 34:3(16:1/18:2)	[M+NH4]+	4.49378	932.633	932.631	0.00185035	8	Y
DGDG 34:3(16:1/18:2)[M-H]-	DGDG 34:3(16:1/18:2)	[M-H]-	4.797	913.589	913.589	0.0001687	8	N
DGDG 34:3(16:1/18:2)[M-H+HCO2H]-	DGDG 34:3(16:1/18:2)	[M-H+HCO2H]-	4.68757	959.596	959.594	0.0015346	8	Y
DGDG 34:3(16:2/18:1)[M+Na]+	DGDG 34:3(16:2/18:1)	[M+Na]+	4.68795	937.588	937.586	0.0019073	8	N
DGDG 34:3(16:2/18:1)[M+NH4]+	DGDG 34:3(16:2/18:1)	[M+NH4]+	4.66712	932.633	932.631	0.0023211	8	N
DGDG 34:4(16:1/18:3)[M+Na]+	DGDG 34:4(16:1/18:3)	[M+Na]+	4.14384	935.572	935.571	0.0009549	8	Y
DGDG 34:4(16:1/18:3)[M+NH4]+	DGDG 34:4(16:1/18:3)	[M+NH4]+	4.14111	930.617	930.615	0.0012439	8	Y
DGDG 34:4(16:2/18:2)[M+Na]+	DGDG 34:4(16:2/18:2)	[M+Na]+	4.24555	935.572	935.571	0.0008328	8	N
DGDG 34:4(16:2/18:2)[M+NH4]+	DGDG 34:4(16:2/18:2)	[M+NH4]+	4.24184	930.617	930.615	0.0012439	8	Y
DGDG 34:4(16:2/18:2)[M-H]-	DGDG 34:4(16:2/18:2)	[M-H]-	4.28203	911.571	911.573	-0.0021875	N	Y
DGDG 34:5(16:2/18:3)[M+NH4]+	DGDG 34:5(16:2/18:3)	[M+NH4]+	3.85613	928.601	928.6	0.001619	8	Y
DGDG 34:5(16:2/18:3)[M-H+HCO2H]-	DGDG 34:5(16:2/18:3)	[M-H+HCO2H]-	3.91477	955.561	955.563	-0.0016824	N	Y
DGDG 34:5(16:3/18:2)[M+Na]+	DGDG 34:5(16:3/18:2)	[M+Na]+	3.85488	933.555	933.555	-0.00033315	8	Y
DGDG 34:5(16:3/18:2)[M+NH4]+	DGDG 34:5(16:3/18:2)	[M+NH4]+	3.8199	928.603	928.6	0.0032517	8	N
DGDG 34:5(16:3/18:2)[M-H]-	DGDG 34:5(16:3/18:2)	[M-H]-	4.08592	909.557	909.558	-0.0001492	8	N
DGDG 34:6(16:3/18:3)[M+Na]+	DGDG 34:6(16:3/18:3)	[M+Na]+	3.56918	931.542	931.539	0.0021019	N	Y
DGDG 34:6(16:3/18:3)[M-H+HCO2H]-	DGDG 34:6(16:3/18:3)	[M-H+HCO2H]-	3.69721	953.548	953.547	0.00032545	8	Y
DGDG 36:1(18:0/18:1)[M-H+HCO2H]-	DGDG 36:1(18:0/18:1)	[M-H+HCO2H]-	6.45565	991.656	991.657	-0.0010062	8	N
DGDG 36:2(18:0/18:2)[M+NH4]+	DGDG 36:2(18:0/18:2)	[M+NH4]+	5.64507	962.681	962.678	0.00290245	8	Y
DGDG 36:2(18:0/18:2)[M-H]-	DGDG 36:2(18:0/18:2)	[M-H]-	5.9946	943.639	943.636	0.0036343	8	N
DGDG 36:2(18:1/18:1)[M+Na]+	DGDG 36:2(18:1/18:1)	[M+Na]+	5.61307	967.637	967.633	0.003847	8	N
DGDG 36:2(18:1/18:1)[M+NH4]+	DGDG 36:2(18:1/18:1)	[M+NH4]+	5.56202	962.682	962.678	0.0043215	8	N
DGDG 36:2(18:1/18:1)[M-H+HCO2H]-	DGDG 36:2(18:1/18:1)	[M-H+HCO2H]-	5.89468	989.643	989.641	0.0015009	8	N
DGDG 36:3(18:1/18:2)[M+Na]+	DGDG 36:3(18:1/18:2)	[M+Na]+	5.41965	966.628	966.626	0.00218105	8	Y
DGDG 36:3(18:1/18:2)[M+NH4]+	DGDG 36:3(18:1/18:2)	[M+NH4]+	5.07409	960.664	960.662	0.00184405	8	Y
DGDG 36:3(18:1/18:2)[M-H]-	DGDG 36:3(18:1/18:2)	[M-H]-	5.38617	941.619	941.62	-0.0014066	8	N
DGDG 36:3(18:1/18:2)[M-H+HCO2H]-	DGDG 36:3(18:1/18:2)	[M-H+HCO2H]-	5.27803	987.625	987.626	-0.00037635	8	Y
DGDG 36:4(18:2/18:2)[M+Na]+	DGDG 36:4(18:2/18:2)	[M+Na]+	4.60564	963.605	963.602	0.00279585	8	Y
DGDG 36:4(18:2/18:2)[M+NH4]+	DGDG 36:4(18:2/18:2)	[M+NH4]+	4.59563	958.651	958.647	0.004168	8	Y
DGDG 36:4(18:2/18:2)[M-H]-	DGDG 36:4(18:2/18:2)	[M-H]-	4.82005	939.604	939.604	-0.00068485	8	Y
DGDG 36:4(18:2/18:2)[M-H+HCO2H]-	DGDG 36:4(18:2/18:2)	[M-H+HCO2H]-	4.80678	985.61	985.61	0.0004014	8	Y
DGDG 36:5(18:2/18:3)[M+Na]+	DGDG 36:5(18:2/18:3)	[M+Na]+	4.33052	961.59	961.586	0.0036779	N	Y
DGDG 36:5(18:2/18:3)[M+NH4]+	DGDG 36:5(18:2/18:3)	[M+NH4]+	4.23295	956.635	956.631	0.0035725	N	Y
DGDG 36:5(18:2/18:3)[M-H]-	DGDG 36:5(18:2/18:3)	[M-H]-	4.43127	937.589	937.589	0.0006728	8	Y
DGDG 36:5(18:2/18:3)[M-H+HCO2H]-	DGDG 36:5(18:2/18:3)	[M-H+HCO2H]-	4.41937	983.595	983.594	0.00081295	8	Y
DGDG 36:6(18:2/18:4)[M+Na]+	DGDG 36:6(18:2/18:4)	[M+Na]+	3.91832	959.573	959.571	0.0024822	8	N
DGDG 36:6(18:2/18:4)[M+NH4]+	DGDG 36:6(18:2/18:4)	[M+NH4]+	3.89317	954.618	954.615	0.0031245	8	N
DGDG 36:6(18:3/18:3)[M+Na]+	DGDG 36:6(18:3/18:3)	[M+Na]+	3.97652	959.573	959.571	0.002589	8	Y
DGDG 36:6(18:3/18:3)[M+NH4]+	DGDG 36:6(18:3/18:3)	[M+NH4]+	4.07152	954.617	954.615	0.0021159	8	Y
DGDG 36:6(18:3/18:3)[M-H]-	DGDG 36:6(18:3/18:3)	[M-H]-	4.08564	935.573	935.573	5.69e-05	8	Y
DGDG 36:6(18:3/18:3)[M-H+HCO2H]-	DGDG 36:6(18:3/18:3)	[M-H+HCO2H]-	4.05673	981.58	981.579	0.00116145	8	Y
LysoPC 16:0[M+H]+	LysoPC 16:0	[M+H]+	1.36393	496.34	496.34	0.0001543	N	Y
LysoPC 18:1[M+H]+	LysoPC 18:1	[M+H]+	1.4926	522.356	522.356	-0.0004302	N	Y
LysoPC 18:2[M+H]+	LysoPC 18:2	[M+H]+	1.0871	520.339	520.34	-0.0010252	N	Y
LysoPC 18:3[M+H]+	LysoPC 18:3	[M+H]+	0.788633	518.324	518.325	-0.0003295	N	Y
LysoPE 18:2[M+H]+	LysoPE 18:2	[M+H]+	1.14147	478.293	478.293	-0.0001315	N	Y
LysoPE 18:2[M-H]-	LysoPE 18:2	[M-H]-	1.30817	476.28	476.278	0.0025429	N	Y
MGDG 32:1(16:0/16:1)[M-H+HCO2H]-	MGDG 32:1(16:0/16:1)	[M-H+HCO2H]-	5.60518	773.539	773.541	-0.0019799	13	N
MGDG 32:2(14:0/18:2)[M+Na]+	MGDG 32:2(14:0/18:2)	[M+Na]+	4.86487	749.518	749.518	-0.0002707	13	Y
MGDG 32:2(14:0/18:2)[M+NH4]+	MGDG 32:2(14:0/18:2)	[M+NH4]+	4.85232	744.561	744.563	-0.0014466	13	N
MGDG 32:2(14:0/18:2)[M-H+HCO2H]-	MGDG 32:2(14:0/18:2)	[M-H+HCO2H]-	5.03358	771.526	771.526	-6.355e-05	13	Y
MGDG 32:3(14:0/18:3)[M+NH4]+	MGDG 32:3(14:0/18:3)	[M+NH4]+	4.48203	742.548	742.547	0.0013547	13	Y
MGDG 32:3(14:0/18:3)[M-H+HCO2H]-	MGDG 32:3(14:0/18:3)	[M-H+HCO2H]-	4.63082	769.51	769.51	0.0002353	13	Y
MGDG 32:4(16:1/16:3)[M-H+HCO2H]-	MGDG 32:4(16:1/16:3)	[M-H+HCO2H]-	4.27517	767.495	767.495	0.00062575	13	Y
MGDG 32:5(14:2/18:3)[M-H+HCO2H]-	MGDG 32:5(14:2/18:3)	[M-H+HCO2H]-	3.92303	765.472	765.479	-0.0065828	N	Y
MGDG 32:6(14:3/18:3)[M-H+HCO2H]-	MGDG 32:6(14:3/18:3)	[M-H+HCO2H]-	3.62062	763.456	763.463	-0.0068637	N	Y
MGDG 34:1(16:0/18:1)[M+Na]+	MGDG 34:1(16:0/18:1)	[M+Na]+	5.99693	779.567	779.565	0.0021896	13	N
MGDG 34:1(16:0/18:1)[M+NH4]+	MGDG 34:1(16:0/18:1)	[M+NH4]+	5.99137	774.612	774.609	0.0020513	13	N
MGDG 34:1(16:0/18:1)[M-H+HCO2H]-	MGDG 34:1(16:0/18:1)	[M-H+HCO2H]-	6.24103	801.575	801.573	0.0022442	13	N
MGDG 34:2(16:0/18:2)[M+Na]+	MGDG 34:2(16:0/18:2)	[M+Na]+	5.48147	777.551	777.549	0.0017052	13	Y
MGDG 34:2(16:0/18:2)[M+NH4]+	MGDG 34:2(16:0/18:2)	[M+NH4]+	5.49276	772.593	772.594	-0.0005566	13	Y
MGDG 34:2(16:0/18:2)[M-H+HCO2H]-	MGDG 34:2(16:0/18:2)	[M-H+HCO2H]-	5.64702	799.555	799.557	-0.00167345	13	Y
MGDG 34:3(16:0/18:3)[M+Na]+	MGDG 34:3(16:0/18:3)	[M+Na]+	5.04606	775.536	775.534	0.0026602	13	Y
MGDG 34:3(16:0/18:3)[M+NH4]+	MGDG 34:3(16:0/18:3)	[M+NH4]+	5.07353	770.58	770.578	0.0020896	13	Y
MGDG 34:3(16:0/18:3)[M-H+HCO2H]-	MGDG 34:3(16:0/18:3)	[M-H+HCO2H]-	5.22041	797.542	797.541	7.25e-05	13	Y
MGDG 34:3(16:1/18:2)[M+Na]+	MGDG 34:3(16:1/18:2)	[M+Na]+	4.94572	775.536	775.534	0.0026602	13	Y
MGDG 34:3(16:1/18:2)[M+NH4]+	MGDG 34:3(16:1/18:2)	[M+NH4]+	4.93935	770.58	770.578	0.0020896	13	Y
MGDG 34:3(16:1/18:2)[M-H+HCO2H]-	MGDG 34:3(16:1/18:2)	[M-H+HCO2H]-	5.12351	797.542	797.541	7.25e-05	13	Y
MGDG 34:4(16:1/18:3)[M+NH4]+	MGDG 34:4(16:1/18:3)	[M+NH4]+	4.51838	768.563	768.563	0.0003234	13	Y
MGDG 34:4(16:1/18:3)[M-H+HCO2H]-	MGDG 34:4(16:1/18:3)	[M-H+HCO2H]-	4.64427	795.526	795.526	-0.0002772	N	Y
MGDG 34:4(16:2/18:2)[M+Na]+	MGDG 34:4(16:2/18:2)	[M+Na]+	4.53433	773.518	773.518	0.0003701	N	Y
MGDG 34:4(16:2/18:2)[M+NH4]+	MGDG 34:4(16:2/18:2)	[M+NH4]+	4.59822	768.563	768.563	0.0003234	13	Y
MGDG 34:4(16:2/18:2)[M-H]-	MGDG 34:4(16:2/18:2)	[M-H]-	4.81463	749.52	749.52	-0.000514	13	N
MGDG 34:4(16:2/18:2)[M-H+HCO2H]-	MGDG 34:4(16:2/18:2)	[M-H+HCO2H]-	4.73035	795.526	795.526	-0.0002772	N	Y
MGDG 34:5(16:2/18:3)[M+Na]+	MGDG 34:5(16:2/18:3)	[M+Na]+	4.18701	771.503	771.502	0.00026465	13	Y
MGDG 34:5(16:2/18:3)[M+NH4]+	MGDG 34:5(16:2/18:3)	[M+NH4]+	4.17019	766.547	766.547	-0.00013815	13	Y
MGDG 34:5(16:3/18:2)[M+Na]+	MGDG 34:5(16:3/18:2)	[M+Na]+	4.2689	771.502	771.502	-0.0004754	13	N
MGDG 34:5(16:3/18:2)[M+NH4]+	MGDG 34:5(16:3/18:2)	[M+NH4]+	4.29792	766.547	766.547	-0.00013815	13	Y
MGDG 34:6(16:2/18:4)[M+Na]+	MGDG 34:6(16:2/18:4)	[M+Na]+	3.87832	769.486	769.487	-0.0002528	13	N
MGDG 34:6(16:2/18:4)[M+NH4]+	MGDG 34:6(16:2/18:4)	[M+NH4]+	3.86737	764.531	764.531	-5.54e-05	13	N
MGDG 34:6(16:3/18:3)[M+Na]+	MGDG 34:6(16:3/18:3)	[M+Na]+	3.90571	769.486	769.487	-0.00034435	13	Y
MGDG 34:6(16:3/18:3)[M+NH4]+	MGDG 34:6(16:3/18:3)	[M+NH4]+	3.9447	764.531	764.531	0.00017855	13	Y
MGDG 34:6(16:3/18:3)[M-H]-	MGDG 34:6(16:3/18:3)	[M-H]-	4.10395	745.49	745.489	0.0011213	13	N
MGDG 34:6(16:3/18:3)[M-H+HCO2H]-	MGDG 34:6(16:3/18:3)	[M-H+HCO2H]-	3.98722	791.495	791.495	0.0008495	13	Y
MGDG 34:7(16:4/18:3)[M+NH4]+	MGDG 34:7(16:4/18:3)	[M+NH4]+	3.73823	762.515	762.516	-0.0003974	N	Y
MGDG 34:7(16:4/18:3)[M-H+HCO2H]-	MGDG 34:7(16:4/18:3)	[M-H+HCO2H]-	3.85726	789.479	789.479	0.00030405	13	Y
MGDG 34:8(16:5/18:3)[M-H+HCO2H]-	MGDG 34:8(16:5/18:3)	[M-H+HCO2H]-	3.70355	787.465	787.463	0.0018033	N	Y
MGDG 36:2(18:1/18:1)[M+Na]+	MGDG 36:2(18:1/18:1)	[M+Na]+	6.09153	805.58	805.581	-0.0009474	13	N
MGDG 36:2(18:1/18:1)[M+NH4]+	MGDG 36:2(18:1/18:1)	[M+NH4]+	6.18585	800.624	800.625	-0.0011162	N	Y
MGDG 36:2(18:1/18:1)[M-H+HCO2H]-	MGDG 36:2(18:1/18:1)	[M-H+HCO2H]-	6.34332	827.587	827.588	-0.0010555	13	N
MGDG 36:3(18:0/18:3)[M+Na]+	MGDG 36:3(18:0/18:3)	[M+Na]+	5.72395	803.565	803.565	-0.0003331	13	N
MGDG 36:3(18:1/18:2)[M+Na]+	MGDG 36:3(18:1/18:2)	[M+Na]+	5.55201	803.565	803.565	0.0005773	13	Y
MGDG 36:3(18:1/18:2)[M+NH4]+	MGDG 36:3(18:1/18:2)	[M+NH4]+	5.54198	798.61	798.609	0.0005407	13	Y
MGDG 36:3(18:1/18:2)[M-H+HCO2H]-	MGDG 36:3(18:1/18:2)	[M-H+HCO2H]-	5.7455	825.572	825.573	-0.0012501	13	Y
MGDG 36:4(18:2/18:2)[M+Na]+	MGDG 36:4(18:2/18:2)	[M+Na]+	5.05627	801.552	801.549	0.00262585	13	Y
MGDG 36:4(18:2/18:2)[M+NH4]+	MGDG 36:4(18:2/18:2)	[M+NH4]+	5.03129	796.596	796.594	0.00180855	13	Y
MGDG 36:4(18:2/18:2)[M-H]-	MGDG 36:4(18:2/18:2)	[M-H]-	5.3358	777.552	777.552	0.0008414	13	N
MGDG 36:4(18:2/18:2)[M-H+HCO2H]-	MGDG 36:4(18:2/18:2)	[M-H+HCO2H]-	5.21995	823.558	823.557	0.0006535	13	Y
MGDG 36:5(18:1/18:4)[M+Na]+	MGDG 36:5(18:1/18:4)	[M+Na]+	4.81202	799.536	799.534	0.002238	13	N
MGDG 36:5(18:1/18:4)[M+NH4]+	MGDG 36:5(18:1/18:4)	[M+NH4]+	4.80382	794.58	794.578	0.002232	13	N
MGDG 36:5(18:2/18:3)[M+Na]+	MGDG 36:5(18:2/18:3)	[M+Na]+	4.65238	799.536	799.534	0.002238	13	Y
MGDG 36:5(18:2/18:3)[M+NH4]+	MGDG 36:5(18:2/18:3)	[M+NH4]+	4.64009	794.58	794.578	0.0021201	13	Y
MGDG 36:5(18:2/18:3)[M-H]-	MGDG 36:5(18:2/18:3)	[M-H]-	4.84974	775.534	775.536	-0.0020335	13	Y
MGDG 36:5(18:2/18:3)[M-H+HCO2H]-	MGDG 36:5(18:2/18:3)	[M-H+HCO2H]-	4.81195	821.542	821.541	0.0005604	13	Y
MGDG 36:6(18:3/18:3)[M+Na]+	MGDG 36:6(18:3/18:3)	[M+Na]+	4.26773	797.52	797.518	0.00172815	13	Y
MGDG 36:6(18:3/18:3)[M+NH4]+	MGDG 36:6(18:3/18:3)	[M+NH4]+	4.30205	792.563	792.563	0.0003103	13	Y
MGDG 36:6(18:3/18:3)[M-H]-	MGDG 36:6(18:3/18:3)	[M-H]-	4.46103	773.521	773.52	0.00095085	13	Y
MGDG 36:6(18:3/18:3)[M-H+HCO2H]-	MGDG 36:6(18:3/18:3)	[M-H+HCO2H]-	4.42383	819.528	819.526	0.00178275	13	Y
PC 32:0[M+H]+	PC 32:0	[M+H]+	5.4311	734.568	734.57	-0.0021399	N	Y
PC 32:1[M+H]+	PC 32:1	[M+H]+	4.85458	732.557	732.554	0.0023101	4	Y
PC 32:2[M+H]+	PC 32:2	[M+H]+	4.41463	730.539	730.539	0.00064135	4	Y
PC 32:3[M+H]+	PC 32:3	[M+H]+	4.04707	728.523	728.523	-0.00010165	4	Y
PC 32:4[M+H]+	PC 32:4	[M+H]+	3.74128	726.505	726.507	-0.0025282	N	Y
PC 33:1[M+H]+	PC 33:1	[M+H]+	5.19829	746.567	746.57	-0.003111	4	Y
PC 33:2[M+H]+	PC 33:2	[M+H]+	4.70573	744.554	744.554	-4.735e-05	4	Y
PC 33:3[M+H]+	PC 33:3	[M+H]+	4.34318	742.539	742.539	0.0003189	4	Y
PC 34:1[M+H]+	PC 34:1	[M+H]+	5.49915	760.588	760.586	0.0020465	4	Y
PC 34:1[M+Na]+	PC 34:1	[M+Na]+	5.50035	782.57	782.568	0.0025896	4	N
PC 34:2[M+H]+	PC 34:2	[M+H]+	5.00533	758.572	758.57	0.00173215	4	Y
PC 34:2[M+Na]+	PC 34:2	[M+Na]+	5.00261	780.556	780.552	0.00399905	4	Y
PC 34:3[M+H]+	PC 34:3	[M+H]+	4.64064	756.556	756.554	0.00152885	4	Y
PC 34:3[M+Na]+	PC 34:3	[M+Na]+	4.5981	778.538	778.536	0.0020572	4	N
PC 34:4[M+H]+	PC 34:4	[M+H]+	4.11705	754.539	754.539	0.0001226	4	Y
PC 34:5[M+H]+	PC 34:5	[M+H]+	3.82207	752.525	752.523	0.0015514	4	Y
PC 34:6[M+H]+	PC 34:6	[M+H]+	3.55531	750.509	750.507	0.0012865	4	Y
PC 35:1[M+H]+	PC 35:1	[M+H]+	5.83043	774.605	774.601	0.0037915	4	N
PC 35:2[M+H]+	PC 35:2	[M+H]+	5.28335	772.589	772.586	0.0035418	4	N
PC 35:3[M+H]+	PC 35:3	[M+H]+	4.79333	770.57	770.57	-0.0004051	4	Y
PC 35:4[M+H]+	PC 35:4	[M+H]+	4.40405	768.557	768.554	0.0023406	4	N
PC 36:1[M+H]+	PC 36:1	[M+H]+	6.17592	788.618	788.617	0.00120815	4	Y
PC 36:2[M+H]+	PC 36:2	[M+H]+	5.62994	786.604	786.601	0.00299045	4	Y
PC 36:3[M+H]+	PC 36:3	[M+H]+	5.11618	784.588	784.586	0.00204645	4	Y
PC 36:3[M+Na]+	PC 36:3	[M+Na]+	5.09485	806.564	806.568	-0.0040124	4	N
PC 36:4[M+H]+	PC 36:4	[M+H]+	4.63863	782.572	782.57	0.0017002	4	Y
PC 36:4[M+Na]+	PC 36:4	[M+Na]+	4.60357	804.55	804.552	-0.0016986	4	N
PC 36:5[M+H]+	PC 36:5	[M+H]+	4.30055	780.556	780.554	0.00159905	4	Y
PC 36:5[M+Na]+	PC 36:5	[M+Na]+	4.25425	802.534	802.536	-0.0018262	4	N
PC 36:6[M+H]+	PC 36:6	[M+H]+	3.90128	778.54	778.539	0.0012174	4	Y
PC 36:6[M+Na]+	PC 36:6	[M+Na]+	3.92797	800.525	800.521	0.0046075	4	N
PC 37:3[M+H]+	PC 37:3	[M+H]+	5.43657	798.6	798.601	-0.0012686	N	Y
PC 38:2[M+H]+	PC 38:2	[M+H]+	6.30685	814.634	814.633	0.0016968	4	Y
PC 38:3[M+H]+	PC 38:3	[M+H]+	5.69602	812.618	812.617	0.00087835	4	Y
PC 38:4[M+H]+	PC 38:4	[M+H]+	5.15994	810.601	810.601	-0.00035595	4	Y
PC 38:5[M+H]+	PC 38:5	[M+H]+	4.78862	808.585	808.586	-0.00047285	4	Y
PC 41:2[M+H]+	PC 41:2	[M+H]+	7.29022	856.682	856.68	0.0016711	N	Y
PC 41:3[M+H]+	PC 41:3	[M+H]+	6.86638	854.666	854.664	0.0015273	N	Y
PC 42:2[M+H]+	PC 42:2	[M+H]+	7.5908	870.693	870.695	-0.0020679	N	Y
PC 43:3[M+H]+	PC 43:3	[M+H]+	7.49157	882.698	882.695	0.0025098	N	Y
PE 34:1(16:0/18:1)[M+H]+	PE 34:1(16:0/18:1)	[M+H]+	5.68428	718.54	718.539	0.0009606	N	Y
PE 34:1(16:0/18:1)[M-H]-	PE 34:1(16:0/18:1)	[M-H]-	5.88692	716.524	716.523	0.0005889	9	Y
PE 34:2(16:0/18:2)[M+H]+	PE 34:2(16:0/18:2)	[M+H]+	5.14352	716.525	716.523	0.0020529	9	Y
PE 34:2(16:0/18:2)[M-H]-	PE 34:2(16:0/18:2)	[M-H]-	5.42723	714.507	714.507	-1.255e-05	9	Y
PE 34:3(16:0/18:3)[M+H]+	PE 34:3(16:0/18:3)	[M+H]+	4.74557	714.509	714.507	0.0013956	N	Y
PE 34:3(16:0/18:3)[M-H]-	PE 34:3(16:0/18:3)	[M-H]-	4.93727	712.491	712.492	-0.00050715	9	Y
PE 34:3(16:1/18:2)[M+H]+	PE 34:3(16:1/18:2)	[M+H]+	4.75235	714.508	714.507	0.0008172	9	N
PE 36:3(18:1/18:2)[M+H]+	PE 36:3(18:1/18:2)	[M+H]+	5.23967	742.539	742.539	8.58e-05	N	Y
PE 36:3(18:1/18:2)[M-H]-	PE 36:3(18:1/18:2)	[M-H]-	5.47325	740.52	740.523	-0.0029817	9	Y
PE 36:4(18:2/18:2)[M+H]+	PE 36:4(18:2/18:2)	[M+H]+	4.75027	740.525	740.523	0.0021521	9	Y
PE 36:4(18:2/18:2)[M-H]-	PE 36:4(18:2/18:2)	[M-H]-	5.00554	738.507	738.507	0.0004463	9	Y
PE 36:5(18:2/18:3)[M+H]+	PE 36:5(18:2/18:3)	[M+H]+	4.37781	738.51	738.507	0.0025756	9	Y
PE 36:5(18:2/18:3)[M-H]-	PE 36:5(18:2/18:3)	[M-H]-	4.5644	736.493	736.492	0.00103405	9	Y
PE 36:6[M+H]+	PE 36:6	[M+H]+	4.0255	736.491	736.492	-0.0003096	N	Y
PG 30:0(14:0/16:0)[M-H]-	PG 30:0(14:0/16:0)	[M-H]-	4.50405	693.469	693.471	-0.0013407	N	Y
PG 32:0(14:0/16:0)[M-H]-	PG 32:0(14:0/16:0)	[M-H]-	4.68502	693.471	693.471	0.0005514	6	N
PG 32:0(16:0/16:0)[M-H]-	PG 32:0(16:0/16:0)	[M-H]-	5.26392	721.502	721.502	0.00012395	6	Y
PG 32:1(16:0/16:1)[M-H]-	PG 32:1(16:0/16:1)	[M-H]-	4.80869	719.486	719.486	2.26e-05	6	Y
PG 32:2(14:0/18:2)[M-H]-	PG 32:2(14:0/18:2)	[M-H]-	4.2184	717.47	717.471	-0.0008825	N	Y
PG 32:3(14:0/18:3)[M-H]-	PG 32:3(14:0/18:3)	[M-H]-	3.87028	715.454	715.455	-0.001194	N	Y
PG 32:4(14:1/18:3)[M-H]-	PG 32:4(14:1/18:3)	[M-H]-	3.69215	713.438	713.439	-0.0017802	N	Y
PG 34:0(16:0/18:0)[M-H]-	PG 34:0(16:0/18:0)	[M-H]-	5.93138	749.531	749.533	-0.0018597	6	N
PG 34:1(16:0/18:1)[M+Na]+	PG 34:1(16:0/18:1)	[M+Na]+	5.091	771.518	771.515	0.002462	6	N
PG 34:1(16:0/18:1)[M-H]-	PG 34:1(16:0/18:1)	[M-H]-	5.21441	747.517	747.518	-0.00073685	6	Y
PG 34:2(16:0/18:2)[M+H]+	PG 34:2(16:0/18:2)	[M+H]+	4.59034	747.518	747.518	5.66e-05	6	Y
PG 34:2(16:0/18:2)[M+Na]+	PG 34:2(16:0/18:2)	[M+Na]+	4.6001	769.5	769.5	-1.63e-05	6	N
PG 34:2(16:0/18:2)[M+NH4]+	PG 34:2(16:0/18:2)	[M+NH4]+	4.59158	764.544	764.544	0.0001201	6	N
PG 34:2(16:0/18:2)[M-H]-	PG 34:2(16:0/18:2)	[M-H]-	4.81449	745.503	745.502	0.00057715	6	Y
PG 34:2(16:1/18:1)[M-H]-	PG 34:2(16:1/18:1)	[M-H]-	4.92587	745.502	745.502	-0.0001227	N	Y
PG 34:3(16:0/18:3)[M+H]+	PG 34:3(16:0/18:3)	[M+H]+	4.4693	745.5	745.502	-0.0019334	6	N
PG 34:3(16:0/18:3)[M-H]-	PG 34:3(16:0/18:3)	[M-H]-	4.4279	743.487	743.486	0.0002311	6	Y
PG 34:3(16:1/18:2)[M+H]+	PG 34:3(16:1/18:2)	[M+H]+	4.37908	745.502	745.502	-0.00028545	6	Y
PG 34:3(16:1/18:2)[M+Na]+	PG 34:3(16:1/18:2)	[M+Na]+	4.38865	767.483	767.484	-0.0009076	6	N
PG 34:3(16:1/18:2)[M+NH4]+	PG 34:3(16:1/18:2)	[M+NH4]+	4.38273	762.528	762.528	-0.00047505	6	Y
PG 34:3(16:1/18:2)[M-H]-	PG 34:3(16:1/18:2)	[M-H]-	4.59106	743.487	743.486	0.0002311	6	Y
PG 34:3(16:2/18:1)[M+NH4]+	PG 34:3(16:2/18:1)	[M+NH4]+	4.47658	762.527	762.528	-0.0016664	6	N
PG 34:4(16:0/18:4)[M+H]+	PG 34:4(16:0/18:4)	[M+H]+	3.83918	743.487	743.486	0.0003186	6	N
PG 34:4(16:1/18:3)[M+H]+	PG 34:4(16:1/18:3)	[M+H]+	4.08781	743.488	743.486	0.00170715	6	Y
PG 34:4(16:1/18:3)[M+Na]+	PG 34:4(16:1/18:3)	[M+Na]+	4.0723	765.468	765.468	-0.0002731	6	N
PG 34:4(16:1/18:3)[M+NH4]+	PG 34:4(16:1/18:3)	[M+NH4]+	4.05502	760.514	760.513	0.0009835	6	Y
PG 34:4(16:1/18:3)[M-H]-	PG 34:4(16:1/18:3)	[M-H]-	4.24735	741.471	741.471	-7.43e-05	6	Y
PG 34:5(16:1/18:4)[M+H]+	PG 34:5(16:1/18:4)	[M+H]+	3.41485	741.473	741.471	0.0022196	6	N
PG 34:6(16:2/18:4)[M+H]+	PG 34:6(16:2/18:4)	[M+H]+	3.25165	739.458	739.455	0.003022	6	N
PG 36:3(18:1/18:2)[M-H]-	PG 36:3(18:1/18:2)	[M-H]-	4.9838	771.526	771.518	0.008719	N	Y
PG 36:4(18:1/18:3)[M-H]-	PG 36:4(18:1/18:3)	[M-H]-	4.58943	769.51	769.502	0.0075843	N	Y
PG 36:5(16:3/20:2)[M-H]-	PG 36:5(16:3/20:2)	[M-H]-	4.21958	767.493	767.486	0.0065107	N	Y
PG 36:6(18:3/18:3)[M-H]-	PG 36:6(18:3/18:3)	[M-H]-	3.92303	765.472	765.471	0.0016528	N	Y
PI 34:1(16:0/18:1)[M-H]-	PI 34:1(16:0/18:1)	[M-H]-	5.07375	835.535	835.534	0.00155695	3	Y
PI 34:2(16:0/18:2)[M-H]-	PI 34:2(16:0/18:2)	[M-H]-	4.64963	833.519	833.518	0.0005952	3	Y
PI 34:3(16:0/18:3)[M-H]-	PI 34:3(16:0/18:3)	[M-H]-	4.17872	831.501	831.502	-0.0014753	N	Y
SQDG 32:0(16:0/16:0)[M+Na]+	SQDG 32:0(16:0/16:0)	[M+Na]+	4.72315	817.516	817.511	0.0047495	7	N
SQDG 32:0(16:0/16:0)[M+NH4]+	SQDG 32:0(16:0/16:0)	[M+NH4]+	4.69148	812.558	812.556	0.00231965	7	Y
SQDG 32:0(16:0/16:0)[M-H]-	SQDG 32:0(16:0/16:0)	[M-H]-	4.86821	793.513	793.514	-0.000873	7	Y
SQDG 32:1[M+NH4]+	SQDG 32:1	[M+NH4]+	4.27992	810.542	810.54	0.0022684	7	N
SQDG 32:1[M-H]-	SQDG 32:1	[M-H]-	4.43614	791.496	791.498	-0.00166385	7	Y
SQDG 32:2(14:0/18:2)[M+NH4]+	SQDG 32:2(14:0/18:2)	[M+NH4]+	3.91037	808.525	808.524	6.56e-05	7	Y
SQDG 32:2(14:0/18:2)[M-H]-	SQDG 32:2(14:0/18:2)	[M-H]-	4.09281	789.48	789.482	-0.00177615	7	Y
SQDG 32:3(14:0/18:3)[M+NH4]+	SQDG 32:3(14:0/18:3)	[M+NH4]+	3.65465	806.506	806.509	-0.0026254	N	Y
SQDG 32:3(14:0/18:3)[M-H]-	SQDG 32:3(14:0/18:3)	[M-H]-	3.76956	787.464	787.467	-0.00230555	7	Y
SQDG 34:0[M-H]-	SQDG 34:0	[M-H]-	5.59443	821.544	821.545	-0.0004978	7	N
SQDG 34:1(16:0/18:1)[M-H]-	SQDG 34:1(16:0/18:1)	[M-H]-	4.9213	819.528	819.529	-0.0007881	N	Y
SQDG 34:1[M+Na]+	SQDG 34:1	[M+Na]+	4.81155	843.526	843.527	-0.0004228	7	N
SQDG 34:1[M+NH4]+	SQDG 34:1	[M+NH4]+	4.76823	838.574	838.571	0.0027982	7	Y
SQDG 34:1[M-H]-	SQDG 34:1	[M-H]-	5.05083	819.527	819.529	-0.0019478	7	N
SQDG 34:2(16:0/18:2)[M+Na]+	SQDG 34:2(16:0/18:2)	[M+Na]+	4.37173	841.515	841.511	0.0034474	7	N
SQDG 34:2(16:0/18:2)[M+NH4]+	SQDG 34:2(16:0/18:2)	[M+NH4]+	4.35187	836.558	836.556	0.00203995	7	Y
SQDG 34:2(16:0/18:2)[M-H]-	SQDG 34:2(16:0/18:2)	[M-H]-	4.52328	817.514	817.514	0.0006521	7	Y
SQDG 34:3(16:0/18:3)[M+Na]+	SQDG 34:3(16:0/18:3)	[M+Na]+	4.04903	839.497	839.495	0.0013972	7	N
SQDG 34:3(16:0/18:3)[M+NH4]+	SQDG 34:3(16:0/18:3)	[M+NH4]+	4.14638	834.542	834.54	0.00147625	7	Y
SQDG 34:3(16:0/18:3)[M-H]-	SQDG 34:3(16:0/18:3)	[M-H]-	4.28014	815.499	815.498	0.00107305	7	Y
SQDG 34:4(16:1/18:3)[M+NH4]+	SQDG 34:4(16:1/18:3)	[M+NH4]+	3.69297	832.525	832.524	0.00049285	7	Y
SQDG 34:4(16:1/18:3)[M-H]-	SQDG 34:4(16:1/18:3)	[M-H]-	3.87637	813.483	813.482	0.001179	7	N
SQDG 34:4(16:2/18:2)[M-H]-	SQDG 34:4(16:2/18:2)	[M-H]-	3.759	813.482	813.482	-0.0001028	N	Y
SQDG 34:5(16:2/18:3)[M-H]-	SQDG 34:5(16:2/18:3)	[M-H]-	3.50062	811.469	811.467	0.0026993	N	Y
SQDG 36:1[M-H]-	SQDG 36:1	[M-H]-	5.68647	847.557	847.561	-0.0030659	7	N
SQDG 36:2(18:0/18:2)[M+NH4]+	SQDG 36:2(18:0/18:2)	[M+NH4]+	4.96873	864.589	864.587	0.0018882	N	Y
SQDG 36:2(18:0/18:2)[M-H]-	SQDG 36:2(18:0/18:2)	[M-H]-	5.10782	845.545	845.545	0.0004686	7	Y
SQDG 36:3[M+NH4]+	SQDG 36:3	[M+NH4]+	4.44386	862.572	862.571	0.00057045	7	Y
SQDG 36:3[M-H]-	SQDG 36:3	[M-H]-	4.62385	843.528	843.529	-0.0013527	7	Y
SQDG 36:4(18:2/18:2)[M+NH4]+	SQDG 36:4(18:2/18:2)	[M+NH4]+	4.09996	860.557	860.556	0.0007786	7	Y
SQDG 36:4(18:2/18:2)[M-H]-	SQDG 36:4(18:2/18:2)	[M-H]-	4.22964	841.514	841.514	1.51e-05	7	Y
SQDG 36:5(18:2/18:3)[M+Na]+	SQDG 36:5(18:2/18:3)	[M+Na]+	3.7798	863.499	863.495	0.0031062	7	N
SQDG 36:5(18:2/18:3)[M+NH4]+	SQDG 36:5(18:2/18:3)	[M+NH4]+	3.79497	860.192	860.192	0.000396167	7	Y
SQDG 36:5(18:2/18:3)[M-H]-	SQDG 36:5(18:2/18:3)	[M-H]-	3.93187	839.499	839.498	0.00151	7	Y
SQDG 36:6(18:3/18:3)[M+NH4]+	SQDG 36:6(18:3/18:3)	[M+NH4]+	3.59005	856.526	856.524	0.0018051	N	Y
SQDG 36:6(18:3/18:3)[M-H]-	SQDG 36:6(18:3/18:3)	[M-H]-	3.63468	837.482	837.482	0.0001668	7	Y
TG 40:0(12:0/12:0/16:0)[M+NH4]+	TG 40:0(12:0/12:0/16:0)	[M+NH4]+	8.93453	712.643	712.645	-0.0022	N	Y
TG 42:0(12:0/12:0/18:0)[M+NH4]+	TG 42:0(12:0/12:0/18:0)	[M+NH4]+	9.53397	740.676	740.676	0.0002	N	Y
TG 42:0(12:0/14:0/16:0)[M+NH4]+	TG 42:0(12:0/14:0/16:0)	[M+NH4]+	9.44568	740.676	740.676	0.0002	N	Y
TG 46:0(14:0/16:0/16:0)[M+NH4]+	TG 46:0(14:0/16:0/16:0)	[M+NH4]+	10.4077	796.74	796.739	0.000575	19&20	Y
TG 46:1(14:0/16:0/16:1)[M+NH4]+	TG 46:1(14:0/16:0/16:1)	[M+NH4]+	9.96304	794.725	794.723	0.00155	19&20	Y
TG 46:3(14:1/16:1/16:1)[M+NH4]+	TG 46:3(14:1/16:1/16:1)	[M+NH4]+	9.13037	790.69	790.692	-0.0022	N	Y
TG 48:0(14:0/16:0/18:0)[M+NH4]+	TG 48:0(14:0/16:0/18:0)	[M+NH4]+	10.8245	824.771	824.77	0.0012	19	Y
TG 48:1(14:0/16:0/18:1)[M+NH4]+	TG 48:1(14:0/16:0/18:1)	[M+NH4]+	10.4058	822.756	822.755	0.000935714	19&20	Y
TG 48:2(14:0/16:1/18:1)[M+NH4]+	TG 48:2(14:0/16:1/18:1)	[M+NH4]+	9.99099	820.741	820.739	0.00215	19	Y
TG 48:2(16:0/16:1/16:1)[M+NH4]+	TG 48:2(16:0/16:1/16:1)	[M+NH4]+	10.0119	820.74	820.739	0.0015	N	Y
TG 48:3(14:1/16:1/18:1)[M+NH4]+	TG 48:3(14:1/16:1/18:1)	[M+NH4]+	9.56818	818.724	818.723	0.0009	N	Y
TG 49:0(16:0/16:0/17:0)[M+NH4]+	TG 49:0(16:0/16:0/17:0)	[M+NH4]+	10.9959	838.787	838.786	0.00065	20	Y
TG 49:1(16:0/16:1/17:0)[M+NH4]+	TG 49:1(16:0/16:1/17:0)	[M+NH4]+	10.6351	836.77	836.77	0.0005	N	Y
TG 49:2(16:0/16:1/17:1)[M+NH4]+	TG 49:2(16:0/16:1/17:1)	[M+NH4]+	10.2383	834.756	834.755	0.0007	N	Y
TG 49:3(16:0/16:1/17:2)[M+NH4]+	TG 49:3(16:0/16:1/17:2)	[M+NH4]+	9.89658	832.736	832.739	-0.0032	N	Y
TG 50:0(16:0/16:0/18:0)[M+NH4]+	TG 50:0(16:0/16:0/18:0)	[M+NH4]+	11.2049	852.804	852.802	0.0021	20	Y
TG 50:0(16:0/17:0/17:0)[M+NH4]+	TG 50:0(16:0/17:0/17:0)	[M+NH4]+	11.2852	852.803	852.802	0.0016	20	N
TG 50:1(16:0/16:0/18:1)[M+NH4]+	TG 50:1(16:0/16:0/18:1)	[M+NH4]+	10.8496	850.789	850.786	0.00300714	19&20	Y
TG 50:2(16:0/16:0/18:2)[M+NH4]+	TG 50:2(16:0/16:0/18:2)	[M+NH4]+	10.5027	848.774	848.77	0.0037	20	Y
TG 50:2(16:0/16:1/18:1)[M+NH4]+	TG 50:2(16:0/16:1/18:1)	[M+NH4]+	10.4525	848.773	848.77	0.00240833	19&20	Y
TG 50:3(16:0/16:0/18:3)[M+NH4]+	TG 50:3(16:0/16:0/18:3)	[M+NH4]+	10.1504	846.758	846.755	0.0027	N	Y
TG 50:3(16:0/16:1/18:2)[M+NH4]+	TG 50:3(16:0/16:1/18:2)	[M+NH4]+	10.0605	846.757	846.755	0.00185	19	Y
TG 50:3(16:1/16:1/18:1)[M+NH4]+	TG 50:3(16:1/16:1/18:1)	[M+NH4]+	10.0437	846.755	846.755	0.0004	20	N
TG 50:4(16:0/16:1/18:3)[M+NH4]+	TG 50:4(16:0/16:1/18:3)	[M+NH4]+	9.74657	844.739	844.739	0.0004	N	Y
TG 50:4(16:1/16:1/18:2)[M+NH4]+	TG 50:4(16:1/16:1/18:2)	[M+NH4]+	9.66072	844.739	844.739	0.0004	N	Y
TG 50:5(16:1/16:1/18:3)[M+NH4]+	TG 50:5(16:1/16:1/18:3)	[M+NH4]+	9.25303	842.724	842.723	0.0011	N	Y
TG 51:0(16:0/17:0/18:0)[M+NH4]+	TG 51:0(16:0/17:0/18:0)	[M+NH4]+	11.3993	866.818	866.817	0.00045	20	Y
TG 51:1(16:0/17:0/18:1)[M+NH4]+	TG 51:1(16:0/17:0/18:1)	[M+NH4]+	11.0221	864.803	864.802	0.00156667	19&20	Y
TG 51:2(16:0/17:0/18:2)[M+NH4]+	TG 51:2(16:0/17:0/18:2)	[M+NH4]+	10.6814	862.789	862.786	0.0028	N	Y
TG 51:2(16:0/17:1/18:1)[M+NH4]+	TG 51:2(16:0/17:1/18:1)	[M+NH4]+	10.647	862.788	862.786	0.0017	19	Y
TG 51:3(16:0/17:0/18:3)[M+NH4]+	TG 51:3(16:0/17:0/18:3)	[M+NH4]+	10.3835	860.772	860.77	0.0024	N	Y
TG 51:3(16:0/17:2/18:1)[M+NH4]+	TG 51:3(16:0/17:2/18:1)	[M+NH4]+	10.2782	860.772	860.77	0.0024	N	Y
TG 51:3(16:1/17:0/18:2)[M+NH4]+	TG 51:3(16:1/17:0/18:2)	[M+NH4]+	10.2792	860.772	860.77	0.0024	N	Y
TG 51:4(16:0/17:2/18:2)[M+NH4]+	TG 51:4(16:0/17:2/18:2)	[M+NH4]+	9.89008	858.753	858.755	-0.0019	N	Y
TG 52:0(16:0/18:0/18:0)[M+NH4]+	TG 52:0(16:0/18:0/18:0)	[M+NH4]+	11.5813	880.832	880.833	-0.000575	19&20	Y
TG 52:1(16:0/18:0/18:1)[M+NH4]+	TG 52:1(16:0/18:0/18:1)	[M+NH4]+	11.2287	878.819	878.817	0.00225	20	Y
TG 52:2(16:0/18:0/18:2)[M+NH4]+	TG 52:2(16:0/18:0/18:2)	[M+NH4]+	10.9394	876.806	876.802	0.0046	19	N
TG 52:2(16:0/18:1/18:1)[M+NH4]+	TG 52:2(16:0/18:1/18:1)	[M+NH4]+	10.8814	876.805	876.802	0.00303636	19&20	Y
TG 52:3(16:0/18:0/18:3)[M+NH4]+	TG 52:3(16:0/18:0/18:3)	[M+NH4]+	10.6301	874.79	874.786	0.0036	N	Y
TG 52:3(16:0/18:1/18:2)[M+Na]+	TG 52:3(16:0/18:1/18:2)	[M+Na]+	10.5135	879.744	879.741	0.0024	19	N
TG 52:3(16:0/18:1/18:2)[M+NH4]+	TG 52:3(16:0/18:1/18:2)	[M+NH4]+	10.4828	874.789	874.786	0.00320714	19&20	Y
TG 52:3(16:1/18:1/18:1)[M+NH4]+	TG 52:3(16:1/18:1/18:1)	[M+NH4]+	10.4243	874.788	874.786	0.0019	19	N
TG 52:4(16:0/18:1/18:3)[M+NH4]+	TG 52:4(16:0/18:1/18:3)	[M+NH4]+	10.2007	872.772	872.77	0.0023	20	Y
TG 52:4(16:0/18:2/18:2)[M+NH4]+	TG 52:4(16:0/18:2/18:2)	[M+NH4]+	10.1418	872.773	872.77	0.0028	19	Y
TG 52:4(16:1/18:1/18:2)[M+NH4]+	TG 52:4(16:1/18:1/18:2)	[M+NH4]+	10.066	872.773	872.77	0.00266667	19&20	N
TG 52:5(16:0/18:2/18:3)[M+Na]+	TG 52:5(16:0/18:2/18:3)	[M+Na]+	9.72417	875.71	875.71	0	N	Y
TG 52:5(16:0/18:2/18:3)[M+NH4]+	TG 52:5(16:0/18:2/18:3)	[M+NH4]+	9.77595	870.756	870.755	0.00085	20	Y
TG 52:5(16:1/18:2/18:2)[M+NH4]+	TG 52:5(16:1/18:2/18:2)	[M+NH4]+	9.66072	870.755	870.755	0.0002	N	Y
TG 52:6(16:0/16:1/20:5)[M+NH4]+	TG 52:6(16:0/16:1/20:5)	[M+NH4]+	9.54767	868.739	868.739	0	N	Y
TG 52:6(16:0/18:3/18:3)[M+NH4]+	TG 52:6(16:0/18:3/18:3)	[M+NH4]+	9.38929	868.739	868.739	0	N	Y
TG 52:6(16:1/18:2/18:3)[M+NH4]+	TG 52:6(16:1/18:2/18:3)	[M+NH4]+	9.33379	868.739	868.739	0	N	Y
TG 53:1(17:0/18:0/18:1)[M+NH4]+	TG 53:1(17:0/18:0/18:1)	[M+NH4]+	11.4052	892.835	892.833	0.00226	19&20	N
TG 53:2(17:0/18:1/18:1)[M+NH4]+	TG 53:2(17:0/18:1/18:1)	[M+NH4]+	11.0384	890.818	890.817	0.0012	19	Y
TG 53:3(17:0/18:1/18:2)[M+NH4]+	TG 53:3(17:0/18:1/18:2)	[M+NH4]+	10.7033	888.802	888.802	0.00015	19	Y
TG 53:3(17:1/18:1/18:1)[M+NH4]+	TG 53:3(17:1/18:1/18:1)	[M+NH4]+	10.6383	888.803	888.802	0.0015	19	N
TG 53:4(17:0/18:2/18:2)[M+NH4]+	TG 53:4(17:0/18:2/18:2)	[M+NH4]+	10.332	886.785	886.786	-0.0011	N	Y
TG 53:5(17:0/18:2/18:3)[M+NH4]+	TG 53:5(17:0/18:2/18:3)	[M+NH4]+	9.9904	884.771	884.77	0.001	N	Y
TG 54:0(16:0/18:0/20:0)[M+NH4]+	TG 54:0(16:0/18:0/20:0)	[M+NH4]+	11.8576	908.865	908.864	0.001375	19&20	Y
TG 54:1(16:0/18:0/20:1)[M+NH4]+	TG 54:1(16:0/18:0/20:1)	[M+NH4]+	11.5645	906.848	906.848	-0.0002	20	N
TG 54:1(16:0/18:1/20:0)[M+NH4]+	TG 54:1(16:0/18:1/20:0)	[M+NH4]+	11.5866	906.85	906.848	0.0019	N	Y
TG 54:1(18:0/18:0/18:1)[M+NH4]+	TG 54:1(18:0/18:0/18:1)	[M+NH4]+	11.5776	906.85	906.848	0.00205	19&20	Y
TG 54:2(18:0/18:1/18:1)[M+NH4]+	TG 54:2(18:0/18:1/18:1)	[M+NH4]+	11.2502	904.836	904.833	0.0035	20	Y
TG 54:3(18:0/18:1/18:2)[M+NH4]+	TG 54:3(18:0/18:1/18:2)	[M+NH4]+	10.923	902.82	902.817	0.00275	19&20	Y
TG 54:3(18:1/18:1/18:1)[M+NH4]+	TG 54:3(18:1/18:1/18:1)	[M+NH4]+	10.8141	902.819	902.817	0.0022	N	Y
TG 54:4(16:0/18:1/20:3)[M+NH4]+	TG 54:4(16:0/18:1/20:3)	[M+NH4]+	10.6275	900.804	900.802	0.0024	19	N
TG 54:4(18:0/18:1/18:3)[M+NH4]+	TG 54:4(18:0/18:1/18:3)	[M+NH4]+	10.6192	900.805	900.802	0.0028	N	Y
TG 54:4(18:1/18:1/18:2)[M+NH4]+	TG 54:4(18:1/18:1/18:2)	[M+NH4]+	10.5066	900.804	900.802	0.00213333	19&20	Y
TG 54:5(18:0/18:2/18:3)[M+NH4]+	TG 54:5(18:0/18:2/18:3)	[M+NH4]+	10.27	898.79	898.786	0.0036	N	Y
TG 54:5(18:1/18:1/18:3)[M+NH4]+	TG 54:5(18:1/18:1/18:3)	[M+NH4]+	10.1945	898.788	898.786	0.00216667	19&20	N
TG 54:5(18:1/18:2/18:2)[M+NH4]+	TG 54:5(18:1/18:2/18:2)	[M+NH4]+	10.1443	898.789	898.786	0.00256667	19&20	Y
TG 54:6(18:0/18:3/18:3)[M+NH4]+	TG 54:6(18:0/18:3/18:3)	[M+NH4]+	9.87862	896.77	896.77	0.0004	N	Y
TG 54:6(18:1/18:2/18:3)[M+Na]+	TG 54:6(18:1/18:2/18:3)	[M+Na]+	9.74703	901.726	901.726	0	N	Y
TG 54:6(18:1/18:2/18:3)[M+NH4]+	TG 54:6(18:1/18:2/18:3)	[M+NH4]+	9.77176	896.77	896.77	0.000225	19&20	Y
TG 54:6(18:2/18:2/18:2)[M+NH4]+	TG 54:6(18:2/18:2/18:2)	[M+NH4]+	9.71433	896.77	896.77	0.0004	N	Y
TG 54:7(18:2/18:2/18:3)[M+NH4]+	TG 54:7(18:2/18:2/18:3)	[M+NH4]+	9.40202	894.755	894.755	-0.0003	N	Y
TG 54:8(18:2/18:3/18:3)[M+NH4]+	TG 54:8(18:2/18:3/18:3)	[M+NH4]+	9.00625	892.74	892.739	0.0013	N	Y
TG 54:9(18:3/18:3/18:3)[M+NH4]+	TG 54:9(18:3/18:3/18:3)	[M+NH4]+	8.57227	890.725	890.723	0.0019	N	Y
TG 56:0(16:0/20:0/20:0)[M+NH4]+	TG 56:0(16:0/20:0/20:0)	[M+NH4]+	11.9892	936.899	936.895	0.004	20	N
TG 56:2(18:0/18:1/20:1)[M+NH4]+	TG 56:2(18:0/18:1/20:1)	[M+NH4]+	11.5858	932.86	932.864	-0.0037	19	N
TG 56:2(18:1/18:1/20:0)[M+NH4]+	TG 56:2(18:1/18:1/20:0)	[M+NH4]+	11.5968	932.866	932.864	0.00175	19&20	Y
TG 56:3(18:0/18:2/20:1)[M+NH4]+	TG 56:3(18:0/18:2/20:1)	[M+NH4]+	11.3258	930.852	930.848	0.0034	20	N
TG 56:3(18:1/18:1/20:1)[M+NH4]+	TG 56:3(18:1/18:1/20:1)	[M+NH4]+	11.2298	930.851	930.848	0.0024	20	Y
TG 56:3(18:1/18:2/20:0)[M+NH4]+	TG 56:3(18:1/18:2/20:0)	[M+NH4]+	11.3119	930.849	930.848	0.0014	N	Y
TG 56:4(18:0/18:1/20:3)[M+NH4]+	TG 56:4(18:0/18:1/20:3)	[M+NH4]+	10.9621	928.832	928.833	-0.0007	20	N
TG 56:4(18:1/18:2/20:1)[M+NH4]+	TG 56:4(18:1/18:2/20:1)	[M+NH4]+	10.9054	928.834	928.833	0.00105	19	Y
TG 56:4(18:2/18:2/20:0)[M+NH4]+	TG 56:4(18:2/18:2/20:0)	[M+NH4]+	10.9922	928.833	928.833	0.0004	N	Y
TG 56:5(18:1/18:3/20:1)[M+NH4]+	TG 56:5(18:1/18:3/20:1)	[M+NH4]+	10.5951	926.819	926.817	0.0022	N	Y
TG 56:5(18:2/18:2/20:1)[M+NH4]+	TG 56:5(18:2/18:2/20:1)	[M+NH4]+	10.5503	926.819	926.817	0.0022	N	Y
TG 56:5(18:2/18:3/20:0)[M+NH4]+	TG 56:5(18:2/18:3/20:0)	[M+NH4]+	10.6379	926.819	926.817	0.0022	N	Y
TG 56:6(18:2/18:3/20:1)[M+NH4]+	TG 56:6(18:2/18:3/20:1)	[M+NH4]+	10.246	924.805	924.802	0.0027	N	Y

## Sheet: Table S3
Table S3. Detailed Information of all lipids annotated in Euglena gracilis (UTEX LB 367)
In TLC fraction and total extract columns, "Y" means found while "N" means not found. Fraction numbers refer to the numbers in Fig. A. 3.
Precursor	Lipid	Adduct	RT (min)	Experimental m/z	Calculated m/z	Error	TLC fraction	Total extract
DG 32:1(14:0/18:1)[M+NH4]+	DG 32:1(14:0/18:1)	[M+NH4]+	5.60433	584.524	584.525	-0.0015	N	Y
DG 34:1(16:0/18:1)[M+NH4]+	DG 34:1(16:0/18:1)	[M+NH4]+	6.24307	612.557	612.556	0.0005	N	Y
DG 34:2(16:0/18:2)[M+NH4]+	DG 34:2(16:0/18:2)	[M+NH4]+	5.76695	610.542	610.541	0.0016	N	Y
DG 34:2(16:1/18:1)[M+NH4]+	DG 34:2(16:1/18:1)	[M+NH4]+	5.68283	610.542	610.541	0.0016	N	Y
DG 34:5(14:0/20:5)[M+NH4]+	DG 34:5(14:0/20:5)	[M+NH4]+	4.57917	604.494	604.494	0.0006	N	Y
DG 36:2(18:1/18:1)[M+NH4]+	DG 36:2(18:1/18:1)	[M+NH4]+	6.30585	638.573	638.572	0.0014	N	Y
DG 36:3(18:1/18:2)[M+NH4]+	DG 36:3(18:1/18:2)	[M+NH4]+	5.80618	636.556	636.556	-0.0009	N	Y
DG 36:4(16:0/20:4)[M+NH4]+	DG 36:4(16:0/20:4)	[M+NH4]+	5.58427	634.541	634.541	-0.0001	N	Y
DG 36:5(14:0/22:5)[M+NH4]+	DG 36:5(14:0/22:5)	[M+NH4]+	5.2039	632.527	632.525	0.002	N	Y
DG 36:5(16:0/20:5)[M+NH4]+	DG 36:5(16:0/20:5)	[M+NH4]+	5.12018	632.527	632.525	0.002	N	Y
DG 36:6(14:0/22:6)[M+NH4]+	DG 36:6(14:0/22:6)	[M+NH4]+	4.7856	630.51	630.509	0.0006	N	Y
DG 38:3(18:1/20:2)[M+NH4]+	DG 38:3(18:1/20:2)	[M+NH4]+	6.34266	664.586	664.588	-0.0014	N	Y
DG 38:4(16:0/22:4)[M+NH4]+	DG 38:4(16:0/22:4)	[M+NH4]+	6.0684	662.572	662.572	0.0001	N	Y
DG 38:4(18:1/20:3)[M+NH4]+	DG 38:4(18:1/20:3)	[M+NH4]+	5.92617	662.572	662.572	0.0001	N	Y
DG 38:5(16:0/22:5)[M+NH4]+	DG 38:5(16:0/22:5)	[M+NH4]+	5.84117	660.556	660.556	-0.0001	N	Y
DG 38:5(18:1/20:4)[M+NH4]+	DG 38:5(18:1/20:4)	[M+NH4]+	5.53642	660.556	660.556	-0.0001	N	Y
DG 38:6(16:0/22:6)[M+NH4]+	DG 38:6(16:0/22:6)	[M+NH4]+	5.37394	658.539	658.541	-0.00135	17	Y
DG 38:6(18:1/20:5)[M+NH4]+	DG 38:6(18:1/20:5)	[M+NH4]+	5.16208	658.542	658.541	0.001	N	Y
DG 40:6(18:1/22:5)[M+NH4]+	DG 40:6(18:1/22:5)	[M+NH4]+	5.83162	686.571	686.572	-0.0011	N	Y
DG 40:6(20:2/20:4)[M+NH4]+	DG 40:6(20:2/20:4)	[M+NH4]+	5.66917	686.571	686.572	-0.0011	N	Y
DG 40:7(18:1/22:6)[M+NH4]+	DG 40:7(18:1/22:6)	[M+NH4]+	5.38075	684.558	684.556	0.0016	N	Y
DG 40:7(20:2/20:5)[M+NH4]+	DG 40:7(20:2/20:5)	[M+NH4]+	5.26485	684.558	684.556	0.0016	N	Y
DG 40:8(20:3/20:5)[M+NH4]+	DG 40:8(20:3/20:5)	[M+NH4]+	4.87197	682.54	682.541	-0.0008	N	Y
DG 40:9(20:4/20:5)[M+NH4]+	DG 40:9(20:4/20:5)	[M+NH4]+	4.58736	680.525	680.525	-0.0003	N	Y
DG 42:10(20:4/22:6)[M+NH4]+	DG 42:10(20:4/22:6)	[M+NH4]+	4.75471	706.54	706.541	-0.0004	N	Y
DG 42:11(20:5/22:6)[M+NH4]+	DG 42:11(20:5/22:6)	[M+NH4]+	4.44823	704.526	704.525	0.0005	N	Y
DG 42:7(20:2/22:5)[M+NH4]+	DG 42:7(20:2/22:5)	[M+NH4]+	5.96447	712.59	712.588	0.0019	N	Y
DG 42:8(20:2/22:6)[M+NH4]+	DG 42:8(20:2/22:6)	[M+NH4]+	5.5089	710.573	710.572	0.0014	17	Y
DG 42:8(20:3/22:5)[M+NH4]+	DG 42:8(20:3/22:5)	[M+NH4]+	5.45212	710.575	710.572	0.0029	N	Y
DG 42:9(20:3/22:6)[M+NH4]+	DG 42:9(20:3/22:6)	[M+NH4]+	5.08247	708.557	708.556	0.0004	N	Y
DG 42:9(20:4/22:5)[M+NH4]+	DG 42:9(20:4/22:5)	[M+NH4]+	5.20663	708.557	708.556	0.0004	N	Y
DG 44:11(22:5/22:6)[M+NH4]+	DG 44:11(22:5/22:6)	[M+NH4]+	5.0379	732.556	732.556	-0.0002	N	Y
DG 44:9(22:4/22:5)[M+NH4]+	DG 44:9(22:4/22:5)	[M+NH4]+	5.68557	736.584	736.588	-0.0035	N	Y
DGDG 32:0(16:0/16:0)[M+Na]+	DGDG 32:0(16:0/16:0)	[M+Na]+	4.94272	915.6	915.602	-0.001779	8	N
DGDG 32:0(16:0/16:0)[M+NH4]+	DGDG 32:0(16:0/16:0)	[M+NH4]+	4.93563	910.643	910.647	-0.0035348	8	N
DGDG 32:0(16:0/16:0)[M-H+HCO2H]-	DGDG 32:0(16:0/16:0)	[M-H+HCO2H]-	4.86523	937.612	937.61	0.0023649	8	N
DGDG 32:1(14:0/18:1)[M+Na]+	DGDG 32:1(14:0/18:1)	[M+Na]+	4.4221	913.587	913.586	0.0006866	8	N
DGDG 32:1(14:0/18:1)[M-H+HCO2H]-	DGDG 32:1(14:0/18:1)	[M-H+HCO2H]-	4.39755	935.596	935.594	0.0015956	8	N
DGDG 32:1(16:0/16:1)[M+NH4]+	DGDG 32:1(16:0/16:1)	[M+NH4]+	4.39643	908.631	908.631	-0.0001536	8	N
DGDG 32:3(16:0/16:3)[M+NH4]+	DGDG 32:3(16:0/16:3)	[M+NH4]+	3.72265	904.601	904.6	0.0008713	N	Y
DGDG 32:3(16:0/16:3)[M-H+HCO2H]-	DGDG 32:3(16:0/16:3)	[M-H+HCO2H]-	3.80882	931.566	931.563	0.0034141	8	N
DGDG 32:3(16:1/16:2)[M-H+HCO2H]-	DGDG 32:3(16:1/16:2)	[M-H+HCO2H]-	3.6815	931.563	931.563	-0.00049215	8	Y
DGDG 32:4(16:1/16:3)[M+NH4]+	DGDG 32:4(16:1/16:3)	[M+NH4]+	3.4161	902.584	902.584	-2e-05	8	Y
DGDG 32:4(16:1/16:3)[M-H+HCO2H]-	DGDG 32:4(16:1/16:3)	[M-H+HCO2H]-	3.42722	929.55	929.547	0.002187	8	Y
DGDG 34:1(16:0/18:1)[M+Na]+	DGDG 34:1(16:0/18:1)	[M+Na]+	4.95913	941.618	941.618	0.0004551	8	Y
DGDG 34:1(16:0/18:1)[M+NH4]+	DGDG 34:1(16:0/18:1)	[M+NH4]+	4.93331	936.662	936.662	-0.000436	8	Y
DGDG 34:1(16:0/18:1)[M-H]-	DGDG 34:1(16:0/18:1)	[M-H]-	4.91952	917.619	917.62	-0.0011615	8	N
DGDG 34:1(16:0/18:1)[M-H+HCO2H]-	DGDG 34:1(16:0/18:1)	[M-H+HCO2H]-	4.95998	963.628	963.626	0.00224915	8	Y
DGDG 34:2(16:0/18:2)[M+Na]+	DGDG 34:2(16:0/18:2)	[M+Na]+	4.48266	939.601	939.602	-0.00155525	8	Y
DGDG 34:2(16:0/18:2)[M+NH4]+	DGDG 34:2(16:0/18:2)	[M+NH4]+	4.48129	934.645	934.647	-0.00141885	8	Y
DGDG 34:2(16:0/18:2)[M-H]-	DGDG 34:2(16:0/18:2)	[M-H]-	4.52207	915.602	915.604	-0.0021871	8	N
DGDG 34:2(16:0/18:2)[M-H+HCO2H]-	DGDG 34:2(16:0/18:2)	[M-H+HCO2H]-	4.46377	961.612	961.61	0.00190715	8	Y
DGDG 34:3(16:0/18:3)[M+Na]+	DGDG 34:3(16:0/18:3)	[M+Na]+	4.13381	937.586	937.586	-0.000351	8	Y
DGDG 34:3(16:0/18:3)[M+NH4]+	DGDG 34:3(16:0/18:3)	[M+NH4]+	4.13244	932.632	932.631	0.00118915	8	Y
DGDG 34:3(16:0/18:3)[M-H]-	DGDG 34:3(16:0/18:3)	[M-H]-	4.16713	913.592	913.589	0.0031594	8	N
DGDG 34:3(16:0/18:3)[M-H+HCO2H]-	DGDG 34:3(16:0/18:3)	[M-H+HCO2H]-	4.11618	959.597	959.594	0.0023382	8	Y
DGDG 34:4(16:2/18:2)[M+Na]+	DGDG 34:4(16:2/18:2)	[M+Na]+	3.75829	935.571	935.571	0.00020725	8	Y
DGDG 34:4(16:2/18:2)[M+NH4]+	DGDG 34:4(16:2/18:2)	[M+NH4]+	3.75101	930.616	930.615	0.0009743	8	Y
DGDG 34:4(16:2/18:2)[M-H]-	DGDG 34:4(16:2/18:2)	[M-H]-	3.78757	911.573	911.573	0.0002539	8	N
DGDG 34:4(16:2/18:2)[M-H+HCO2H]-	DGDG 34:4(16:2/18:2)	[M-H+HCO2H]-	3.73639	957.58	957.579	0.0011519	8	Y
DGDG 34:4(16:3/18:1)[M+NH4]+	DGDG 34:4(16:3/18:1)	[M+NH4]+	3.82627	930.616	930.615	0.0009997	N	Y
DGDG 34:4(16:3/18:1)[M-H+HCO2H]-	DGDG 34:4(16:3/18:1)	[M-H+HCO2H]-	3.84607	957.58	957.579	0.0011519	8	Y
DGDG 34:5(14:0/20:5)[M-H+HCO2H]-	DGDG 34:5(14:0/20:5)	[M-H+HCO2H]-	3.60212	955.567	955.563	0.0040244	8	N
DGDG 34:5(16:3/18:2)[M+Na]+	DGDG 34:5(16:3/18:2)	[M+Na]+	3.48869	933.557	933.555	0.00200145	8	Y
DGDG 34:5(16:3/18:2)[M+NH4]+	DGDG 34:5(16:3/18:2)	[M+NH4]+	3.47006	928.601	928.6	0.0010595	8	Y
DGDG 34:5(16:3/18:2)[M-H]-	DGDG 34:5(16:3/18:2)	[M-H]-	3.48662	909.557	909.558	-0.0001492	8	N
DGDG 34:5(16:3/18:2)[M-H+HCO2H]-	DGDG 34:5(16:3/18:2)	[M-H+HCO2H]-	3.46521	955.565	955.563	0.00242225	8	Y
DGDG 34:6(16:3/18:3)[M+Na]+	DGDG 34:6(16:3/18:3)	[M+Na]+	3.23505	931.542	931.539	0.0030022	8	Y
DGDG 34:6(16:3/18:3)[M+NH4]+	DGDG 34:6(16:3/18:3)	[M+NH4]+	3.27862	926.588	926.584	0.00355055	8	Y
DGDG 34:6(16:3/18:3)[M-H]-	DGDG 34:6(16:3/18:3)	[M-H]-	3.22967	907.543	907.542	0.0011568	8	Y
DGDG 34:6(16:3/18:3)[M-H+HCO2H]-	DGDG 34:6(16:3/18:3)	[M-H+HCO2H]-	3.22133	953.551	953.547	0.0040537	8	Y
DGDG 34:7(16:4/18:3)[M+Na]+	DGDG 34:7(16:4/18:3)	[M+Na]+	3.11357	929.525	929.524	0.0013937	N	Y
DGDG 34:7(16:4/18:3)[M+NH4]+	DGDG 34:7(16:4/18:3)	[M+NH4]+	3.10628	924.568	924.568	-0.0006672	N	Y
DGDG 34:7(16:4/18:3)[M-H+HCO2H]-	DGDG 34:7(16:4/18:3)	[M-H+HCO2H]-	3.12215	951.534	951.532	0.0027911	N	Y
DGDG 36:1(16:0/20:1)[M+Na]+	DGDG 36:1(16:0/20:1)	[M+Na]+	5.4567	969.648	969.649	-0.0006335	8	N
DGDG 36:1(16:0/20:1)[M+NH4]+	DGDG 36:1(16:0/20:1)	[M+NH4]+	5.45429	964.693	964.694	-0.00078465	8	Y
DGDG 36:1(16:0/20:1)[M-H+HCO2H]-	DGDG 36:1(16:0/20:1)	[M-H+HCO2H]-	5.42885	991.656	991.657	-0.00099605	8	Y
DGDG 36:2(16:0/20:2)[M+Na]+	DGDG 36:2(16:0/20:2)	[M+Na]+	5.0121	967.631	967.633	-0.0018903	8	N
DGDG 36:2(16:0/20:2)[M+NH4]+	DGDG 36:2(16:0/20:2)	[M+NH4]+	5.02081	962.677	962.678	-0.0006834	8	Y
DGDG 36:2(16:0/20:2)[M-H+HCO2H]-	DGDG 36:2(16:0/20:2)	[M-H+HCO2H]-	5.00285	989.645	989.641	0.0034744	8	N
DGDG 36:3(16:0/20:3)[M+Na]+	DGDG 36:3(16:0/20:3)	[M+Na]+	4.61465	965.618	965.618	0.0001489	8	N
DGDG 36:3(16:0/20:3)[M+NH4]+	DGDG 36:3(16:0/20:3)	[M+NH4]+	4.62192	960.663	960.662	0.0002724	8	Y
DGDG 36:3(16:0/20:3)[M-H+HCO2H]-	DGDG 36:3(16:0/20:3)	[M-H+HCO2H]-	4.59713	987.629	987.626	0.0031942	8	N
DGDG 36:4(16:0/20:4)[M+Na]+	DGDG 36:4(16:0/20:4)	[M+Na]+	4.30077	963.604	963.602	0.00218805	8	Y
DGDG 36:4(16:0/20:4)[M+NH4]+	DGDG 36:4(16:0/20:4)	[M+NH4]+	4.29105	958.649	958.647	0.00249465	8	Y
DGDG 36:4(16:0/20:4)[M-H]-	DGDG 36:4(16:0/20:4)	[M-H]-	4.4609	939.614	939.604	0.0091775	8	N
DGDG 36:4(16:0/20:4)[M-H+HCO2H]-	DGDG 36:4(16:0/20:4)	[M-H+HCO2H]-	4.29062	985.612	985.61	0.0021511	8	N
DGDG 36:5(16:0/20:5)[M+Na]+	DGDG 36:5(16:0/20:5)	[M+Na]+	4.08552	961.586	961.586	7.68e-05	8	N
DGDG 36:5(16:0/20:5)[M+NH4]+	DGDG 36:5(16:0/20:5)	[M+NH4]+	4.08001	956.631	956.631	0.0002766	8	Y
DGDG 36:5(16:0/20:5)[M-H+HCO2H]-	DGDG 36:5(16:0/20:5)	[M-H+HCO2H]-	4.05768	983.595	983.594	0.0010774	8	Y
DGDG 36:6(16:2/20:4)[M+NH4]+	DGDG 36:6(16:2/20:4)	[M+NH4]+	3.60933	954.614	954.615	-0.0012243	8	N
DGDG 36:6(16:3/20:3)[M+Na]+	DGDG 36:6(16:3/20:3)	[M+Na]+	3.6539	959.571	959.571	0.0005291	8	N
DGDG 36:6(16:3/20:3)[M+NH4]+	DGDG 36:6(16:3/20:3)	[M+NH4]+	3.58983	954.616	954.615	0.001034	N	Y
DGDG 36:6(16:3/20:3)[M-H+HCO2H]-	DGDG 36:6(16:3/20:3)	[M-H+HCO2H]-	3.58455	981.581	981.579	0.00199365	8	Y
DGDG 36:7(16:2/20:5)[M-H+HCO2H]-	DGDG 36:7(16:2/20:5)	[M-H+HCO2H]-	3.4145	979.564	979.563	0.0009138	N	Y
DGDG 36:7(16:3/20:4)[M+Na]+	DGDG 36:7(16:3/20:4)	[M+Na]+	3.31982	957.556	957.555	0.0011644	N	Y
DGDG 36:7(16:3/20:4)[M+NH4]+	DGDG 36:7(16:3/20:4)	[M+NH4]+	3.34227	952.601	952.6	0.00168465	8	Y
DGDG 36:7(16:3/20:4)[M-H+HCO2H]-	DGDG 36:7(16:3/20:4)	[M-H+HCO2H]-	3.32702	979.565	979.563	0.00175305	8	Y
DGTS 30:0(14:0/16:0)[M+H]+	DGTS 30:0(14:0/16:0)	[M+H]+	4.63737	684.577	684.578	-0.0008247	N	Y
DGTS 32:0(16:0/16:0)[M+H]+	DGTS 32:0(16:0/16:0)	[M+H]+	5.15753	712.611	712.609	0.0014385	N	Y
DGTS 32:1(16:0/16:1)[M+H]+	DGTS 32:1(16:0/16:1)	[M+H]+	4.66098	710.594	710.593	0.0006692	N	Y
DGTS 33:1(15:0/18:1)[M+H]+	DGTS 33:1(15:0/18:1)	[M+H]+	4.93657	724.607	724.609	-0.0019733	N	Y
DGTS 34:0(16:0/18:0)[M+H]+	DGTS 34:0(16:0/18:0)	[M+H]+	5.77617	740.639	740.64	-0.0013573	N	Y
DGTS 34:1(16:0/18:1)[M+H]+	DGTS 34:1(16:0/18:1)	[M+H]+	5.19935	738.626	738.625	0.0010938	N	Y
DGTS 34:2(16:0/18:2)[M+H]+	DGTS 34:2(16:0/18:2)	[M+H]+	4.72472	736.608	736.609	-0.0015828	N	Y
DGTS 36:2(18:1/18:1)[M+H]+	DGTS 36:2(18:1/18:1)	[M+H]+	5.24937	764.639	764.64	-0.0012751	N	Y
LysoDGTS 14:0[M+H]+	LysoDGTS 14:0	[M+H]+	0.910017	446.348	446.348	-0.0002091	N	Y
LysoDGTS 15:0[M+H]+	LysoDGTS 15:0	[M+H]+	1.08922	460.363	460.364	-0.0007529	N	Y
LysoDGTS 16:0[M+H]+	LysoDGTS 16:0	[M+H]+	1.34317	474.379	474.379	-0.0002241	N	Y
LysoDGTS 16:1[M+H]+	LysoDGTS 16:1	[M+H]+	0.955567	472.364	472.364	5.18e-05	N	Y
LysoDGTS 18:0[M+H]+	LysoDGTS 18:0	[M+H]+	1.87783	502.409	502.411	-0.0017959	N	Y
LysoDGTS 18:1[M+H]+	LysoDGTS 18:1	[M+H]+	1.39175	500.394	500.395	-0.0007687	N	Y
LysoPC 14:0[M+H]+	LysoPC 14:0	[M+H]+	0.77385	468.31	468.309	0.0006313	N	Y
LysoPC 16:0[M+H]+	LysoPC 16:0	[M+H]+	1.16203	496.34	496.34	5.23e-05	6	Y
LysoPC 18:1[M+H]+	LysoPC 18:1	[M+H]+	1.15335	522.355	522.356	-0.0013857	N	Y
LysoPC 20:2[M+H]+	LysoPC 20:2	[M+H]+	1.44448	548.373	548.372	0.0012027	6	N
LysoPC 20:3[M+H]+	LysoPC 20:3	[M+H]+	1.0757	546.356	546.356	-0.00042445	6	Y
LysoPC 20:4[M+H]+	LysoPC 20:4	[M+H]+	0.860533	544.34	544.34	0.0004541	N	Y
LysoPC 20:5[M+H]+	LysoPC 20:5	[M+H]+	0.722667	542.326	542.325	0.000592	N	Y
LysoPC 22:5[M+H]+	LysoPC 22:5	[M+H]+	1.05292	570.357	570.356	0.0008726	N	Y
LysoPC 22:6[M+H]+	LysoPC 22:6	[M+H]+	0.85775	568.341	568.34	0.0008508	N	Y
LysoPE 16:0[M-H]-	LysoPE 16:0	[M-H]-	1.18939	452.279	452.278	0.00142905	9	Y
MGDG 32:0(16:0/16:0)[M+NH4]+	MGDG 32:0(16:0/16:0)	[M+NH4]+	5.35395	748.591	748.594	-0.0026547	13	N
MGDG 32:0(16:0/16:0)[M-H+HCO2H]-	MGDG 32:0(16:0/16:0)	[M-H+HCO2H]-	5.33828	775.559	775.557	0.0020548	13	N
MGDG 32:1(14:0/18:1)[M-H+HCO2H]-	MGDG 32:1(14:0/18:1)	[M-H+HCO2H]-	4.84583	773.538	773.541	-0.002731	N	Y
MGDG 32:1(16:0/16:1)[M+Na]+	MGDG 32:1(16:0/16:1)	[M+Na]+	4.8463	751.532	751.534	-0.0015461	13	N
MGDG 32:1(16:0/16:1)[M+NH4]+	MGDG 32:1(16:0/16:1)	[M+NH4]+	4.84922	746.577	746.578	-0.0011046	13	N
MGDG 32:1(16:0/16:1)[M-H+HCO2H]-	MGDG 32:1(16:0/16:1)	[M-H+HCO2H]-	4.78998	773.542	773.541	0.0002784	13	N
MGDG 32:2(14:1/18:1)[M-H+HCO2H]-	MGDG 32:2(14:1/18:1)	[M-H+HCO2H]-	4.37652	771.53	771.526	0.0045751	13	N
MGDG 32:3(14:0/18:3)[M+Na]+	MGDG 32:3(14:0/18:3)	[M+Na]+	4.02272	747.501	747.502	-0.0011926	13	N
MGDG 32:3(14:0/18:3)[M+NH4]+	MGDG 32:3(14:0/18:3)	[M+NH4]+	4.04001	742.547	742.547	-0.0001102	13	Y
MGDG 32:3(14:0/18:3)[M-H+HCO2H]-	MGDG 32:3(14:0/18:3)	[M-H+HCO2H]-	4.01157	769.513	769.51	0.00331165	13	Y
MGDG 32:4(16:1/16:3)[M+Na]+	MGDG 32:4(16:1/16:3)	[M+Na]+	3.72018	745.487	745.487	0.00081525	13	Y
MGDG 32:4(16:1/16:3)[M+NH4]+	MGDG 32:4(16:1/16:3)	[M+NH4]+	3.71425	740.531	740.531	-8.595e-05	13	Y
MGDG 32:4(16:1/16:3)[M-H+HCO2H]-	MGDG 32:4(16:1/16:3)	[M-H+HCO2H]-	3.71032	767.496	767.495	0.0007529	13	Y
MGDG 34:0(17:0/17:0)[M+Na]+	MGDG 34:0(17:0/17:0)	[M+Na]+	5.8052	781.582	781.581	0.0014941	13	N
MGDG 34:0(17:0/17:0)[M+NH4]+	MGDG 34:0(17:0/17:0)	[M+NH4]+	5.78748	776.623	776.625	-0.00252	13	N
MGDG 34:0(17:0/17:0)[M-H+HCO2H]-	MGDG 34:0(17:0/17:0)	[M-H+HCO2H]-	5.74223	803.591	803.588	0.0020979	13	N
MGDG 34:1(16:0/18:1)[M+Na]+	MGDG 34:1(16:0/18:1)	[M+Na]+	5.38663	779.566	779.565	0.0009384	13	Y
MGDG 34:1(16:0/18:1)[M+NH4]+	MGDG 34:1(16:0/18:1)	[M+NH4]+	5.3504	774.606	774.609	-0.0035639	13	N
MGDG 34:1(16:0/18:1)[M-H+HCO2H]-	MGDG 34:1(16:0/18:1)	[M-H+HCO2H]-	5.39948	801.574	801.573	0.00141615	13	Y
MGDG 34:2(16:0/18:2)[M+Na]+	MGDG 34:2(16:0/18:2)	[M+Na]+	4.91517	777.549	777.549	-1.39e-05	13	N
MGDG 34:2(16:0/18:2)[M+NH4]+	MGDG 34:2(16:0/18:2)	[M+NH4]+	5.01283	772.596	772.594	0.0017399	13	N
MGDG 34:2(16:0/18:2)[M-H+HCO2H]-	MGDG 34:2(16:0/18:2)	[M-H+HCO2H]-	4.91855	799.559	799.557	0.0022684	13	N
MGDG 34:2(16:1/18:1)[M+NH4]+	MGDG 34:2(16:1/18:1)	[M+NH4]+	4.93018	772.59	772.594	-0.0042619	N	Y
MGDG 34:3(16:0/18:3)[M+Na]+	MGDG 34:3(16:0/18:3)	[M+Na]+	4.50403	775.535	775.534	0.0011089	13	N
MGDG 34:3(16:1/18:2)[M+Na]+	MGDG 34:3(16:1/18:2)	[M+Na]+	4.50192	775.535	775.534	0.0014446	N	Y
MGDG 34:3(16:2/18:1)[M+NH4]+	MGDG 34:3(16:2/18:1)	[M+NH4]+	4.50948	770.578	770.578	-0.0003722	13	N
MGDG 34:3(16:2/18:1)[M-H+HCO2H]-	MGDG 34:3(16:2/18:1)	[M-H+HCO2H]-	4.48627	797.545	797.541	0.00354975	13	Y
MGDG 34:4(14:0/20:4)[M-H+HCO2H]-	MGDG 34:4(14:0/20:4)	[M-H+HCO2H]-	4.24676	795.527	795.526	0.0009351	13	Y
MGDG 34:4(16:2/18:2)[M+Na]+	MGDG 34:4(16:2/18:2)	[M+Na]+	4.16919	773.519	773.518	0.0012755	13	Y
MGDG 34:4(16:2/18:2)[M+NH4]+	MGDG 34:4(16:2/18:2)	[M+NH4]+	4.11228	768.561	768.563	-0.00152395	13	Y
MGDG 34:4(16:2/18:2)[M-H+HCO2H]-	MGDG 34:4(16:2/18:2)	[M-H+HCO2H]-	4.07883	795.527	795.526	0.0009351	13	Y
MGDG 34:5(14:0/20:5)[M-H+HCO2H]-	MGDG 34:5(14:0/20:5)	[M-H+HCO2H]-	3.94187	793.513	793.51	0.00317175	13	Y
MGDG 34:5(16:2/18:3 or 16:3/18:2)[M+Na]+	MGDG 34:5(16:2/18:3 or 16:3/18:2)	[M+Na]+	3.79568	771.502	771.502	-0.0002363	13	N
MGDG 34:5(16:2/18:3 or 16:3/18:2)[M+NH4]+	MGDG 34:5(16:2/18:3 or 16:3/18:2)	[M+NH4]+	3.7846	766.545	766.547	-0.00172355	13	Y
MGDG 34:5(16:2/18:3 or 16:3/18:2)[M-H+HCO2H]-	MGDG 34:5(16:2/18:3 or 16:3/18:2)	[M-H+HCO2H]-	3.75361	793.513	793.51	0.00317175	13	Y
MGDG 34:6(16:3/18:3)[M+Na]+	MGDG 34:6(16:3/18:3)	[M+Na]+	3.53922	769.488	769.487	0.00172065	13	Y
MGDG 34:6(16:3/18:3)[M+NH4]+	MGDG 34:6(16:3/18:3)	[M+NH4]+	3.49283	764.531	764.531	-0.00023445	13	Y
MGDG 34:6(16:3/18:3)[M-H+HCO2H]-	MGDG 34:6(16:3/18:3)	[M-H+HCO2H]-	3.5051	791.499	791.495	0.0039649	13	Y
MGDG 34:6(16:4/18:2)[M+Na]+	MGDG 34:6(16:4/18:2)	[M+Na]+	3.68865	769.487	769.487	0.0006017	13	N
MGDG 34:6(16:4/18:2)[M+NH4]+	MGDG 34:6(16:4/18:2)	[M+NH4]+	3.58317	764.532	764.531	0.0007584	13	N
MGDG 34:6(16:4/18:2)[M-H+HCO2H]-	MGDG 34:6(16:4/18:2)	[M-H+HCO2H]-	3.63893	791.499	791.495	0.0039649	13	Y
MGDG 34:7(16:4/18:3)[M+Na]+	MGDG 34:7(16:4/18:3)	[M+Na]+	3.37876	767.472	767.471	0.00117515	13	Y
MGDG 34:7(16:4/18:3)[M+NH4]+	MGDG 34:7(16:4/18:3)	[M+NH4]+	3.3795	762.518	762.516	0.0024712	13	N
MGDG 34:7(16:4/18:3)[M-H+HCO2H]-	MGDG 34:7(16:4/18:3)	[M-H+HCO2H]-	3.36171	789.482	789.479	0.0031803	13	Y
MGDG 36:1(16:0/20:1)[M+Na]+	MGDG 36:1(16:0/20:1)	[M+Na]+	5.97637	807.596	807.596	-0.0001578	13	N
MGDG 36:1(16:0/20:1)[M+NH4]+	MGDG 36:1(16:0/20:1)	[M+NH4]+	5.95343	802.64	802.641	-0.0004079	13	N
MGDG 36:1(16:0/20:1)[M-H+HCO2H]-	MGDG 36:1(16:0/20:1)	[M-H+HCO2H]-	5.9782	829.607	829.604	0.0028546	13	Y
MGDG 36:2(16:0/20:2)[M+Na]+	MGDG 36:2(16:0/20:2)	[M+Na]+	5.48547	805.581	805.581	0.0008227	13	N
MGDG 36:2(16:0/20:2)[M+NH4]+	MGDG 36:2(16:0/20:2)	[M+NH4]+	5.4641	800.624	800.625	-0.000811	13	N
MGDG 36:2(16:0/20:2)[M-H+HCO2H]-	MGDG 36:2(16:0/20:2)	[M-H+HCO2H]-	5.46528	827.591	827.588	0.00270325	13	Y
MGDG 36:2(18:1/18:1)[M-H+HCO2H]-	MGDG 36:2(18:1/18:1)	[M-H+HCO2H]-	5.40155	827.592	827.588	0.0031355	13	N
MGDG 36:3(16:1/18:2)[M-H+HCO2H]-	MGDG 36:3(16:1/18:2)	[M-H+HCO2H]-	5.09478	825.572	825.573	-0.0014058	N	Y
MGDG 36:3(18:0/18:3)[M+Na]+	MGDG 36:3(18:0/18:3)	[M+Na]+	5.04912	803.563	803.565	-0.0020828	13	N
MGDG 36:3(18:0/18:3)[M+NH4]+	MGDG 36:3(18:0/18:3)	[M+NH4]+	5.08092	798.608	798.609	-0.00191595	13	Y
MGDG 36:3(18:0/18:3)[M-H+HCO2H]-	MGDG 36:3(18:0/18:3)	[M-H+HCO2H]-	5.02437	825.574	825.573	0.0011456	13	N
MGDG 36:4(16:0/20:4)[M+Na]+	MGDG 36:4(16:0/20:4)	[M+Na]+	4.75107	801.55	801.549	0.0007719	13	Y
MGDG 36:4(16:0/20:4)[M+NH4]+	MGDG 36:4(16:0/20:4)	[M+NH4]+	4.75297	796.592	796.594	-0.00188155	13	Y
MGDG 36:4(16:0/20:4)[M-H+HCO2H]-	MGDG 36:4(16:0/20:4)	[M-H+HCO2H]-	4.77388	823.56	823.557	0.00289235	13	Y
MGDG 36:5(16:0/20:5)[M+Na]+	MGDG 36:5(16:0/20:5)	[M+Na]+	4.45462	799.536	799.534	0.002238	N	Y
MGDG 36:5(16:0/20:5)[M+NH4]+	MGDG 36:5(16:0/20:5)	[M+NH4]+	4.42555	794.573	794.578	-0.0047209	N	Y
MGDG 36:5(16:0/20:5)[M-H+HCO2H]-	MGDG 36:5(16:0/20:5)	[M-H+HCO2H]-	4.41013	821.544	821.541	0.0032446	13	Y
MGDG 36:5(16:1/20:4)[M+Na]+	MGDG 36:5(16:1/20:4)	[M+Na]+	4.22843	799.535	799.534	0.0013632	13	N
MGDG 36:5(16:1/20:4)[M+NH4]+	MGDG 36:5(16:1/20:4)	[M+NH4]+	4.23197	794.579	794.578	0.000462	13	N
MGDG 36:5(16:2/20:3)[M-H+HCO2H]-	MGDG 36:5(16:2/20:3)	[M-H+HCO2H]-	4.21325	821.544	821.541	0.0024147	13	N
MGDG 36:6(16:2/20:4)[M+Na]+	MGDG 36:6(16:2/20:4)	[M+Na]+	3.90206	797.52	797.518	0.0022546	13	Y
MGDG 36:6(16:2/20:4)[M+NH4]+	MGDG 36:6(16:2/20:4)	[M+NH4]+	3.9016	792.561	792.563	-0.00142625	13	Y
MGDG 36:6(16:2/20:4)[M-H+HCO2H]-	MGDG 36:6(16:2/20:4)	[M-H+HCO2H]-	3.89698	819.528	819.526	0.00253215	13	Y
MGDG 36:7(16:2/20:5)[M-H+HCO2H]-	MGDG 36:7(16:2/20:5)	[M-H+HCO2H]-	3.70228	817.514	817.51	0.0034091	13	N
MGDG 36:7(16:3/20:4)[M+Na]+	MGDG 36:7(16:3/20:4)	[M+Na]+	3.62423	795.504	795.502	0.00184395	13	Y
MGDG 36:7(16:3/20:4)[M+NH4]+	MGDG 36:7(16:3/20:4)	[M+NH4]+	3.61693	790.548	790.547	0.00124045	13	Y
MGDG 36:7(16:3/20:4)[M-H+HCO2H]-	MGDG 36:7(16:3/20:4)	[M-H+HCO2H]-	3.62442	817.513	817.51	0.0032277	13	Y
MGDG 36:8(16:3/20:5)[M+Na]+	MGDG 36:8(16:3/20:5)	[M+Na]+	3.44012	793.489	793.487	0.0022191	13	Y
MGDG 36:8(16:3/20:5)[M+NH4]+	MGDG 36:8(16:3/20:5)	[M+NH4]+	3.4342	788.532	788.531	0.00099235	13	Y
MGDG 36:8(16:3/20:5)[M-H+HCO2H]-	MGDG 36:8(16:3/20:5)	[M-H+HCO2H]-	3.43452	815.498	815.495	0.00356055	13	Y
MGDG 36:8(16:4/20:4)[M+NH4]+	MGDG 36:8(16:4/20:4)	[M+NH4]+	3.52194	788.532	788.531	0.00099235	13	Y
PA 37:5(17:0/20:5)[M-H]-	PA 37:5(17:0/20:5)	[M-H]-	4.04627	707.469	707.465	0.004	N	Y
PC 28:0[M+H]+	PC 28:0	[M+H]+	3.79538	678.508	678.507	0.0010872	N	Y
PC 28:0[M+Na]+	PC 28:0	[M+Na]+	3.829	700.492	700.489	0.0029434	N	Y
PC 29:0[M+H]+	PC 29:0	[M+H]+	4.04088	692.525	692.523	0.002116	N	Y
PC 30:0[M+H]+	PC 30:0	[M+H]+	4.65035	720.555	720.554	0.00075745	6	Y
PC 30:0[M+Na]+	PC 30:0	[M+Na]+	4.36733	728.523	728.521	0.0024375	N	Y
PC 30:1[M+H]+	PC 30:1	[M+H]+	3.91812	704.526	704.523	0.0025737	N	Y
PC 31:0[M+H]+	PC 31:0	[M+H]+	4.5819	720.554	720.554	0.0001992	N	Y
PC 32:0[M+H]+	PC 32:0	[M+H]+	4.86378	734.57	734.57	-0.0001453	N	Y
PC 32:1[M+H]+	PC 32:1	[M+H]+	4.37553	732.556	732.554	0.0021676	N	Y
PC 33:1[M+H]+	PC 33:1	[M+H]+	4.67647	746.574	746.57	0.0035168	N	Y
PC 33:3[M+H]+	PC 33:3	[M+H]+	3.88723	742.539	742.539	-0.0004868	N	Y
PC 34:0[M+H]+	PC 34:0	[M+H]+	5.26635	762.6	762.601	-0.0010913	6	N
PC 34:1[M+H]+	PC 34:1	[M+H]+	4.9477	760.586	760.586	-0.00026685	6	Y
PC 34:1[M+Na]+	PC 34:1	[M+Na]+	4.93473	782.571	782.568	0.0034478	N	Y
PC 34:2[M+H]+	PC 34:2	[M+H]+	4.48104	758.57	758.57	-8.4e-06	6	Y
PC 34:3[M+H]+	PC 34:3	[M+H]+	4.07177	756.556	756.554	0.001542	N	Y
PC 34:5[M+H]+	PC 34:5	[M+H]+	3.60973	752.524	752.523	0.0008724	6	Y
PC 34:5[M+Na]+	PC 34:5	[M+Na]+	3.62528	774.507	774.505	0.0023853	N	Y
PC 35:1[M+H]+	PC 35:1	[M+H]+	5.22433	774.6	774.601	-0.00111335	6	Y
PC 35:2[M+H]+	PC 35:2	[M+H]+	4.72107	772.59	772.586	0.0035793	N	Y
PC 35:3[M+H]+	PC 35:3	[M+H]+	4.33372	770.573	770.57	0.0026725	N	Y
PC 35:4[M+H]+	PC 35:4	[M+H]+	4.05182	768.559	768.554	0.0047646	N	Y
PC 36:1[M+H]+	PC 36:1	[M+H]+	5.59234	788.613	788.617	-0.0039617	6	Y
PC 36:2[M+H]+	PC 36:2	[M+H]+	5.09043	786.601	786.601	5.15e-06	6	Y
PC 36:2[M+Na]+	PC 36:2	[M+Na]+	5.02947	808.585	808.583	0.002337	6	Y
PC 36:3[M+H]+	PC 36:3	[M+H]+	4.65004	784.585	784.586	-0.000483	6	Y
PC 36:3[M+Na]+	PC 36:3	[M+Na]+	4.57735	806.57	806.568	0.0020684	N	Y
PC 36:4[M+H]+	PC 36:4	[M+H]+	4.34535	782.57	782.57	-0.0002774	6	Y
PC 36:4[M+Na]+	PC 36:4	[M+Na]+	4.43842	804.552	804.552	0.00049785	6	Y
PC 36:5[M+H]+	PC 36:5	[M+H]+	4.08179	780.555	780.554	0.00081215	6	Y
PC 36:5[M+Na]+	PC 36:5	[M+Na]+	4.03907	802.538	802.536	0.0020118	6	Y
PC 36:6[M+H]+	PC 36:6	[M+H]+	3.75612	778.538	778.539	-0.00080775	6	Y
PC 36:6[M+Na]+	PC 36:6	[M+Na]+	3.80175	800.524	800.521	0.0032004	N	Y
PC 37:1[M+H]+	PC 37:1	[M+H]+	5.72465	802.636	802.633	0.0026506	N	Y
PC 37:2[M+H]+	PC 37:2	[M+H]+	5.4002	800.616	800.617	-0.000728	6	N
PC 37:5[M+H]+	PC 37:5	[M+H]+	4.34356	794.571	794.57	0.0011441	6	Y
PC 38:2[M+H]+	PC 38:2	[M+H]+	5.78674	814.631	814.633	-0.00136805	6	Y
PC 38:2[M+Na]+	PC 38:2	[M+Na]+	5.81075	836.618	836.615	0.0031844	N	Y
PC 38:3[M+H]+	PC 38:3	[M+H]+	5.13112	812.617	812.617	0.0001672	N	Y
PC 38:4[M+H]+	PC 38:4	[M+H]+	5.01578	810.598	810.601	-0.0029113	6	N
PC 38:5[M+H]+	PC 38:5	[M+H]+	4.58961	808.585	808.586	-0.000363	6	Y
PC 38:5[M+Na]+	PC 38:5	[M+Na]+	4.61092	830.57	830.567	0.00217775	6	Y
PC 38:6[M+H]+	PC 38:6	[M+H]+	4.17028	806.57	806.57	-0.0003436	6	Y
PC 38:6[M+Na]+	PC 38:6	[M+Na]+	4.28677	828.554	828.551	0.003126	6	N
PC 40:10[M+Na]+	PC 40:10	[M+Na]+	3.4171	848.522	848.521	0.0007285	N	Y
PC 40:5[M+H]+	PC 40:5	[M+H]+	4.83562	836.618	836.617	0.0011844	N	Y
PC 40:6[M+H]+	PC 40:6	[M+H]+	4.50655	834.601	834.601	-0.000558	6	Y
PC 40:7[M+H]+	PC 40:7	[M+H]+	4.17116	832.586	832.586	0.00011515	6	Y
PC 40:7[M+Na]+	PC 40:7	[M+Na]+	4.22803	854.569	854.568	0.00121655	6	Y
PC 40:8[M+H]+	PC 40:8	[M+H]+	3.86949	830.57	830.57	-0.00032225	6	Y
PC 40:8[M+Na]+	PC 40:8	[M+Na]+	3.87224	852.555	852.552	0.0037597	6	Y
PC 40:9[M+H]+	PC 40:9	[M+H]+	3.66152	828.555	828.554	0.00042155	6	Y
PC 40:9[M+Na]+	PC 40:9	[M+Na]+	3.62073	850.538	850.536	0.0015671	N	Y
PC 42:10[M+H]+	PC 42:10	[M+H]+	3.80659	854.569	854.57	-0.00098345	6	Y
PC 42:10[M+Na]+	PC 42:10	[M+Na]+	3.8372	876.554	876.552	0.0021382	N	Y
PC 42:11[M+H]+	PC 42:11	[M+H]+	3.62486	852.555	852.554	0.0011097	6	Y
PC 42:11[M+Na]+	PC 42:11	[M+Na]+	3.58347	874.54	874.536	0.0035508	N	Y
PC 42:5[M+H]+	PC 42:5	[M+H]+	5.35107	864.645	864.648	-0.0036382	6	N
PC 42:6[M+H]+	PC 42:6	[M+H]+	4.93496	862.633	862.633	0.00028715	6	Y
PC 42:7[M+H]+	PC 42:7	[M+H]+	4.74507	860.618	860.617	0.000808	6	Y
PC 42:8[M+H]+	PC 42:8	[M+H]+	4.37839	858.601	858.601	-0.0001597	6	Y
PC 42:8[M+Na]+	PC 42:8	[M+Na]+	4.37827	880.586	880.583	0.0030189	N	Y
PC 42:9[M+H]+	PC 42:9	[M+H]+	4.08178	856.587	856.586	0.0007631	6	Y
PC 42:9[M+Na]+	PC 42:9	[M+Na]+	4.04362	878.569	878.568	0.0013665	N	Y
PC 44:10[M+H]+	PC 44:10	[M+H]+	4.2136	882.6	882.601	-0.0011465	N	Y
PC 44:11[M+H]+	PC 44:11	[M+H]+	3.87993	880.586	880.586	1.89e-05	N	Y
PC 44:12[M+H]+	PC 44:12	[M+H]+	3.73718	878.569	878.57	-0.0006335	N	Y
PE 32:1[M+H]+	PE 32:1	[M+H]+	4.53462	690.507	690.507	-0.0002109	N	Y
PE 34:1(16:0/18:1)[M+H]+	PE 34:1(16:0/18:1)	[M+H]+	5.101	718.538	718.539	-0.00055	9	Y
PE 34:1(16:0/18:1)[M-H]-	PE 34:1(16:0/18:1)	[M-H]-	5.08661	716.525	716.523	0.0022826	9	Y
PE 34:4[M+H]+	PE 34:4	[M+H]+	4.04635	712.492	712.492	0.0002485	N	Y
PE 36:2(18:1/18:1)[M+H]+	PE 36:2(18:1/18:1)	[M+H]+	5.1293	744.556	744.554	0.0012001	N	Y
PE 36:3(16:3/20:3)[M-H]-	PE 36:3(16:3/20:3)	[M-H]-	4.80263	740.526	740.523	0.0025725	N	Y
PE 36:4(16:0/20:4)[M+H]+	PE 36:4(16:0/20:4)	[M+H]+	4.59282	740.523	740.523	0.0003643	9	Y
PE 36:4(16:0/20:4)[M-H]-	PE 36:4(16:0/20:4)	[M-H]-	4.51922	738.511	738.507	0.0035733	9	Y
PE 36:5(16:0/20:5)[M+H]+	PE 36:5(16:0/20:5)	[M+H]+	4.19528	738.507	738.507	2.23e-05	9	Y
PE 36:5(16:0/20:5)[M-H]-	PE 36:5(16:0/20:5)	[M-H]-	4.19542	736.493	736.492	0.00164435	9	Y
PE 36:6(14:0/22:6)[M+H]+	PE 36:6(14:0/22:6)	[M+H]+	3.92632	736.494	736.492	0.0027422	N	Y
PE 38:2(18:1/20:1)[M+H]+	PE 38:2(18:1/20:1)	[M+H]+	5.46942	772.59	772.586	0.0035793	N	Y
PE 38:2(18:1/20:1)[M-H]-	PE 38:2(18:1/20:1)	[M-H]-	5.48148	770.561	770.57	-0.0090369	N	Y
PE 38:4(18:0/20:4)[M+H]+	PE 38:4(18:0/20:4)	[M+H]+	5.13932	768.559	768.554	0.0044746	N	Y
PE 38:5(16:0/22:5)[M+H]+	PE 38:5(16:0/22:5)	[M+H]+	4.75905	766.538	766.539	-0.0005235	9	N
PE 38:5(16:0/22:5)[M-H]-	PE 38:5(16:0/22:5)	[M-H]-	4.73991	764.526	764.523	0.0026653	9	Y
PE 38:6(16:0/22:6)[M+H]+	PE 38:6(16:0/22:6)	[M+H]+	4.41267	764.525	764.523	0.0016682	9	N
PE 38:6(16:0/22:6)[M-H]-	PE 38:6(16:0/22:6)	[M-H]-	4.38843	762.512	762.507	0.00415515	9	Y
PE 42:7(20:2/22:5)[M+H]+	PE 42:7(20:2/22:5)	[M+H]+	4.88837	818.571	818.57	0.0011975	N	Y
PG 32:0(16:0/16:0)[M-H]-	PG 32:0(16:0/16:0)	[M-H]-	4.41022	721.505	721.502	0.0029494	8	N
PG 34:0(16:0/18:0)[M-H]-	PG 34:0(16:0/18:0)	[M-H]-	4.91753	749.535	749.533	0.0019245	8	N
PG 34:1(16:0/18:1)[M+H]+	PG 34:1(16:0/18:1)	[M+H]+	3.62802	743.485	743.484	0.0015948	N	Y
PG 34:1(16:0/18:1)[M-H]-	PG 34:1(16:0/18:1)	[M-H]-	4.4315	747.52	747.518	0.0020661	N	Y
PG 34:3(16:1/18:2)[M-H]-	PG 34:3(16:1/18:2)	[M-H]-	3.88995	743.488	743.486	0.0018093	N	Y
PG 34:4(16:1/18:3)[M-H]-	PG 34:4(16:1/18:3)	[M-H]-	3.60692	741.473	741.471	0.0024439	N	Y
PG 34:6[M-H]-	PG 34:6	[M-H]-	2.9031	737.436	737.439	-0.0036677	8	N
PG 36:1(16:0/20:1)[M-H]-	PG 36:1(16:0/20:1)	[M-H]-	4.93198	775.552	775.549	0.00289717	8	Y
PG 36:2(18:1/18:1)[M-H]-	PG 36:2(18:1/18:1)	[M-H]-	4.61051	773.532	773.533	-0.00143247	8	Y
PI 36:4(16:0/20:4)[M-H]-	PI 36:4(16:0/20:4)	[M-H]-	3.86445	857.521	857.518	0.0028391	3	Y
PI 38:5(16:0/22:5)[M-H]-	PI 38:5(16:0/22:5)	[M-H]-	4.00663	883.534	883.534	0.0008549	3	Y
PI 42:7(20:2/22:5)[M-H]-	PI 42:7(20:2/22:5)	[M-H]-	4.13723	935.566	935.565	0.0007	N	Y
plasmenyl-PE 36:1(P-18:0/18:1)[M-H]-	plasmenyl-PE 36:1(P-18:0/18:1)	[M-H]-	5.49471	728.56	728.559	0.0010586	9	Y
SQDG 30:0(14:0/16:0)[M-H]-	SQDG 30:0(14:0/16:0)	[M-H]-	3.69398	765.485	765.482	0.0025017	5	Y
SQDG 31:0(15:0/16:0)[M-H]-	SQDG 31:0(15:0/16:0)	[M-H]-	3.91475	779.5	779.498	0.0024967	N	Y
SQDG 32:0(16:0/16:0)[M+NH4]+	SQDG 32:0(16:0/16:0)	[M+NH4]+	4.21646	812.557	812.556	0.0013604	5	Y
SQDG 32:0(16:0/16:0)[M-H]-	SQDG 32:0(16:0/16:0)	[M-H]-	4.20444	793.514	793.514	1.535e-05	5	Y
SQDG 32:1(16:0/16:1)[M+NH4]+	SQDG 32:1(16:0/16:1)	[M+NH4]+	3.78652	810.541	810.54	0.00106295	5	Y
SQDG 32:1(16:0/16:1)[M-H]-	SQDG 32:1(16:0/16:1)	[M-H]-	3.78743	791.499	791.498	0.00128365	5	Y
SQDG 32:2[M-H]-	SQDG 32:2	[M-H]-	3.50914	789.484	789.482	0.0013621	5	Y
SQDG 32:3[M+NH4]+	SQDG 32:3	[M+NH4]+	3.24085	806.513	806.509	0.004302	N	Y
SQDG 32:3[M-H]-	SQDG 32:3	[M-H]-	3.25978	787.471	787.467	0.0044236	5	Y
SQDG 33:0(16:0/17:0)[M-H]-	SQDG 33:0(16:0/17:0)	[M-H]-	4.3846	807.529	807.529	-3.88e-05	5	N
SQDG 34:0[M+Na]+	SQDG 34:0	[M+Na]+	4.70597	845.541	845.542	-0.0019127	5	N
SQDG 34:0[M+NH4]+	SQDG 34:0	[M+NH4]+	4.68673	840.588	840.587	0.000637	5	N
SQDG 34:0[M-H]-	SQDG 34:0	[M-H]-	4.6865	821.545	821.545	0.0005551	5	Y
SQDG 34:1(16:0/18:1)[M+Na]+	SQDG 34:1(16:0/18:1)	[M+Na]+	4.25753	843.53	843.527	0.0031783	5	N
SQDG 34:1(16:0/18:1)[M+NH4]+	SQDG 34:1(16:0/18:1)	[M+NH4]+	4.20427	838.573	838.571	0.0011503	5	Y
SQDG 34:1(16:0/18:1)[M-H]-	SQDG 34:1(16:0/18:1)	[M-H]-	4.18403	819.53	819.529	0.0010963	5	Y
SQDG 34:2[M+NH4]+	SQDG 34:2	[M+NH4]+	3.86995	836.556	836.556	0.0004734	5	Y
SQDG 34:2[M-H]-	SQDG 34:2	[M-H]-	3.83713	817.514	817.514	0.0004398	5	Y
SQDG 34:3(16:0/18:3)[M+NH4]+	SQDG 34:3(16:0/18:3)	[M+NH4]+	3.59052	834.542	834.54	0.00170385	5	Y
SQDG 34:3(16:0/18:3)[M-H]-	SQDG 34:3(16:0/18:3)	[M-H]-	3.58926	815.5	815.498	0.00168295	5	Y
SQDG 34:4(16:0/18:4)[M-H]-	SQDG 34:4(16:0/18:4)	[M-H]-	3.32238	813.486	813.482	0.0037424	N	Y
SQDG 34:5[M+NH4]+	SQDG 34:5	[M+NH4]+	3.20723	830.511	830.509	0.0025625	N	Y
SQDG 34:5[M-H]-	SQDG 34:5	[M-H]-	3.09042	811.471	811.467	0.0043676	N	Y
SQDG 36:4(18:0/18:4)[M+NH4]+	SQDG 36:4(18:0/18:4)	[M+NH4]+	3.80448	860.557	860.556	0.0011448	N	Y
SQDG 36:4(18:0/18:4)[M-H]-	SQDG 36:4(18:0/18:4)	[M-H]-	3.78958	841.516	841.514	0.0023802	5	N
SQDG 36:5(16:0/20:5)[M+NH4]+	SQDG 36:5(16:0/20:5)	[M+NH4]+	3.53345	858.542	858.54	0.001658	N	Y
SQDG 36:5(16:0/20:5)[M-H]-	SQDG 36:5(16:0/20:5)	[M-H]-	3.52699	839.499	839.498	0.0014744	5	Y
SQDG 36:6[M-H]-	SQDG 36:6	[M-H]-	3.2679	837.486	837.482	0.0040476	N	Y
TG 42:1(12:0/14:0/16:1)[M+NH4]+	TG 42:1(12:0/14:0/16:1)	[M+NH4]+	8.22431	738.659	738.661	-0.002	17	N
TG 42:2(12:0/14:1/16:1)[M+NH4]+	TG 42:2(12:0/14:1/16:1)	[M+NH4]+	7.75637	736.647	736.645	0.0016	N	Y
TG 44:1(12:0/16:1/16:0)[M+NH4]+	TG 44:1(12:0/16:1/16:0)	[M+NH4]+	8.9512	766.691	766.692	-0.0012	N	Y
TG 44:1(14:0/16:1/14:0)[M+NH4]+	TG 44:1(14:0/16:1/14:0)	[M+NH4]+	8.9503	766.691	766.692	-0.0012	N	Y
TG 44:2(12:0/14:1/18:1)[M+NH4]+	TG 44:2(12:0/14:1/18:1)	[M+NH4]+	8.28112	764.674	764.676	-0.0028	17	N
TG 46:0(12:0/16:0/18:0)[M+NH4]+	TG 46:0(12:0/16:0/18:0)	[M+NH4]+	9.87998	796.739	796.739	0	17	N
TG 46:0(14:0/16:0/16:0)[M+NH4]+	TG 46:0(14:0/16:0/16:0)	[M+NH4]+	9.81552	796.741	796.739	0.002	17	Y
TG 46:1(14:0/16:0/16:1)[M+Na]+	TG 46:1(14:0/16:0/16:1)	[M+Na]+	9.38305	799.681	799.679	0.0023	17	N
TG 46:1(14:0/16:0/16:1)[M+NH4]+	TG 46:1(14:0/16:0/16:1)	[M+NH4]+	9.39707	794.724	794.723	0.0005	N	Y
TG 46:2(12:0/18:1/16:1)[M+NH4]+	TG 46:2(12:0/18:1/16:1)	[M+NH4]+	8.86541	792.704	792.708	-0.004	N	Y
TG 48:0(14:0/16:0/18:0)[M+NH4]+	TG 48:0(14:0/16:0/18:0)	[M+NH4]+	10.3168	824.772	824.77	0.00215	17	Y
TG 48:1(14:0/16:0/18:1)[M+NH4]+	TG 48:1(14:0/16:0/18:1)	[M+NH4]+	9.87135	822.757	822.755	0.0024	17	Y
TG 48:2(14:0/16:1/18:1)[M+NH4]+	TG 48:2(14:0/16:1/18:1)	[M+NH4]+	9.37877	820.743	820.739	0.00375	17	Y
TG 48:2(16:0/16:1/16:1)[M+NH4]+	TG 48:2(16:0/16:1/16:1)	[M+NH4]+	9.46032	820.742	820.739	0.003	17	N
TG 48:3(14:1/16:1/18:1)[M+NH4]+	TG 48:3(14:1/16:1/18:1)	[M+NH4]+	8.92499	818.722	818.723	-0.0013	17	Y
TG 49:1(16:0/16:0/17:1)[M+NH4]+	TG 49:1(16:0/16:0/17:1)	[M+NH4]+	10.0413	836.774	836.77	0.00375	17	Y
TG 49:1(16:0/16:1/17:0)[M+NH4]+	TG 49:1(16:0/16:1/17:0)	[M+NH4]+	10.0754	836.774	836.77	0.00375	17	Y
TG 49:2(16:0/16:0/17:2)[M+NH4]+	TG 49:2(16:0/16:0/17:2)	[M+NH4]+	9.74482	834.758	834.755	0.0029	N	Y
TG 49:2(16:0/16:1/17:1)[M+NH4]+	TG 49:2(16:0/16:1/17:1)	[M+NH4]+	9.65275	834.758	834.755	0.0032	17	Y
TG 49:3(16:1/16:1/17:1)[M+NH4]+	TG 49:3(16:1/16:1/17:1)	[M+NH4]+	9.15665	832.734	832.739	-0.005	N	Y
TG 50:0(16:0/16:0/18:0)[M+NH4]+	TG 50:0(16:0/16:0/18:0)	[M+NH4]+	10.7491	852.802	852.802	0.0002	17	Y
TG 50:1(16:0/16:0/18:1)[M+NH4]+	TG 50:1(16:0/16:0/18:1)	[M+NH4]+	10.3367	850.788	850.786	0.0023	N	Y
TG 50:2(16:0/16:1/18:1)[M+Na]+	TG 50:2(16:0/16:1/18:1)	[M+Na]+	9.8157	853.73	853.726	0.0045	N	Y
TG 50:2(16:0/16:1/18:1)[M+NH4]+	TG 50:2(16:0/16:1/18:1)	[M+NH4]+	9.88487	848.772	848.77	0.0019	17	N
TG 50:3(16:0/16:0/18:3)[M+Na]+	TG 50:3(16:0/16:0/18:3)	[M+Na]+	9.49755	851.711	851.71	0.0012	N	Y
TG 50:3(16:0/16:0/18:3)[M+NH4]+	TG 50:3(16:0/16:0/18:3)	[M+NH4]+	9.53896	846.757	846.755	0.0026	17	N
TG 50:3(16:0/16:1/18:2)[M+Na]+	TG 50:3(16:0/16:1/18:2)	[M+Na]+	9.41937	851.711	851.71	0.0012	N	Y
TG 50:3(16:0/16:1/18:2)[M+NH4]+	TG 50:3(16:0/16:1/18:2)	[M+NH4]+	9.43307	846.757	846.755	0.0022	17	Y
TG 50:4(16:0/16:1/18:3)[M+NH4]+	TG 50:4(16:0/16:1/18:3)	[M+NH4]+	9.08196	844.74	844.739	0.0006	17	Y
TG 51:0(16:0/17:0/18:0)[M+NH4]+	TG 51:0(16:0/17:0/18:0)	[M+NH4]+	10.9335	866.819	866.817	0.0019	17	N
TG 51:1(16:0/17:0/18:1)[M+Na]+	TG 51:1(16:0/17:0/18:1)	[M+Na]+	10.4958	869.761	869.757	0.0038	N	Y
TG 51:1(16:0/17:0/18:1)[M+NH4]+	TG 51:1(16:0/17:0/18:1)	[M+NH4]+	10.5023	864.804	864.802	0.00285	17	Y
TG 51:2(16:0/17:0/18:2)[M+NH4]+	TG 51:2(16:0/17:0/18:2)	[M+NH4]+	10.1788	862.789	862.786	0.003	17	N
TG 51:2(16:0/17:1/18:1)[M+NH4]+	TG 51:2(16:0/17:1/18:1)	[M+NH4]+	10.068	862.789	862.786	0.00275	17	Y
TG 51:2(17:0/17:1/17:1)[M+NH4]+	TG 51:2(17:0/17:1/17:1)	[M+NH4]+	10.1998	862.788	862.786	0.0025	N	Y
TG 51:3(16:0/17:0/18:3)[M+NH4]+	TG 51:3(16:0/17:0/18:3)	[M+NH4]+	9.78117	860.773	860.77	0.0031	N	Y
TG 51:3(16:0/17:1/18:2)[M+NH4]+	TG 51:3(16:0/17:1/18:2)	[M+NH4]+	9.70967	860.772	860.77	0.0014	17	N
TG 51:3(16:0/17:2/18:1)[M+NH4]+	TG 51:3(16:0/17:2/18:1)	[M+NH4]+	9.65735	860.772	860.77	0.00225	17	Y
TG 51:3(16:1/17:1/18:1)[M+NH4]+	TG 51:3(16:1/17:1/18:1)	[M+NH4]+	9.70875	860.772	860.77	0.0014	17	N
TG 51:4(16:0/17:1/18:3)[M+NH4]+	TG 51:4(16:0/17:1/18:3)	[M+NH4]+	9.31958	858.756	858.755	0.00175	17	Y
TG 51:5(16:1/17:1/18:3)[M+NH4]+	TG 51:5(16:1/17:1/18:3)	[M+NH4]+	8.8639	856.741	856.739	0.0017	N	Y
TG 51:6(16:1/17:2/18:3)[M+NH4]+	TG 51:6(16:1/17:2/18:3)	[M+NH4]+	8.41468	854.724	854.723	0.0003	N	Y
TG 52:0(16:0/18:0/18:0)[M+NH4]+	TG 52:0(16:0/18:0/18:0)	[M+NH4]+	11.1364	880.833	880.833	0.00065	17	Y
TG 52:1(16:0/18:0/18:1)[M+Na]+	TG 52:1(16:0/18:0/18:1)	[M+Na]+	10.7032	883.775	883.773	0.0023	17	N
TG 52:1(16:0/18:0/18:1)[M+NH4]+	TG 52:1(16:0/18:0/18:1)	[M+NH4]+	10.7273	878.818	878.817	0.001	N	Y
TG 52:2(16:0/18:1/18:1)[M+Na]+	TG 52:2(16:0/18:1/18:1)	[M+Na]+	10.2701	881.761	881.757	0.0042	17	N
TG 52:2(16:0/18:1/18:1)[M+NH4]+	TG 52:2(16:0/18:1/18:1)	[M+NH4]+	10.3106	876.806	876.801	0.0047	17	N
TG 52:3(16:0/16:0/20:3)[M+NH4]+	TG 52:3(16:0/16:0/20:3)	[M+NH4]+	10.0033	874.788	874.786	0.002	17	N
TG 52:3(16:0/16:1/20:2)[M+NH4]+	TG 52:3(16:0/16:1/20:2)	[M+NH4]+	9.86236	874.788	874.786	0.002	17	N
TG 52:3(16:0/18:0/18:3)[M+NH4]+	TG 52:3(16:0/18:0/18:3)	[M+NH4]+	10.0024	874.788	874.786	0.002	17	N
TG 52:3(16:0/18:1/18:2)[M+NH4]+	TG 52:3(16:0/18:1/18:2)	[M+NH4]+	9.91738	874.788	874.786	0.002	17	N
TG 52:4(16:0/16:0/20:4)[M+Na]+	TG 52:4(16:0/16:0/20:4)	[M+Na]+	9.7348	877.73	877.726	0.0039	N	Y
TG 52:4(16:0/16:0/20:4)[M+NH4]+	TG 52:4(16:0/16:0/20:4)	[M+NH4]+	9.74	872.77	872.77	-0.0003	17	Y
TG 52:4(16:0/18:1/18:3)[M+Na]+	TG 52:4(16:0/18:1/18:3)	[M+Na]+	9.50028	877.73	877.726	0.0039	N	Y
TG 52:4(16:0/18:1/18:3)[M+NH4]+	TG 52:4(16:0/18:1/18:3)	[M+NH4]+	9.55029	872.77	872.77	-0.0003	17	Y
TG 52:5(16:0/16:0/20:5)[M+NH4]+	TG 52:5(16:0/16:0/20:5)	[M+NH4]+	9.39388	870.756	870.755	0.0015	N	Y
TG 52:5(16:0/16:1/20:4)[M+NH4]+	TG 52:5(16:0/16:1/20:4)	[M+NH4]+	9.20116	870.756	870.755	0.0015	N	Y
TG 52:6(16:0/16:1/20:5)[M+NH4]+	TG 52:6(16:0/16:1/20:5)	[M+NH4]+	8.89594	868.739	868.739	-0.00035	17	Y
TG 52:6(16:0/18:3/18:3)[M+NH4]+	TG 52:6(16:0/18:3/18:3)	[M+NH4]+	8.70012	868.739	868.739	-0.00035	17	Y
TG 52:6(16:1/16:1/20:4)[M+NH4]+	TG 52:6(16:1/16:1/20:4)	[M+NH4]+	8.77208	868.742	868.739	0.0026	N	Y
TG 52:6(16:1/18:2/18:3)[M+NH4]+	TG 52:6(16:1/18:2/18:3)	[M+NH4]+	8.60793	868.742	868.739	0.0026	N	Y
TG 52:7(16:1/16:1/20:5)[M+NH4]+	TG 52:7(16:1/16:1/20:5)	[M+NH4]+	8.42652	866.723	866.723	-0.0007	17	N
TG 53:1(17:0/18:0/18:1)[M+NH4]+	TG 53:1(17:0/18:0/18:1)	[M+NH4]+	10.9257	892.834	892.833	0.0008	17	Y
TG 53:2(17:0/18:1/18:1)[M+NH4]+	TG 53:2(17:0/18:1/18:1)	[M+NH4]+	10.5079	890.82	890.817	0.0026	N	Y
TG 53:2(17:1/18:0/18:1)[M+NH4]+	TG 53:2(17:1/18:0/18:1)	[M+NH4]+	10.5649	890.82	890.817	0.0026	N	Y
TG 53:3(16:0/17:1/20:2)[M+NH4]+	TG 53:3(16:0/17:1/20:2)	[M+NH4]+	10.0923	888.804	888.802	0.00215	17	Y
TG 53:3(17:0/18:1/18:2)[M+NH4]+	TG 53:3(17:0/18:1/18:2)	[M+NH4]+	10.1401	888.804	888.802	0.00215	17	Y
TG 53:3(17:1/18:1/18:1)[M+NH4]+	TG 53:3(17:1/18:1/18:1)	[M+NH4]+	10.0567	888.804	888.802	0.0021	17	N
TG 53:4(16:0/17:0/20:4)[M+NH4]+	TG 53:4(16:0/17:0/20:4)	[M+NH4]+	9.98906	886.79	886.786	0.0039	17	Y
TG 53:4(16:0/17:1/20:3)[M+NH4]+	TG 53:4(16:0/17:1/20:3)	[M+NH4]+	9.75867	886.79	886.786	0.0039	17	Y
TG 53:4(17:0/18:1/18:3)[M+NH4]+	TG 53:4(17:0/18:1/18:3)	[M+NH4]+	9.81297	886.79	886.786	0.0038	N	Y
TG 53:5(16:0/17:0/20:5)[M+NH4]+	TG 53:5(16:0/17:0/20:5)	[M+NH4]+	9.64789	884.771	884.77	0.00085	17	Y
TG 53:5(16:0/17:1/20:4)[M+NH4]+	TG 53:5(16:0/17:1/20:4)	[M+NH4]+	9.41999	884.771	884.77	0.00085	17	Y
TG 53:5(17:2/18:1/18:2)[M+NH4]+	TG 53:5(17:2/18:1/18:2)	[M+NH4]+	9.36025	884.769	884.77	-0.001	N	Y
TG 54:0(16:0/18:0/20:0)[M+NH4]+	TG 54:0(16:0/18:0/20:0)	[M+NH4]+	11.4465	908.864	908.864	-0.0001	17	N
TG 54:1(16:0/16:1/22:0)[M+NH4]+	TG 54:1(16:0/16:1/22:0)	[M+NH4]+	11.093	906.851	906.848	0.0031	17	N
TG 54:1(16:0/18:1/20:0)[M+NH4]+	TG 54:1(16:0/18:1/20:0)	[M+NH4]+	11.1112	906.849	906.848	0.0008	N	Y
TG 54:1(16:1/18:0/20:0)[M+NH4]+	TG 54:1(16:1/18:0/20:0)	[M+NH4]+	11.0939	906.851	906.848	0.0031	17	N
TG 54:1(18:0/18:0/18:1)[M+NH4]+	TG 54:1(18:0/18:0/18:1)	[M+NH4]+	11.1121	906.849	906.848	0.0008	N	Y
TG 54:2(18:0/18:1/18:1)[M+NH4]+	TG 54:2(18:0/18:1/18:1)	[M+NH4]+	10.7308	904.835	904.833	0.00195	17	Y
TG 54:3(16:0/18:0/20:3)[M+NH4]+	TG 54:3(16:0/18:0/20:3)	[M+NH4]+	10.454	902.82	902.817	0.0026	N	Y
TG 54:3(16:0/18:1/20:2)[M+Na]+	TG 54:3(16:0/18:1/20:2)	[M+Na]+	10.3594	907.777	907.773	0.004	N	Y
TG 54:3(16:0/18:1/20:2)[M+NH4]+	TG 54:3(16:0/18:1/20:2)	[M+NH4]+	10.3089	902.82	902.817	0.0026	N	Y
TG 54:3(18:0/18:1/18:2)[M+NH4]+	TG 54:3(18:0/18:1/18:2)	[M+NH4]+	10.4531	902.82	902.817	0.0026	N	Y
TG 54:4(16:0/18:0/20:4)[M+NH4]+	TG 54:4(16:0/18:0/20:4)	[M+NH4]+	10.1862	900.805	900.802	0.0035	N	Y
TG 54:4(16:0/18:1/20:3)[M+NH4]+	TG 54:4(16:0/18:1/20:3)	[M+NH4]+	10.0198	900.805	900.801	0.0035	N	Y
TG 54:5(16:0/16:0/22:5)[M+NH4]+	TG 54:5(16:0/16:0/22:5)	[M+NH4]+	9.90709	898.791	898.786	0.0048	N	Y
TG 54:5(16:0/18:0/20:5)[M+NH4]+	TG 54:5(16:0/18:0/20:5)	[M+NH4]+	9.88272	898.788	898.786	0.0021	17	N
TG 54:5(16:0/18:1/20:4)[M+Na]+	TG 54:5(16:0/18:1/20:4)	[M+Na]+	9.71498	903.744	903.741	0.00265	17	Y
TG 54:5(16:0/18:1/20:4)[M+NH4]+	TG 54:5(16:0/18:1/20:4)	[M+NH4]+	9.73539	898.789	898.786	0.00345	17	Y
TG 54:6(16:0/16:0/22:6)[M+NH4]+	TG 54:6(16:0/16:0/22:6)	[M+NH4]+	9.59127	896.773	896.77	0.0027	17	N
TG 54:6(16:0/16:1/22:5)[M+NH4]+	TG 54:6(16:0/16:1/22:5)	[M+NH4]+	9.42066	896.773	896.77	0.00235	17	Y
TG 54:6(16:0/18:1/20:5)[M+NH4]+	TG 54:6(16:0/18:1/20:5)	[M+NH4]+	9.38753	896.773	896.77	0.00235	17	Y
TG 54:6(16:0/18:2/20:4)[M+NH4]+	TG 54:6(16:0/18:2/20:4)	[M+NH4]+	9.22668	896.773	896.77	0.00235	17	Y
TG 54:6(16:0/18:3/20:3)[M+NH4]+	TG 54:6(16:0/18:3/20:3)	[M+NH4]+	9.15392	896.772	896.77	0.002	N	Y
TG 54:6(16:1/18:3/20:2)[M+NH4]+	TG 54:6(16:1/18:3/20:2)	[M+NH4]+	9.1701	896.773	896.77	0.00235	17	Y
TG 54:7(16:0/16:1/22:6)[M+NH4]+	TG 54:7(16:0/16:1/22:6)	[M+NH4]+	9.09856	894.752	894.755	-0.0028	17	Y
TG 54:7(16:0/18:3/20:4)[M+NH4]+	TG 54:7(16:0/18:3/20:4)	[M+NH4]+	8.86996	894.752	894.755	-0.0022	N	Y
TG 54:7(16:1/16:1/22:5)[M+NH4]+	TG 54:7(16:1/16:1/22:5)	[M+NH4]+	8.9922	894.751	894.755	-0.0034	17	N
TG 54:7(16:1/18:1/20:5)[M+NH4]+	TG 54:7(16:1/18:1/20:5)	[M+NH4]+	8.88937	894.752	894.755	-0.0022	N	Y
TG 54:7(16:1/18:2/20:4)[M+NH4]+	TG 54:7(16:1/18:2/20:4)	[M+NH4]+	8.90798	894.751	894.755	-0.0034	17	N
TG 54:8(16:0/18:3/20:5)[M+NH4]+	TG 54:8(16:0/18:3/20:5)	[M+NH4]+	8.56076	892.739	892.739	0.00035	17	Y
TG 54:8(16:1/16:1/22:6)[M+NH4]+	TG 54:8(16:1/16:1/22:6)	[M+NH4]+	8.73843	892.74	892.739	0.0015	N	Y
TG 54:8(16:1/18:2/20:5)[M+NH4]+	TG 54:8(16:1/18:2/20:5)	[M+NH4]+	8.47655	892.74	892.739	0.0015	N	Y
TG 54:8(16:1/18:3/20:4)[M+NH4]+	TG 54:8(16:1/18:3/20:4)	[M+NH4]+	8.39557	892.74	892.739	0.0015	N	Y
TG 54:9(16:1/18:3/20:5)[M+Na]+	TG 54:9(16:1/18:3/20:5)	[M+Na]+	8.07278	895.682	895.679	0.0028	N	Y
TG 55:3(17:0/18:1/20:2)[M+NH4]+	TG 55:3(17:0/18:1/20:2)	[M+NH4]+	10.5355	916.831	916.833	-0.0019	17	Y
TG 55:4(17:0/18:1/20:3)[M+NH4]+	TG 55:4(17:0/18:1/20:3)	[M+NH4]+	10.1822	914.817	914.817	0.0001	17	Y
TG 55:4(17:1/18:1/20:2)[M+NH4]+	TG 55:4(17:1/18:1/20:2)	[M+NH4]+	10.1196	914.817	914.817	0.0001	17	Y
TG 55:5(17:0/18:1/20:4)[M+NH4]+	TG 55:5(17:0/18:1/20:4)	[M+NH4]+	9.95952	912.804	912.802	0.0021	17	Y
TG 55:6(16:0/17:1/22:5)[M+NH4]+	TG 55:6(16:0/17:1/22:5)	[M+NH4]+	9.61603	910.785	910.786	-0.0008	N	Y
TG 55:6(17:0/18:1/20:5)[M+NH4]+	TG 55:6(17:0/18:1/20:5)	[M+NH4]+	9.63582	910.789	910.786	0.0033	17	N
TG 55:6(17:1/18:0/20:5)[M+NH4]+	TG 55:6(17:1/18:0/20:5)	[M+NH4]+	9.6221	910.785	910.786	-0.0008	N	Y
TG 55:6(17:1/18:1/20:4)[M+NH4]+	TG 55:6(17:1/18:1/20:4)	[M+NH4]+	9.53298	910.785	910.786	-0.0008	N	Y
TG 55:7(16:1/17:1/22:5)[M+NH4]+	TG 55:7(16:1/17:1/22:5)	[M+NH4]+	9.19083	908.773	908.77	0.0024	17	N
TG 56:0(16:0/18:0/22:0)[M+NH4]+	TG 56:0(16:0/18:0/22:0)	[M+NH4]+	11.8399	936.893	936.895	-0.0021	N	Y
TG 56:1(16:0/18:1/22:0)[M+NH4]+	TG 56:1(16:0/18:1/22:0)	[M+NH4]+	11.4422	934.881	934.88	0.0009	N	Y
TG 56:10(16:0/20:5/20:5)[M+Na]+	TG 56:10(16:0/20:5/20:5)	[M+Na]+	8.40193	921.698	921.694	0.0038	N	Y
TG 56:10(16:1/20:4/20:5)[M+NH4]+	TG 56:10(16:1/20:4/20:5)	[M+NH4]+	8.37882	916.737	916.739	-0.0015	17	N
TG 56:2(18:1/18:1/20:0)[M+NH4]+	TG 56:2(18:1/18:1/20:0)	[M+NH4]+	11.121	932.868	932.864	0.0035	17	N
TG 56:3(18:0/18:1/20:2)[M+NH4]+	TG 56:3(18:0/18:1/20:2)	[M+NH4]+	10.7412	930.848	930.848	0	17	Y
TG 56:4(18:0/18:1/20:3)[M+NH4]+	TG 56:4(18:0/18:1/20:3)	[M+NH4]+	10.4277	928.836	928.833	0.00285	17	Y
TG 56:4(18:1/18:1/20:2)[M+NH4]+	TG 56:4(18:1/18:1/20:2)	[M+NH4]+	10.3293	928.836	928.833	0.00285	17	Y
TG 56:5(16:0/18:0/22:5)[M+NH4]+	TG 56:5(16:0/18:0/22:5)	[M+NH4]+	10.3749	926.819	926.817	0.0023	N	Y
TG 56:5(16:0/18:1/22:4)[M+NH4]+	TG 56:5(16:0/18:1/22:4)	[M+NH4]+	10.083	926.819	926.817	0.00215	17	Y
TG 56:5(16:0/20:1/20:4)[M+NH4]+	TG 56:5(16:0/20:1/20:4)	[M+NH4]+	10.1945	926.819	926.817	0.002	17	N
TG 56:5(16:0/20:2/20:3)[M+NH4]+	TG 56:5(16:0/20:2/20:3)	[M+NH4]+	10.0136	926.819	926.817	0.00215	17	Y
TG 56:5(18:0/18:1/20:4)[M+NH4]+	TG 56:5(18:0/18:1/20:4)	[M+NH4]+	10.1944	926.819	926.817	0.0023	N	Y
TG 56:5(18:1/18:1/20:3)[M+NH4]+	TG 56:5(18:1/18:1/20:3)	[M+NH4]+	10.0051	926.819	926.817	0.002	17	N
TG 56:6(16:0/18:0/22:6)[M+NH4]+	TG 56:6(16:0/18:0/22:6)	[M+NH4]+	10.038	924.807	924.802	0.005	N	Y
TG 56:6(16:0/18:1/22:5)[M+NH4]+	TG 56:6(16:0/18:1/22:5)	[M+NH4]+	9.8525	924.805	924.801	0.0037	17	Y
TG 56:6(16:0/20:2/20:4)[M+NH4]+	TG 56:6(16:0/20:2/20:4)	[M+NH4]+	9.78458	924.805	924.802	0.0037	17	Y
TG 56:6(18:1/18:1/20:4)[M+NH4]+	TG 56:6(18:1/18:1/20:4)	[M+NH4]+	9.71406	924.804	924.802	0.0024	17	N
TG 56:7(16:0/18:1/22:6)[M+Na]+	TG 56:7(16:0/18:1/22:6)	[M+Na]+	9.57847	927.741	927.741	0.0001	N	Y
TG 56:7(16:0/18:1/22:6)[M+NH4]+	TG 56:7(16:0/18:1/22:6)	[M+NH4]+	9.5806	922.788	922.786	0.00165	17	Y
TG 56:7(16:0/18:2/22:5)[M+NH4]+	TG 56:7(16:0/18:2/22:5)	[M+NH4]+	9.47205	922.788	922.786	0.002	N	Y
TG 56:7(16:0/20:2/20:5)[M+NH4]+	TG 56:7(16:0/20:2/20:5)	[M+NH4]+	9.39061	922.788	922.786	0.00165	17	Y
TG 56:7(16:0/20:3/20:4)[M+NH4]+	TG 56:7(16:0/20:3/20:4)	[M+NH4]+	9.27663	922.788	922.786	0.002	N	Y
TG 56:7(16:1/20:2/20:4)[M+NH4]+	TG 56:7(16:1/20:2/20:4)	[M+NH4]+	9.27518	922.787	922.786	0.0013	17	N
TG 56:7(18:1/18:2/20:4)[M+NH4]+	TG 56:7(18:1/18:2/20:4)	[M+NH4]+	9.23845	922.788	922.786	0.002	N	Y
TG 56:8(16:0/18:2/22:6)[M+NH4]+	TG 56:8(16:0/18:2/22:6)	[M+NH4]+	9.0832	920.771	920.77	0.0004	17	N
TG 56:8(16:0/18:3/22:5)[M+NH4]+	TG 56:8(16:0/18:3/22:5)	[M+NH4]+	9.09572	920.773	920.77	0.0025	N	Y
TG 56:8(16:0/20:3/20:5)[M+NH4]+	TG 56:8(16:0/20:3/20:5)	[M+NH4]+	9.023	920.773	920.77	0.0025	N	Y
TG 56:8(16:0/20:4/20:4)[M+NH4]+	TG 56:8(16:0/20:4/20:4)	[M+NH4]+	9.17553	920.772	920.77	0.00145	17	Y
TG 56:8(16:1/20:2/20:5)[M+NH4]+	TG 56:8(16:1/20:2/20:5)	[M+NH4]+	9.00313	920.771	920.77	0.0004	17	N
TG 56:8(18:1/18:2/20:5)[M+NH4]+	TG 56:8(18:1/18:2/20:5)	[M+NH4]+	8.93937	920.773	920.77	0.0025	N	Y
TG 56:9(16:0/18:3/22:6)[M+NH4]+	TG 56:9(16:0/18:3/22:6)	[M+NH4]+	8.72197	918.756	918.755	0.0014	N	Y
TG 56:9(16:0/20:4/20:5)[M+NH4]+	TG 56:9(16:0/20:4/20:5)	[M+NH4]+	8.78144	918.756	918.755	0.0014	N	Y
TG 56:9(18:1/18:3/20:5)[M+NH4]+	TG 56:9(18:1/18:3/20:5)	[M+NH4]+	8.56292	918.756	918.755	0.0014	N	Y
TG 57:6(17:0/18:1/22:5)[M+NH4]+	TG 57:6(17:0/18:1/22:5)	[M+NH4]+	10.158	938.818	938.817	0.0005	N	Y
TG 57:7(17:0/18:1/22:6)[M+NH4]+	TG 57:7(17:0/18:1/22:6)	[M+NH4]+	9.79413	936.804	936.802	0.00245	17	Y
TG 57:7(17:1/18:1/22:5)[M+NH4]+	TG 57:7(17:1/18:1/22:5)	[M+NH4]+	9.69618	936.804	936.802	0.0028	N	Y
TG 57:8(17:0/18:2/22:6)[M+NH4]+	TG 57:8(17:0/18:2/22:6)	[M+NH4]+	9.36845	934.79	934.786	0.0037	N	Y
TG 57:8(17:1/20:2/20:5)[M+NH4]+	TG 57:8(17:1/20:2/20:5)	[M+NH4]+	9.20665	934.79	934.786	0.0037	N	Y
TG 57:8(17:1/20:3/20:4)[M+NH4]+	TG 57:8(17:1/20:3/20:4)	[M+NH4]+	9.28482	934.79	934.786	0.0037	N	Y
TG 57:9(17:0/20:4/20:5)[M+NH4]+	TG 57:9(17:0/20:4/20:5)	[M+NH4]+	9.08395	932.768	932.77	-0.0027	N	Y
TG 58:10(16:0/20:4/22:6)[M+Na]+	TG 58:10(16:0/20:4/22:6)	[M+Na]+	8.98757	949.726	949.726	0.0004	N	Y
TG 58:10(16:0/20:4/22:6)[M+NH4]+	TG 58:10(16:0/20:4/22:6)	[M+NH4]+	8.89482	944.768	944.77	-0.0018	N	Y
TG 58:10(16:0/20:5/22:5)[M+NH4]+	TG 58:10(16:0/20:5/22:5)	[M+NH4]+	8.83539	944.768	944.77	-0.0018	N	Y
TG 58:10(16:1/20:4/22:5)[M+NH4]+	TG 58:10(16:1/20:4/22:5)	[M+NH4]+	9.05352	944.767	944.77	-0.0032	17	Y
TG 58:11(16:0/20:5/22:6)[M+NH4]+	TG 58:11(16:0/20:5/22:6)	[M+NH4]+	8.58507	942.753	942.755	-0.0019	17	N
TG 58:6(16:0/20:2/22:4)[M+NH4]+	TG 58:6(16:0/20:2/22:4)	[M+NH4]+	10.1103	952.836	952.833	0.003	N	Y
TG 58:6(18:0/18:1/22:5)[M+NH4]+	TG 58:6(18:0/18:1/22:5)	[M+NH4]+	10.3666	952.835	952.833	0.0027	17	Y
TG 58:6(18:1/18:1/22:4)[M+NH4]+	TG 58:6(18:1/18:1/22:4)	[M+NH4]+	10.1046	952.835	952.833	0.0027	17	Y
TG 58:8(16:0/20:2/22:6)[M+NH4]+	TG 58:8(16:0/20:2/22:6)	[M+NH4]+	9.65891	948.801	948.802	-0.0005	N	Y
TG 58:8(16:1/20:2/22:5)[M+NH4]+	TG 58:8(16:1/20:2/22:5)	[M+NH4]+	9.51933	948.801	948.802	-0.0005	N	Y
TG 58:8(18:1/18:1/22:6)[M+NH4]+	TG 58:8(18:1/18:1/22:6)	[M+NH4]+	9.60572	948.801	948.802	-0.0005	N	Y
TG 58:8(18:1/18:2/22:5)[M+NH4]+	TG 58:8(18:1/18:2/22:5)	[M+NH4]+	9.52023	948.801	948.802	-0.0005	N	Y
TG 58:8(18:1/20:2/20:5)[M+NH4]+	TG 58:8(18:1/20:2/20:5)	[M+NH4]+	9.43342	948.801	948.802	-0.0005	N	Y
TG 58:9(16:0/20:3/22:6)[M+NH4]+	TG 58:9(16:0/20:3/22:6)	[M+NH4]+	9.21116	946.789	946.786	0.0028	N	Y
TG 58:9(16:0/20:4/22:5)[M+NH4]+	TG 58:9(16:0/20:4/22:5)	[M+NH4]+	9.2855	946.788	946.786	0.0021	17	Y
TG 58:9(16:0/20:5/22:4)[M+NH4]+	TG 58:9(16:0/20:5/22:4)	[M+NH4]+	9.26695	946.787	946.786	0.0014	17	N
TG 58:9(16:1/20:2/22:6)[M+NH4]+	TG 58:9(16:1/20:2/22:6)	[M+NH4]+	9.10663	946.789	946.786	0.0028	N	Y
TG 58:9(18:0/20:4/20:5)[M+NH4]+	TG 58:9(18:0/20:4/20:5)	[M+NH4]+	9.35207	946.789	946.786	0.0028	N	Y
TG 58:9(18:1/18:3/22:5)[M+NH4]+	TG 58:9(18:1/18:3/22:5)	[M+NH4]+	9.10323	946.787	946.786	0.0014	17	N
TG 60:10(16:0/22:5/22:5)[M+NH4]+	TG 60:10(16:0/22:5/22:5)	[M+NH4]+	9.4268	972.806	972.802	0.00435	17	Y
TG 60:10(18:1/20:4/22:5)[M+NH4]+	TG 60:10(18:1/20:4/22:5)	[M+NH4]+	9.26081	972.806	972.802	0.00435	17	Y
TG 60:11(16:0/22:5/22:6)[M+NH4]+	TG 60:11(16:0/22:5/22:6)	[M+NH4]+	9.11028	970.788	970.786	0.0026	N	Y
TG 60:11(18:1/20:5/22:5)[M+NH4]+	TG 60:11(18:1/20:5/22:5)	[M+NH4]+	9.02619	970.788	970.786	0.0026	N	Y
TG 60:11(20:2/20:4/20:5)[M+NH4]+	TG 60:11(20:2/20:4/20:5)	[M+NH4]+	8.85843	970.788	970.786	0.0026	N	Y
TG 60:12(16:0/22:6/22:6)[M+NH4]+	TG 60:12(16:0/22:6/22:6)	[M+NH4]+	8.74987	968.767	968.77	-0.0029	17	N
TG 60:14(20:4/20:5/20:5)[M+NH4]+	TG 60:14(20:4/20:5/20:5)	[M+NH4]+	7.72637	964.742	964.739	0.0033	N	Y
TG 60:7(18:0/20:2/22:5)[M+NH4]+	TG 60:7(18:0/20:2/22:5)	[M+NH4]+	10.4195	978.851	978.848	0.0024	N	Y
TG 60:7(18:1/20:2/22:4)[M+NH4]+	TG 60:7(18:1/20:2/22:4)	[M+NH4]+	10.1603	978.851	978.848	0.0024	N	Y
TG 60:8(18:1/20:2/22:5)[M+NH4]+	TG 60:8(18:1/20:2/22:5)	[M+NH4]+	9.90823	976.836	976.833	0.0028	17	Y
TG 60:9(16:0/22:4/22:5)[M+NH4]+	TG 60:9(16:0/22:4/22:5)	[M+NH4]+	9.74755	974.821	974.817	0.0036	N	Y
TG 60:9(18:1/20:2/22:6)[M+NH4]+	TG 60:9(18:1/20:2/22:6)	[M+NH4]+	9.64799	974.821	974.817	0.0036	N	Y
TG 62:10(20:2/20:3/22:5)[M+NH4]+	TG 62:10(20:2/20:3/22:5)	[M+NH4]+	9.64526	1000.84	1000.83	0.0022	N	Y
TG 62:11(20:2/20:4/22:5)[M+NH4]+	TG 62:11(20:2/20:4/22:5)	[M+NH4]+	9.27287	998.817	998.817	-0.0004	17	N
TG 62:12(20:4/20:5/22:3)[M+NH4]+	TG 62:12(20:4/20:5/22:3)	[M+NH4]+	9.00587	996.798	996.802	-0.0036	17	N
TG 62:16(20:5/20:5/22:6)[M+Na]+	TG 62:16(20:5/20:5/22:6)	[M+Na]+	7.56548	993.699	993.694	0.0049	N	Y
TG 64:12(20:2/22:5/22:5)[M+NH4]+	TG 64:12(20:2/22:5/22:5)	[M+NH4]+	9.51496	1024.83	1024.83	-0.002	N	Y
TG 64:13(20:2/22:5/22:6)[M+NH4]+	TG 64:13(20:2/22:5/22:6)	[M+NH4]+	9.25693	1022.82	1022.82	-0.0015	17	N
TG 64:14(20:2/22:6/22:6)[M+NH4]+	TG 64:14(20:2/22:6/22:6)	[M+NH4]+	8.85662	1020.81	1020.8	0.0042	N	Y
TG 64:14(20:3/22:5/22:6)[M+NH4]+	TG 64:14(20:3/22:5/22:6)	[M+NH4]+	8.8557	1020.81	1020.8	0.0042	N	Y
TG 64:17(20:5/22:6/22:6)[M+NH4]+	TG 64:17(20:5/22:6/22:6)	[M+NH4]+	7.77274	1014.76	1014.75	0.0041	N	Y
